# Supplementary material for: The electrochemically enabled α-C(sp3)–H azolation of ketones
Source: Royal Society of Chemistry journal article supplement (doi:10.1039/d3cc02852f), 2023-01-01

## Supporting Information

### The Electrochemically Enabled $\alpha$ -C(sp<sup>3</sup>)-H Azolation of Ketones

Songlin Fang,<sup>b,†</sup> Kaihui Zhong,<sup>a,†</sup> Shaogao Zeng,<sup>b</sup> Xinwei Hu,<sup>a,\*</sup> Pinghua Sun,<sup>b,\*</sup>  
Zhixiong Ruan<sup>a,\*</sup>

<sup>a</sup>Key Laboratory of Molecular Target & Clinical Pharmacology and the State Key Laboratory of Respiratory Disease, School of Pharmaceutical Sciences & the Fifth Affiliated Hospital, Guangzhou Medical University, Guangzhou, 511436, P.R.China

Email: [zruan@gzhmu.edu.cn](mailto:zruan@gzhmu.edu.cn); [xinweihu@gzhmu.edu.cn](mailto:xinweihu@gzhmu.edu.cn)

<sup>b</sup>International Cooperative Laboratory of Traditional Chinese Medicine Modernization and Innovative Drug Development of Chinese Ministry of Education, College of Pharmacy, Jinan University, Guangzhou 510632, P.R. China

Email: [pinghuasunny@163.com](mailto:pinghuasunny@163.com)

<sup>†</sup>S.F. and K. Z. contributed equally to this work

## Table of Contents

|                                                                                    |    |
|------------------------------------------------------------------------------------|----|
| General Remarks                                                                    | 3  |
| Optimization Studies                                                               | 5  |
| General Procedures for Electrochemical Reactions                                   | 6  |
| Characterization Data of Products <b>3a-3z</b> , <b>3aa-3va</b> and <b>3ab-3aj</b> | 7  |
| Gram-scale Synthesis and Control Experiments for the Mechanism Studies             | 35 |
| Crystallographic description of <b>3a</b> and <b>3n</b>                            | 37 |
| References                                                                         | 49 |
| NMR Spectra                                                                        | 50 |

## General Remarks

Electrochemical reactions were conducted using an MYWAVE MPD-3003S potentiostat in a constant current mode using undivided cell equipped with graphite plate (1.0 cm × 1.0 cm × 0.2 cm) as the anode and platinum plate (1.0 cm × 1.0 cm × 0.01 cm) as the cathode under air. Acetonitrile(MeCN), tetrabutylammonium iodide(TBAI), graphite plates, platinum(Pt) electrodes, chemicals were obtained from commercial sources and were used without further purification. Graphite plates are from Bei Jing Jinglong Special Carbon Technology Co., Ltd, platinum electrodes are from Tian Jin Aida (China). Yields refer to isolated compounds, estimated to be >95% pure as determined by <sup>1</sup>H-NMR. TLC: Macherey-Nagel, TLC plates Alugram®Sil G/UV254. Detection under UV light at 254 nm. Chromatography separations were carried out on silica gel 60H (300-400 mesh) manufactured by Qingdao Haiyang Chemical Group Co. (China). High resolution mass spectrometry (HRMS) was measured on Agilent 6210 LC/MSD TOF mass spectrometer. NMR spectra were recorded on Bruker, AVANCE III HD 400 MHz (<sup>1</sup>H 400 MHz; <sup>13</sup>C 100 MHz) in CDCl<sub>3</sub>. If not otherwise specified, chemical shifts (δ) are given in ppm. Melting point were recorded on JHX-5Plus.

(a)

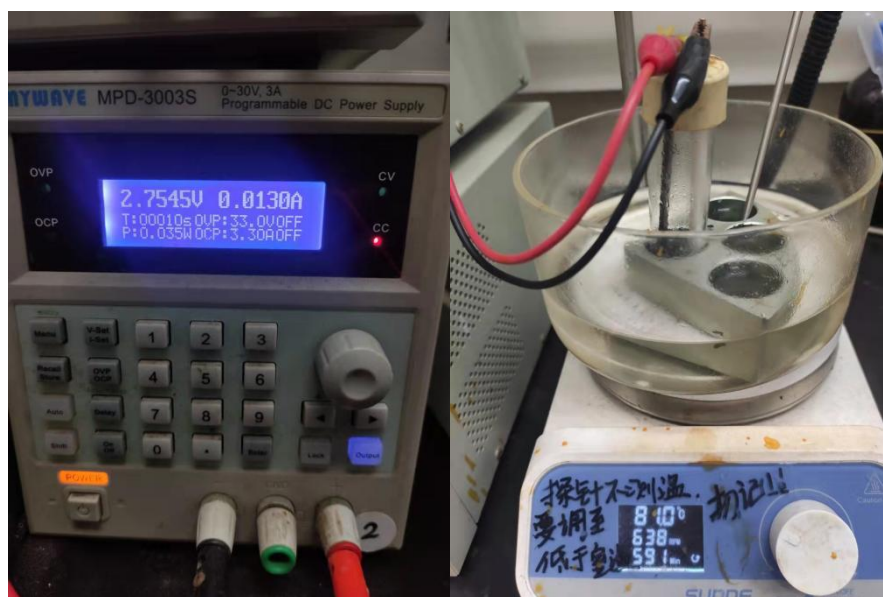

(b)

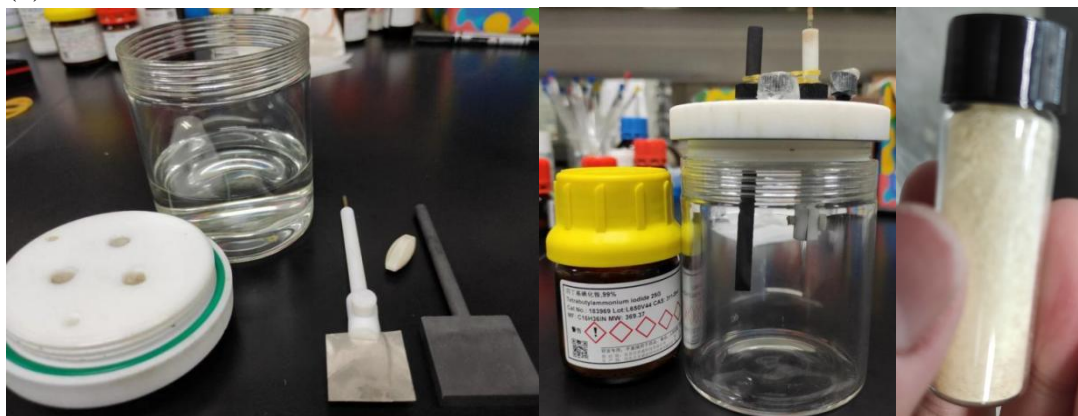

**Figure S1.** The set up of electrochemical reaction. (a) Equipment of standard reaction;  
(b) Equipment of gram-scale reaction.

## Optimization Studies

**Table S1. Optimization of Electrochemical Reaction Conditions<sup>a</sup>**

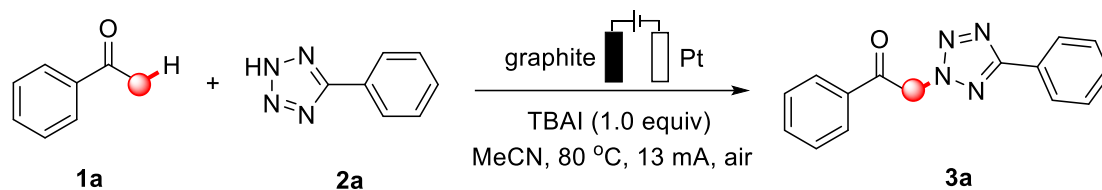

| entry    | deviation from standard conditions                          | yield (%) <sup>b</sup> |
|----------|-------------------------------------------------------------|------------------------|
| <b>1</b> | <b>None</b>                                                 | <b>85</b>              |
| 2        | No TBAI                                                     | 0                      |
| 3        | NH <sub>4</sub> I instead of TBAI                           | trace                  |
| 4        | <i>n</i> -Bu <sub>4</sub> NHSO <sub>4</sub> instead of TBAI | 0                      |
| 5        | <i>n</i> -Bu <sub>4</sub> NBF <sub>4</sub> instead of TBAI  | 0                      |
| 6        | <i>n</i> -Bu <sub>4</sub> NPF <sub>6</sub> instead of TBAI  | 0                      |
| 7        | 0.5 equiv TBAI instead of 1.0 equiv TBAI                    | 66                     |
| 8        | 0.1 equiv TBAI instead of 1.0 equiv TBAI                    | 24                     |
| 9        | r.t. instead of 80 °C                                       | trace                  |
| 10       | DCE as solvent                                              | 0                      |
| 11       | MeOH as solvent                                             | 0                      |
| 12       | 12 h                                                        | 72                     |
| 13       | 16 mA                                                       | 81                     |
| 14       | No current                                                  | 0                      |

<sup>a</sup> Reaction conditions: Undivided cell, graphite anode (1 cm × 1 cm × 0.2 cm), Pt cathode (1 cm × 1 cm × 0.01 cm), **1a** (1.5 mmol), **2a** (0.50 mmol), TBAI (0.50 mmol), MeCN (8.0 mL), constant current = 13.0 mA, 16 h (15.5 *F*), 80 °C, under air. <sup>b</sup> Yields of isolated product.

## General Procedure for Electrochemical Reactions

**General Procedure:** In an undivided cell (15 mL) equipped with a stirring bar, a mixture of substrates **1a** (1.5 mmol), **2a** (0.50 mmol), *n*-Bu<sub>4</sub>NI (0.50 mmol) and MeCN (8.0 ml) were added. The cell was equipped with graphite plate (1 cm × 1 cm × 0.2 cm) as the anode and platinum plate (1 cm × 1 cm × 0.01 cm) as the cathode connected to an MYWAVE MPD-3003S DC regulated power supply. The reaction mixture was stirred and electrolyzed at a constant current of 13 mA at 80 °C by heating mantle for 16 h. Upon completion, the solvent was removed directly under reduced pressure to afford the crude product, which was further purified by flash column chromatography to afford the desired products **3a-3z**, **3aa-3va** and **3ab-3aj**.

Unsuccessful examples

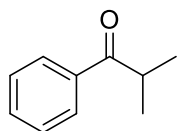

2-methyl-1-phenylpropan-1-one

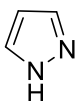

1*H*-pyrazole

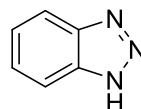

1*H*-benzo[*d*][1,2,3]triazole

### Characterization Data of Products 3a-3z, 3aa-3va and 3ab-3aj.

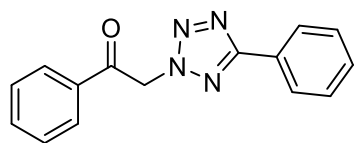

**1-Phenyl-2-(5-phenyl-2H-tetrazol-2-yl)ethan-1-one (3a):** The general procedure was followed using substrate acetophenone **1a** (1.50 mmol, 180 mg) and 5-phenyltetrazole **2a** (0.50 mmol, 73 mg). Isolation by column chromatography (PE/EtOAc: 20/1→10/1) yielded **3a** (112 mg, 85%) as a white solid.  $R_f = 0.33$  (10:1 petroleum ether: ethyl acetate).  $^1\text{H NMR}$  (400 MHz,  $\text{CDCl}_3$ )  $\delta = 8.17$  (d,  $J = 4.8$  Hz, 2H), 8.01 (d,  $J = 7.5$  Hz, 2H), 7.68 (dd,  $J = 7.3, 7.3$  Hz, 1H), 7.55 (dd,  $J = 7.4, 7.4$  Hz, 2H), 7.49 (d,  $J = 4.9$  Hz, 3H), 6.14 (s, 2H).  $^{13}\text{C NMR}$  (100 MHz,  $\text{CDCl}_3$ )  $\delta = 188.9, 165.7, 134.7, 133.8, 130.4, 129.2, 128.9, 128.2, 127.2, 127.0, 58.2$ . HR-MS (ESI)  $m/z$  calcd for  $\text{C}_{15}\text{H}_{13}\text{N}_4\text{O}$   $[\text{M}+\text{H}]^+$  265.1084, found 265.1082. Analytical data for compound **3a** is consistent with literature report.<sup>[1]</sup>

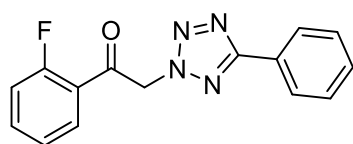

**1-(2-Fluorophenyl)-2-(5-phenyl-2H-tetrazol-2-yl)ethan-1-one (3b):** The general procedure was followed using substrate 1-(2-fluorophenyl)ethan-1-one **1a** (1.5 mmol, 207 mg) and 5-phenyltetrazole **2a** (0.50 mmol, 73 mg). Isolation by column chromatography (PE/EtOAc: 15/1→8/1) yielded **3b** (96 mg, 68%) as a white solid. m.p: 115.0-116.8°C.  $R_f = 0.30$  (8:1 petroleum ether: ethyl acetate).  $^1\text{H NMR}$  (400 MHz,  $\text{CDCl}_3$ )  $\delta$  8.18 (d,  $J = 3.5$  Hz, 2H), 8.03 (dd,  $J = 7.4, 7.4$  Hz, 1H), 7.72 – 7.62 (m, 1H), 7.49 (s, 3H), 7.38 – 7.27 (m, 2H), 6.09 (s, 2H).  $^{13}\text{C NMR}$  (100 MHz,  $\text{CDCl}_3$ )  $\delta$  187.2, 165.6, 162.6 (d,  $^1J_{\text{C-F}} = 254.3$  Hz), 136.6 (d,  $^3J_{\text{C-F}} = 9.3$  Hz), 131.2, 131.2, 130.4, 128.9, 127.3, 125.3, 125.3, 122.0 (d,  $^3J_{\text{C-F}} = 13.4$  Hz), 116.8 (d,  $^2J_{\text{C-F}} = 23.5$  Hz), 61.6. HR-MS (ESI)  $m/z$  calcd for  $\text{C}_{15}\text{H}_{12}\text{FN}_4\text{O}$   $[\text{M}+\text{H}]^+$  283.0990, found 283.0981. IR (KBr): 3062, 3008, 2963, 1837, 1699, 1606, 1450, 1342, 1277, 1515, 1041, 849, 782, 698, 626  $\text{cm}^{-1}$ .

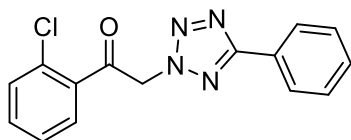

**1-(2-Chlorophenyl)-2-(5-phenyl-2H-tetrazol-2-yl)ethan-1-one (3c):** The general procedure was followed using substrate 1-(2-chlorophenyl)ethan-1-one **1a** (1.5 mmol, 231 mg) and 5-phenyltetrazole **2a** (0.50 mmol, 73 mg). Isolation by column chromatography (PE/EtOAc: 15/1→8/1) yielded **3c** (121 mg, 81%) as a white solid. m.p: 133.9-135.2°C.  $R_f = 0.30$  (8:1 petroleum ether: ethyl acetate).  $^1\text{H}$  NMR (400 MHz,  $\text{CDCl}_3$ )  $\delta$  8.17 (d,  $J = 5.5$  Hz, 2H), 7.76 (d,  $J = 7.5$  Hz, 1H), 7.50 (d,  $J = 12.0$  Hz, 5H), 7.42 (s, 1H), 6.15 (s, 2H).  $^{13}\text{C}$  NMR (100 MHz,  $\text{CDCl}_3$ )  $\delta$  191.1, 165.6, 134.9, 133.8, 132.1, 131.1, 130.7, 130.5, 128.9, 127.5, 127.2, 127.0, 60.9. HR-MS (ESI)  $m/z$  calcd for  $\text{C}_{15}\text{H}_{12}\text{ClN}_4\text{O}$   $[\text{M}+\text{H}]^+$  299.0694, found 299.0688. IR (KBr): 3081, 2956, 1719, 1588, 1448, 1329, 1211, 1039, 838, 759, 658  $\text{cm}^{-1}$ .

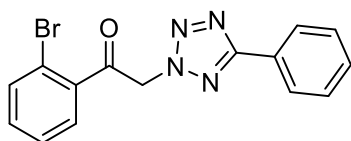

**1-(2-Bromophenyl)-2-(5-phenyl-2H-tetrazol-2-yl)ethan-1-one (3d):** The general procedure was followed using substrate 1-(2-bromophenyl)ethan-1-one **1a** (1.5 mmol, 298 mg) and 5-phenyltetrazole **2a** (0.50 mmol, 73 mg). Isolation by column chromatography (PE/EtOAc: 13/1→6/1) yielded **3d** (141 mg, 82%) as a white solid. m.p: 130.7-132.8°C.  $R_f = 0.30$  (6:1 petroleum ether: ethyl acetate).  $^1\text{H}$  NMR (400 MHz,  $\text{CDCl}_3$ )  $\delta$  8.16 (dd,  $J = 6.4, 2.8$  Hz, 2H), 7.70 (d,  $J = 7.9$  Hz, 1H), 7.62 (dd,  $J = 7.5, 1.8$  Hz, 1H), 7.49 (dd,  $J = 5.1, 1.7$  Hz, 3H), 7.46 – 7.38 (m, 2H), 6.11 (s, 2H).  $^{13}\text{C}$  NMR (100 MHz,  $\text{CDCl}_3$ )  $\delta$  192.2, 165.6, 137.3, 134.3, 133.4, 130.5, 129.9, 128.9, 127.9, 127.2, 127.0, 119.6, 60.2. HR-MS (ESI)  $m/z$  calcd for  $\text{C}_{15}\text{H}_{12}\text{BrN}_4\text{O}$   $[\text{M}+\text{H}]^+$  343.0189, found 343.0181. IR (KBr): 3082, 2954, 1714, 1583, 1469, 1331, 1206, 1041, 983, 836, 737, 696  $\text{cm}^{-1}$ .



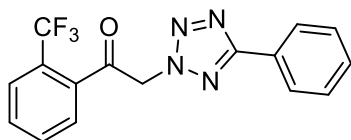

**2-(5-Phenyl-2H-tetrazol-2-yl)-1-[2-(trifluoromethyl)phenyl]ethan-1-one (3e):** The general procedure was followed using substrate 1-(2-(trifluoromethyl)phenyl)ethan-1-one **1a** (1.5 mmol, 282 mg) and 5-phenyltetrazole **2a** (0.50 mmol, 73 mg). Isolation by column chromatography (PE/EtOAc: 12/1→4/1) yielded **3e** (114 mg, 68%) as a white solid. m.p: 87.5-89.3°C.  $R_f = 0.30$  (4:1 petroleum ether: ethyl acetate).  $^1\text{H NMR}$  (400 MHz,  $\text{CDCl}_3$ )  $\delta$  8.18 – 8.13 (m, 2H), 7.80 (d,  $J = 6.8$  Hz, 1H), 7.68 (s, 2H), 7.62 (s, 1H), 7.49 (d,  $J = 5.1$  Hz, 3H), 5.91 (s, 2H).  $^{13}\text{C NMR}$  (100 MHz,  $\text{CDCl}_3$ )  $\delta$  193.0, 165.8, 135.5 (q,  $^4J_{\text{C-F}} = 3.6$  Hz), 132.2, 131.7, 130.5, 128.9, 127.9 (dd,  $^2J_{\text{C-F}} = 32.8, 4.2$  Hz), 127.5, 127.2 (q,  $^4J_{\text{C-F}} = 4.9$  Hz), 127.0, 127.0, 123.3 (d,  $^1J_{\text{C-F}} = 273.9$  Hz), 60.4. HR-MS (ESI)  $m/z$  calcd for  $\text{C}_{16}\text{H}_{12}\text{F}_3\text{N}_4\text{O}$   $[\text{M}+\text{H}]^+$  333.0958, found 333.0954. IR (KBr): 3082, 2990, 2882, 1711, 1592, 1520, 1496, 1483, 1308, 1243, 1178, 1113, 1089, 987, 813, 757  $\text{cm}^{-1}$ .

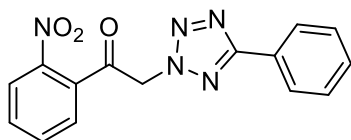

**1-(2-Nitrophenyl)-2-(5-phenyl-2H-tetrazol-2-yl)ethan-1-one (3f):** The general procedure was followed using substrate 1-(2-nitrophenyl)ethan-1-one **1a** (1.5 mmol, 247 mg) and 5-phenyltetrazole **2a** (0.50 mmol, 73 mg). Isolation by column chromatography (PE/EtOAc: 12/1→4/1) yielded **3f** (97 mg, 63%) as a pink solid. m.p: 140.7-142.7°C.  $R_f = 0.30$  (4:1 petroleum ether: ethyl acetate).  $^1\text{H NMR}$  (400 MHz,  $\text{CDCl}_3$ )  $\delta$  8.17 (d,  $J = 8.2$  Hz, 1H), 8.10 – 8.05 (m, 2H), 7.73 (dd,  $J = 7.5, 7.5$  Hz, 1H), 7.62 (dd,  $J = 7.8, 7.8$  Hz, 1H), 7.50 – 7.42 (m, 4H), 5.89 (s, 2H).  $^{13}\text{C NMR}$  (100 MHz,  $\text{CDCl}_3$ )  $\delta$  193.1, 165.7, 145.5, 134.8, 133.8, 131.7, 130.6, 128.9, 128.0, 126.9, 126.8, 124.4, 60.1. HR-MS (ESI)  $m/z$  calcd for  $\text{C}_{15}\text{H}_{12}\text{N}_5\text{O}_3$   $[\text{M}+\text{H}]^+$  310.0935, found 310.0929. IR (KBr): 2948, 1729, 1533, 1451, 1344, 1256, 1005, 996, 710, 692  $\text{cm}^{-1}$ .

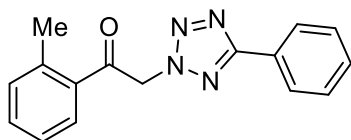

**2-(5-Phenyl-2H-tetrazol-2-yl)-1-(*o*-tolyl)ethan-1-one (3g):** The general procedure was followed using substrate 1-(*o*-tolyl)ethan-1-one **1a** (1.5 mmol, 201 mg) and 5-phenyltetrazole **2a** (0.50 mmol, 73 mg). Isolation by column chromatography (PE/EtOAc: 13/1 → 10/1) yielded **3g** (65 mg, 47%) as a white solid. m.p: 166.5-168.4°C.  $R_f = 0.30$  (8:1 petroleum ether: ethyl acetate).  $^1\text{H}$  NMR (400 MHz,  $\text{CDCl}_3$ )  $\delta$  8.21 – 8.13 (m, 2H), 7.79 (d,  $J = 7.6$  Hz, 1H), 7.55 – 7.44 (m, 4H), 7.40 – 7.31 (m, 2H), 6.06 (s, 2H), 2.57 (s, 3H).  $^{13}\text{C}$  NMR (100 MHz,  $\text{CDCl}_3$ )  $\delta$  191.3, 165.6, 140.5, 133.2, 132.8, 130.4, 128.9, 128.7, 127.3, 127.0, 127.0, 126.2, 59.5, 21.7. HR-MS (ESI)  $m/z$  calcd for  $\text{C}_{16}\text{H}_{15}\text{N}_4\text{O}$   $[\text{M}+\text{H}]^+$  279.1240, found 279.1242.

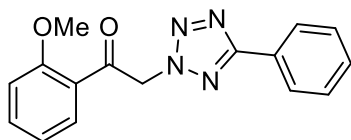

**1-(2-Methoxyphenyl)-2-(5-phenyl-2H-tetrazol-2-yl)ethan-1-one (3h):** The general procedure was followed using substrate 1-(2-methoxyphenyl)ethan-1-one **1a** (1.5 mmol, 225 mg) and 5-phenyltetrazole **2a** (0.50 mmol, 73 mg). Isolation by column chromatography (PE/EtOAc: 13/1 → 6/1) yielded **3h** (68 mg, 51%) as a white solid. m.p: 153.0-155.0°C.  $R_f = 0.30$  (6:1 petroleum ether: ethyl acetate).  $^1\text{H}$  NMR (400 MHz,  $\text{CDCl}_3$ )  $\delta$  8.17 (s, 2H), 7.98 (d,  $J = 9.4$  Hz, 1H), 7.60 (d,  $J = 8.4$  Hz, 1H), 7.48 (s, 3H), 7.14 – 7.01 (m, 2H), 6.11 (s, 2H), 4.05 (s, 3H).  $^{13}\text{C}$  NMR (100 MHz,  $\text{CDCl}_3$ )  $\delta$  189.7, 165.3, 159.7, 135.8, 131.5, 130.3, 128.8, 127.5, 127.0, 123.8, 121.4, 111.7, 62.5, 55.8. HR-MS (ESI)  $m/z$  calcd for  $\text{C}_{16}\text{H}_{15}\text{N}_4\text{O}_2$   $[\text{M}+\text{H}]^+$  295.1190, found 295.1183. IR (KBr): 3074, 2952, 1679, 1595, 1486, 1287, 1204, 1023, 772, 634  $\text{cm}^{-1}$ .

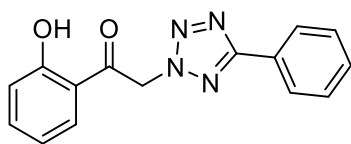

**1-(2-Hydroxyphenyl)-2-(5-phenyl-2H-tetrazol-2-yl)ethan-1-one (3i):** The general procedure was followed using substrate 1-(2-hydroxyphenyl)ethan-1-one **1a** (1.5 mmol, 208 mg) and 5-phenyltetrazole **2a** (0.50 mmol, 73 mg). Isolation by column chromatography (PE/EtOAc: 13/1→8/1) yielded **3i** (41 mg, 29%) as a white solid. m.p: 205.4-207.0°C. R<sub>f</sub> = 0.30 (6:1 petroleum ether: ethyl acetate). <sup>1</sup>H NMR (400 MHz, CDCl<sub>3</sub>) δ 11.34 (s, 1H), 8.26 – 8.13 (m, 2H), 7.79 – 7.71 (m, 1H), 7.64 – 7.45 (m, 4H), 7.05 (dd, *J* = 15.0, 8.0 Hz, 2H), 6.19 (s, 2H). <sup>13</sup>C NMR (100 MHz, CDCl<sub>3</sub>) δ 193.9, 165.8, 162.7, 137.9, 130.6, 128.9, 128.5, 127.1, 127.0, 119.8, 119.3, 117.1, 57.4. HR-MS (ESI) *m/z* calcd for C<sub>15</sub>H<sub>13</sub>N<sub>4</sub>O<sub>2</sub> [M+H]<sup>+</sup> 281.1033, found 281.1025. IR (KBr): 3139, 2992, 2952, 1665, 1450, 1346, 1280, 1204, 1043, 842, 790, 698 cm<sup>-1</sup>.

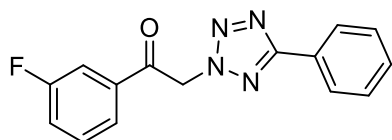

**1-(3-Fluorophenyl)-2-(5-phenyl-2H-tetrazol-2-yl)ethan-1-one (3j):** The general procedure was followed using substrate 1-(3-fluorophenyl)ethan-1-one **1a** (1.5 mmol, 207 mg) and 5-phenyltetrazole **2a** (0.50 mmol, 73 mg). Isolation by column chromatography (PE/EtOAc: 15/1→10/1) yielded **3j** (97 mg, 68%) as a white solid. m.p: 149.3-151.5°C. R<sub>f</sub> = 0.30 (6:1 petroleum ether: ethyl acetate). <sup>1</sup>H NMR (400 MHz, CDCl<sub>3</sub>) δ 8.17 (d, *J* = 4.8 Hz, 2H), 7.79 (d, *J* = 7.7 Hz, 1H), 7.70 (d, *J* = 8.9 Hz, 1H), 7.56 (dd, *J* = 6.8, 6.8 Hz, 1H), 7.49 (s, 3H), 7.40 (dd, *J* = 7.8, 7.8 Hz, 1H), 6.12 (s, 2H). <sup>13</sup>C NMR (100 MHz, CDCl<sub>3</sub>) δ 188.0, 165.7, 163.0 (d, <sup>1</sup>*J*<sub>C-F</sub> = 250.1 Hz), 135.7, 131.0 (d, <sup>4</sup>*J*<sub>C-F</sub> = 7.7 Hz), 130.5, 128.9, 127.1, 127.0, 123.9, 121.8 (d, <sup>3</sup>*J*<sub>C-F</sub> = 21.5 Hz), 115.0 (d, <sup>2</sup>*J*<sub>C-F</sub> = 22.7 Hz), 58.2. HR-MS (ESI) *m/z* calcd for C<sub>15</sub>H<sub>12</sub>FN<sub>4</sub>O [M+H]<sup>+</sup> 283.0990, found 283.0986. IR (KBr): 3072, 2983, 2939, 2853, 1696, 1593, 1452, 1351, 1252, 1048, 876, 791, 730 cm<sup>-1</sup>.

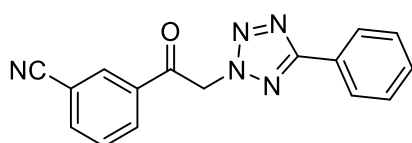

**3-[2-(5-Phenyl-2H-tetrazol-2-yl)acetyl]benzotrile (3k):** The general procedure was followed using substrate 3-acetylbenzotrile **1a** (1.5 mmol, 218 mg) and 5-phenyltetrazole **2a** (0.50 mmol, 73 mg). Isolation by column chromatography (PE/EtOAc: 11/1 → 6/1) yielded **3k** (138 mg, 95%) as a yellow solid. m.p: 168.5-170.6°C.  $R_f = 0.30$  (6:1 petroleum ether: ethyl acetate).  $^1\text{H}$  NMR (400 MHz,  $\text{CDCl}_3$ ) 8.30 (s, 1H), 8.22 (d,  $J = 8.0$  Hz, 1H), 8.18 – 8.13 (m, 2H), 7.96 (d,  $J = 7.8$  Hz, 1H), 7.71 (dd,  $J = 7.9, 7.9$  Hz, 1H), 7.53 – 7.46 (m, 3H), 6.14 (s, 2H).  $^{13}\text{C}$  NMR (100 MHz,  $\text{CDCl}_3$ )  $\delta$  187.4, 165.9, 137.4, 134.6, 132.0, 131.8, 130.6, 130.3, 129.0, 127.0, 126.9, 117.3, 114.0, 58.1. HR-MS (ESI)  $m/z$  calcd for  $\text{C}_{16}\text{H}_{12}\text{N}_5\text{O}$   $[\text{M}+\text{H}]^+$  290.1036, found 290.1033. IR (KBr): 3073, 2970, 2933, 1708, 1656, 1249, 1188, 1037, 822, 732  $\text{cm}^{-1}$ .

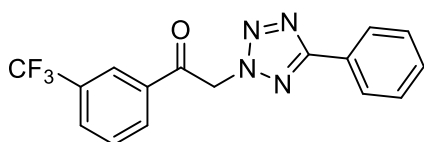

**2-(5-Phenyl-2H-tetrazol-2-yl)-1-(3-(trifluoromethyl)phenyl)ethan-1-one (3l):** The general procedure was followed using substrate 1-(3-(trifluoromethyl)phenyl)ethan-1-one **1a** (1.5 mmol, 282 mg) and 5-phenyltetrazole **2a** (0.50 mmol, 73 mg). Isolation by column chromatography (PE/EtOAc: 15/1→8/1) yielded **3l** (128 mg, 77%) as a white solid. m.p: 134.5-136.3°C.  $R_f = 0.30$  (6:1 petroleum ether: ethyl acetate).  $^1\text{H}$  NMR (400 MHz,  $\text{CDCl}_3$ )  $\delta$  8.26 (s, 1H), 8.22 – 8.15 (m, 3H), 7.95 (d,  $J = 7.8$  Hz, 1H), 7.72 (dd,  $J = 7.8, 7.8$  Hz, 1H), 7.50 (dd,  $J = 5.1, 1.9$  Hz, 3H), 6.17 (s, 2H).  $^{13}\text{C}$  NMR (100 MHz,  $\text{CDCl}_3$ )  $\delta$  188.0, 165.8, 134.3, 131.9 (d,  $^2J_{\text{C-F}} = 33.4$  Hz), 131.3, 131.1 (q,  $^4J_{\text{C-F}} = 3.5$  Hz), 130.6, 130.0, 128.9, 127.1, 127.0, 125.1 (q,  $^4J_{\text{C-F}} = 3.4$  Hz), 123.3 (d,  $^1J_{\text{C-F}} = 272.8$  Hz), 58.1. HR-MS (ESI)  $m/z$  calcd for  $\text{C}_{16}\text{H}_{12}\text{F}_3\text{N}_4\text{O}$   $[\text{M}+\text{H}]^+$  333.0958, found 333.0955. IR (KBr): 3081, 2979, 2941, 1710, 1615, 1455, 1329, 1218, 1073, 908, 804, 732, 662  $\text{cm}^{-1}$ .

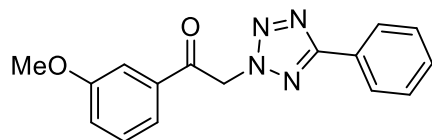

**1-(3-Methoxyphenyl)-2-(5-phenyl-2H-tetrazol-2-yl)ethan-1-one (3m):** The general procedure was followed using substrate 1-(3-methoxyphenyl)ethan-1-one **1a** (1.5 mmol, 225 mg) and 5-phenyltetrazole **2a** (0.50 mmol, 73 mg). Isolation by column chromatography (PE/EtOAc: 15/1→6/1) yielded **3m** (120 mg, 81%) as a white solid. m.p: 109.8-111.6°C.  $R_f = 0.32$  (6:1 petroleum ether: ethyl acetate).  $^1\text{H}$  NMR (400 MHz,  $\text{CDCl}_3$ )  $\delta$  8.22 – 8.14 (m, 2H), 7.57 (d,  $J = 7.6$  Hz, 1H), 7.53 – 7.42 (m, 5H), 7.22 (d,  $J = 8.2$  Hz, 1H), 6.12 (s, 2H), 3.87 (s, 3H).  $^{13}\text{C}$  NMR (100 MHz,  $\text{CDCl}_3$ )  $\delta$  188.9, 165.6, 160.2, 135.1, 130.4, 130.2, 128.9, 127.3, 127.0, 121.2, 120.5, 112.5, 58.3, 55.6. HR-MS (ESI)  $m/z$  calcd for  $\text{C}_{16}\text{H}_{15}\text{N}_4\text{O}_2$   $[\text{M}+\text{H}]^+$  295.1190, found 295.1185. IR (KBr): 3079, 2988, 2947, 1702, 1597, 1450, 1344, 1263, 1204, 1039, 793, 733  $\text{cm}^{-1}$ .

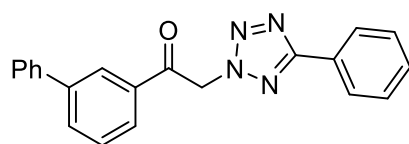

**1-([1,1'-Biphenyl]-3-yl)-2-(5-phenyl-2H-tetrazol-2-yl)ethan-1-one (3n):** The general procedure was followed using substrate 1-([1,1'-biphenyl]-3-yl)ethan-1-one **1a** (1.5 mmol, 294 mg) and 5-phenyltetrazole **2a** (0.50 mmol, 73 mg). Isolation by column chromatography (PE/EtOAc: 30/1→10/1) yielded **3n** (129 mg, 76%) as a white solid. m.p: 123.1-124.7°C.  $R_f = 0.32$  (6:1 petroleum ether: ethyl acetate).  $^1\text{H}$  NMR (400 MHz,  $\text{CDCl}_3$ )  $\delta$  8.23 – 8.16 (m, 3H), 7.97 (d,  $J = 7.8$  Hz, 1H), 7.89 (s, 1H), 7.63 (dd,  $J = 10.0, 7.8$  Hz, 3H), 7.52 – 7.46 (m, 5H), 7.42 (dd,  $J = 7.3, 7.3$  Hz, 1H), 6.19 (s, 2H).  $^{13}\text{C}$  NMR (100 MHz,  $\text{CDCl}_3$ )  $\delta$  189.0, 165.7, 142.5, 139.6, 134.4, 133.3, 130.5, 129.7, 129.1, 128.9, 128.2, 127.2, 127.0, 126.9, 58.3. HR-MS (ESI)  $m/z$  calcd for  $\text{C}_{21}\text{H}_{17}\text{N}_4\text{O}$   $[\text{M}+\text{H}]^+$  341.1397, found 341.1392. IR (KBr): 3084, 2961, 2912, 1808, 1452, 1347, 1214, 1128, 1113, 1004, 827, 793, 695  $\text{cm}^{-1}$ .

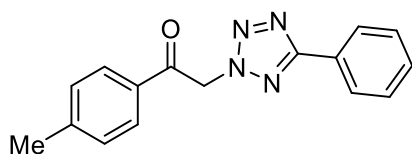

**2-(5-Phenyl-2H-tetrazol-2-yl)-1-(p-tolyl)ethan-1-one (3o):** The general procedure was followed using substrate 1-(p-tolyl)ethan-1-one **1a** (1.5 mmol, 201 mg) and 5-phenyltetrazole **2a** (0.50 mmol, 73 mg). Isolation by column chromatography (PE/EtOAc: 15/1 → 10/1) yielded **3o** (118 mg, 85%) as a white solid. m.p: 119.6-121.4°C.  $R_f = 0.32$  (8:1 petroleum ether: ethyl acetate).  $^1\text{H NMR}$  (400 MHz,  $\text{CDCl}_3$ )  $\delta$  8.17 (d,  $J = 5.2$  Hz, 2H), 7.89 (d,  $J = 6.8$  Hz, 2H), 7.47 (s, 3H), 7.34 (d,  $J = 6.9$  Hz, 2H), 6.11 (s, 2H), 2.45 (s, 3H).  $^{13}\text{C NMR}$  (100 MHz,  $\text{CDCl}_3$ )  $\delta$  188.5, 145.9, 130.4, 129.9, 129.2, 128.9, 128.4, 128.3, 127.3, 127.0, 58.1, 21.9. HR-MS (ESI)  $m/z$  calcd for  $\text{C}_{16}\text{H}_{15}\text{N}_4\text{O}$   $[\text{M}+\text{H}]^+$  279.1240, found 279.1236. IR (KBr): 3058, 2981, 2947, 1694, 1604, 1530, 1451, 1348, 1233, 1039, 810, 726, 695  $\text{cm}^{-1}$ .

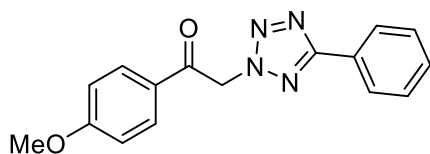

**1-(4-Methoxyphenyl)-2-(5-phenyl-2H-tetrazol-2-yl)ethan-1-one (3p):** The general procedure was followed using substrate 1-(4-methoxyphenyl)ethan-1-one **1a** (1.5 mmol, 225 mg) and 5-phenyltetrazole **2a** (0.50 mmol, 73 mg). Isolation by column chromatography (PE/EtOAc: 15/1 → 8/1) yielded **3p** (145 mg, 98%) as a white solid.  $R_f = 0.33$  (8:1 petroleum ether: ethyl acetate).  $^1\text{H NMR}$  (400 MHz,  $\text{CDCl}_3$ )  $\delta$  8.17 (m, 2H), 7.98 (dd,  $J = 9.0, 2.4$  Hz, 2H), 7.48 (dd,  $J = 4.5, 2.8$  Hz, 3H), 7.01 (dd,  $J = 9.0, 2.4$  Hz, 2H), 6.08 (s, 2H), 3.91 (s, 3H).  $^{13}\text{C NMR}$  (100 MHz,  $\text{CDCl}_3$ )  $\delta$  187.3, 165.6, 164.7, 130.6, 130.4, 128.9, 127.3, 127.0, 126.8, 114.4, 57.9, 55.7. HR-MS (ESI)  $m/z$  calcd for  $\text{C}_{16}\text{H}_{15}\text{N}_4\text{O}_2$   $[\text{M}+\text{H}]^+$  295.1190, found 295.1180. Analytical data for compound **3p** is consistent with literature report.<sup>[2]</sup>

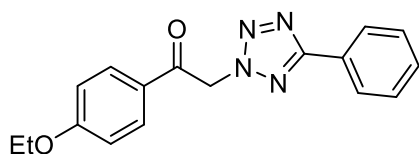

**1-(4-Ethoxyphenyl)-2-(5-phenyl-2H-tetrazol-2-yl)ethan-1-one (3q):** The general procedure was followed using substrate 1-(4-ethoxyphenyl)ethan-1-one **1a** (1.5 mmol, 246 mg) and 5-phenyltetrazole **2a** (0.50 mmol, 73 mg). Isolation by column chromatography (PE/EtOAc: 15/1→8/1) yielded **3q** (97 mg, 63%) as a white solid. m.p: 133.0-134.8°C.  $R_f = 0.33$  (8:1 petroleum ether: ethyl acetate).  $^1\text{H}$  NMR (400 MHz,  $\text{CDCl}_3$ )  $\delta$  8.23 – 8.14 (m, 2H), 7.97 (d,  $J = 7.0$  Hz, 2H), 7.58 – 7.44 (m, 3H), 7.04 – 6.94 (m, 2H), 6.08 (s, 2H), 4.18 – 4.10 (m, 2H), 1.47 (t,  $J = 7.0$  Hz, 3H).  $^{13}\text{C}$  NMR (100 MHz,  $\text{CDCl}_3$ )  $\delta$  187.3, 165.6, 164.1, 130.6, 130.4, 128.9, 127.3, 127.0, 126.6, 114.8, 64.0, 57.9, 14.6. HR-MS (ESI)  $m/z$  calcd for  $\text{C}_{17}\text{H}_{17}\text{N}_4\text{O}_2$   $[\text{M}+\text{H}]^+$  309.1346, found 309.1341. IR (KBr): 3053, 2992, 2949, 1675, 1601, 1448, 1346, 1249, 1186, 921, 842, 729, 669  $\text{cm}^{-1}$ .

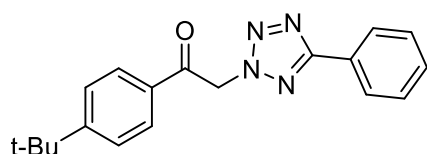

**1-[4-(tert-Butyl)phenyl]-2-(5-phenyl-2H-tetrazol-2-yl)ethan-1-one (3r):** The general procedure was followed using substrate 1-[4-(tert-butyl)phenyl]ethan-1-one **1a** (1.5 mmol, 264 mg) and 5-phenyltetrazole **2a** (0.50 mmol, 73 mg). Isolation by column chromatography (PE/EtOAc: 13/1→8/1) yielded **3r** (146 mg, 91%) as a white solid. m.p: 147.2-149.1°C.  $R_f = 0.30$  (8:1 petroleum ether: ethyl acetate).  $^1\text{H}$  NMR (400 MHz,  $\text{CDCl}_3$ )  $\delta$  8.20 – 8.15 (m, 2H), 7.95 (d,  $J = 8.4$  Hz, 2H), 7.56 (d,  $J = 8.4$  Hz, 2H), 7.49 (dd,  $J = 5.1, 2.2$  Hz, 3H), 6.12 (s, 2H), 1.37 (s, 9H).  $^{13}\text{C}$  NMR (100 MHz,  $\text{CDCl}_3$ )  $\delta$  188.5, 165.6, 158.8, 131.3, 130.4, 128.9, 128.2, 127.3, 127.0, 126.2, 58.1, 35.4, 31.0. HR-MS (ESI)  $m/z$  calcd for  $\text{C}_{19}\text{H}_{21}\text{N}_4\text{O}$   $[\text{M}+\text{H}]^+$  321.1710, found 321.1707. IR (KBr): 3433, 3076, 2966, 1689, 1604, 1448, 1344, 1235, 1107, 996, 831, 729, 691  $\text{cm}^{-1}$ .

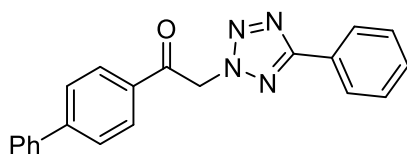

**1-([1,1'-Biphenyl]-4-yl)-2-(5-phenyl-2H-tetrazol-2-yl)ethan-1-one (3s):** The general procedure was followed using substrate 1-([1,1'-biphenyl]-4-yl)ethan-1-one **1a** (1.5 mmol, 294 mg) and 5-phenyltetrazole **2a** (0.50 mmol, 73 mg). Isolation by column chromatography (PE/EtOAc: 30/1→10/1) yielded **3s** (84 mg, 50%) as a white solid. m.p: 130.1-131.8°C.  $R_f = 0.30$  (8:1 petroleum ether: ethyl acetate).  $^1\text{H}$  NMR (400 MHz,  $\text{CDCl}_3$ )  $\delta$  8.23 – 8.14 (m, 2H), 8.07 (d,  $J = 5.8$  Hz, 2H), 7.81 – 7.72 (m, 2H), 7.65 (d,  $J = 6.3$  Hz, 3H), 7.54 – 7.46 (m, 5H), 6.17 (s, 2H).  $^{13}\text{C}$  NMR (100 MHz,  $\text{CDCl}_3$ )  $\delta$  188.5, 165.7, 147.4, 139.3, 132.5, 130.4, 129.1, 128.9, 128.8, 128.7, 127.8, 127.3, 127.3, 127.0, 58.2. HR-MS (ESI)  $m/z$  calcd for  $\text{C}_{21}\text{H}_{17}\text{N}_4\text{O}$   $[\text{M}+\text{H}]^+$  341.1397, found 341.1393. IR (KBr): 3000, 2950, 1699, 1602, 1450, 1339, 1231, 994, 730, 693  $\text{cm}^{-1}$ .

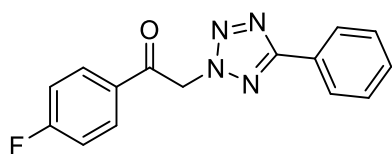

**1-(4-Fluorophenyl)-2-(5-phenyl-2H-tetrazol-2-yl)ethan-1-one (3t):** The general procedure was followed using substrate 1-(4-fluorophenyl)ethan-1-one **1a** (1.5 mmol, 207 mg) and 5-phenyltetrazole **2a** (0.50 mmol, 73 mg). Isolation by column chromatography (PE/EtOAc: 15/1→10/1) yielded **3t** (98 mg, 69%) as a white solid. m.p: 141.0-142.4°C.  $R_f = 0.30$  (8:1 petroleum ether: ethyl acetate).  $^1\text{H}$  NMR (400 MHz,  $\text{CDCl}_3$ )  $\delta$  8.15 (dd,  $J = 6.2, 3.3$  Hz, 2H), 8.03 (dd,  $J = 8.7, 5.0$  Hz, 2H), 7.48 (d,  $J = 4.9$  Hz, 3H), 7.25 – 7.17 (m, 2H), 6.10 (s, 2H).  $^{13}\text{C}$  NMR (100 MHz,  $\text{CDCl}_3$ )  $\delta$  187.5, 166.8 (d,  $^1J_{\text{C-F}} = 258.6$  Hz), 165.7, 131.0 (d,  $^3J_{\text{C-F}} = 9.7$  Hz), 130.5, 130.3 (d,  $^4J_{\text{C-F}} = 2.9$  Hz), 128.9, 127.1, 127.0, 116.5 (d,  $^2J_{\text{C-F}} = 22.2$  Hz), 58.0. HR-MS (ESI)  $m/z$  calcd for  $\text{C}_{15}\text{H}_{12}\text{FN}_4\text{O}$   $[\text{M}+\text{H}]^+$  283.0990, found 283.0986. IR (KBr): 3072, 2980, 2933, 1694, 1596, 1454, 1353, 1235, 1156, 997, 830, 729, 591  $\text{cm}^{-1}$ .



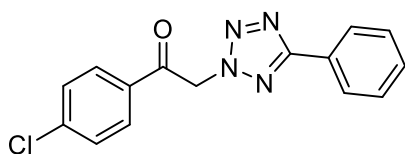

**1-(4-Chlorophenyl)-2-(5-phenyl-2H-tetrazol-2-yl)ethan-1-one (3u):** The general procedure was followed using substrate 1-(4-chlorophenyl)ethan-1-one **1a** (1.5 mmol, 232 mg) and 5-phenyltetrazole **2a** (0.50 mmol, 73 mg). Isolation by column chromatography (PE/EtOAc: 20/1→10/1) yielded **3u** (109 mg, 73%) as a white solid.  $R_f = 0.30$  (8:1 petroleum ether: ethyl acetate).  $^1\text{H}$  NMR (400 MHz,  $\text{CDCl}_3$ )  $\delta$  8.16 (dd,  $J = 4.5, 3.3$  Hz, 2H), 7.94 (d,  $J = 8.6$  Hz, 2H), 7.56 – 7.43 (m, 5H), 6.10 (s, 2H).  $^{13}\text{C}$  NMR (100 MHz,  $\text{CDCl}_3$ )  $\delta$  187.9, 165.7, 141.4, 132.1, 130.5, 129.6, 129.6, 128.9, 127.1, 127.0, 58.1. HR-MS (ESI)  $m/z$  calcd for  $\text{C}_{15}\text{H}_{12}\text{ClN}_4\text{O}$   $[\text{M}+\text{H}]^+$  299.0694, found 299.0684. Analytical data for compound **3u** is consistent with literature report.<sup>[2]</sup>

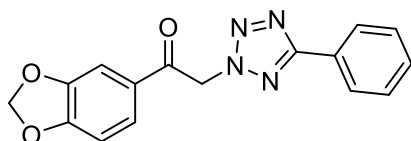

**1-(Benzo[d][1,3]dioxol-5-yl)-2-(5-phenyl-2H-tetrazol-2-yl)ethan-1-one (3v):** The general procedure was followed using substrate 1-(benzo[d][1,3]dioxol-5-yl)ethan-1-one **1a** (1.5 mmol, 246 mg) and 5-phenyltetrazole **2a** (0.50 mmol, 73 mg). Isolation by column chromatography (PE/EtOAc: 20/1→8/1) yielded **3v** (76 mg, 49%) as a white solid. m.p: 122.9-124.7°C.  $R_f = 0.32$  (6:1 petroleum ether: ethyl acetate).  $^1\text{H}$  NMR (400 MHz,  $\text{CDCl}_3$ )  $\delta$  8.16 (s, 2H), 7.59 (d,  $J = 8.1$  Hz, 1H), 7.46 (d,  $J = 9.7$  Hz, 4H), 6.93 (d,  $J = 8.1$  Hz, 1H), 6.10 (s, 2H), 6.06 (s, 2H).  $^{13}\text{C}$  NMR (100 MHz,  $\text{CDCl}_3$ )  $\delta$  186.9, 165.6, 153.2, 148.8, 130.4, 128.9, 128.5, 127.3, 127.0, 124.7, 108.4, 107.8, 102.3, 57.9. HR-MS (ESI)  $m/z$  calcd for  $\text{C}_{16}\text{H}_{13}\text{N}_4\text{O}_3$   $[\text{M}+\text{H}]^+$  309.0982, found 309.0977. IR (KBr): 3072, 2986, 2945, 2900, 1679, 1602, 1504, 1450, 1344, 1256, 1106, 1041, 937, 892, 811, 734  $\text{cm}^{-1}$ .

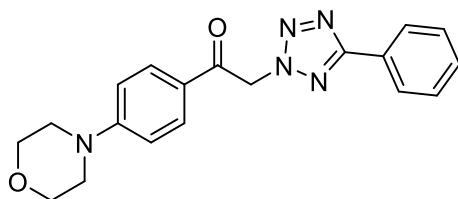

**1-(4-Morpholinophenyl)-2-(5-phenyl-2H-tetrazol-2-yl)ethan-1-one (3w):** The general procedure was followed using substrate 1-(4-morpholinophenyl)ethan-1-one **1a** (1.0 mmol, 205 mg) and 5-phenyltetrazole **2a** (0.50 mmol, 73 mg). Isolation by column chromatography (PE/EtOAc: 13/1→6/1) yielded **3w** (33 mg, 20%) as a light yellow solid. m.p: 176.4-179.0°C.  $R_f = 0.32$  (6:1 petroleum ether: ethyl acetate).  $^1\text{H}$  NMR (400 MHz,  $\text{CDCl}_3$ )  $\delta$  8.16 (s, 2H), 7.91 (d,  $J = 7.9$  Hz, 2H), 7.47 (s, 3H), 6.91 (d,  $J = 7.9$  Hz, 2H), 6.06 (s, 2H), 3.86 (s, 4H), 3.37 (s, 4H).  $^{13}\text{C}$  NMR (100 MHz,  $\text{CDCl}_3$ )  $\delta$  186.7, 165.5, 155.0, 130.4, 130.3, 128.9, 127.3, 127.0, 124.0, 113.3, 66.5, 57.8, 47.1. HR-MS (ESI)  $m/z$  calcd for  $\text{C}_{19}\text{H}_{20}\text{N}_5\text{O}_2$   $[\text{M}+\text{H}]^+$  350.1612, found 350.1608. IR (KBr): 3080, 2911, 2863, 1662, 1599, 1430, 1235, 1103, 1022, 979, 876, 751, 667  $\text{cm}^{-1}$ .

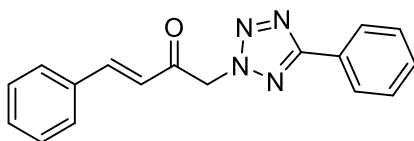

**(E)-4-Phenyl-1-(5-phenyl-2H-tetrazol-2-yl)but-3-en-2-one (3x):** The general procedure was followed using substrate (*E*)-4-phenylbut-3-en-2-one **1a** (1.5 mmol, 150 mg) and 5-phenyltetrazole **2a** (0.50 mmol, 73 mg). Isolation by column chromatography (PE/EtOAc: 22/1→10/1) yielded **3x** (36 mg, 36%) as a light yellow solid. m.p: 139.2-140.9°C.  $R_f = 0.32$  (6:1 petroleum ether: ethyl acetate).  $^1\text{H}$  NMR (400 MHz,  $\text{CDCl}_3$ )  $\delta$  8.18 (d,  $J = 4.7$  Hz, 2H), 7.77 (d,  $J = 16.1$  Hz, 1H), 7.60 – 7.37 (m, 8H), 6.76 (d,  $J = 16.1$  Hz, 1H), 5.74 (s, 2H).  $^{13}\text{C}$  NMR (100 MHz,  $\text{CDCl}_3$ )  $\delta$  188.7, 165.7, 146.2, 133.6, 131.6, 130.5, 129.2, 128.9, 128.8, 127.2, 127.0, 121.1, 59.6. HR-MS (ESI)  $m/z$  calcd for  $\text{C}_{17}\text{H}_{15}\text{N}_4\text{O}$   $[\text{M}+\text{H}]^+$  291.1240, found 291.1230. IR (KBr): 3060, 2954, 1689, 1610, 1452, 1342, 1192, 1039, 978, 741, 698  $\text{cm}^{-1}$ .

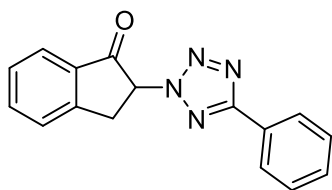

**2-(5-Phenyl-2H-tetrazol-2-yl)-2,3-dihydro-1H-inden-1-one (3y):** The general procedure was followed using substrate 2,3-dihydro-1H-inden-1-one **1a** (1.5 mmol, 198 mg) and 5-phenyltetrazole **2a** (0.50 mmol, 73 mg). Isolation by column chromatography (PE/EtOAc: 16/1 → 8/1) yielded **3y** (68 mg, 49%) as a yellow liquid.  $R_f = 0.30$  (6:1 petroleum ether: ethyl acetate).  $^1\text{H NMR}$  (400 MHz,  $\text{CDCl}_3$ )  $\delta$  8.12 (dd,  $J = 6.5, 2.8$  Hz, 2H), 7.90 (d,  $J = 7.7$  Hz, 1H), 7.76 (dd,  $J = 7.5, 7.5$  Hz, 1H), 7.59 (d,  $J = 7.7$  Hz, 1H), 7.52 (dd,  $J = 7.5, 7.5$  Hz, 1H), 7.49 – 7.44 (m, 3H), 5.89 (dd,  $J = 8.5, 5.5$  Hz, 1H), 3.95 (dd,  $J = 17.1, 8.6$  Hz, 1H), 3.82 (dd,  $J = 17.1, 5.4$  Hz, 1H).  $^{13}\text{C NMR}$  (100 MHz,  $\text{CDCl}_3$ )  $\delta$  196.3, 165.7, 150.8, 136.6, 133.7, 130.4, 128.8, 128.8, 127.2, 127.0, 126.7, 125.3, 65.7, 33.5. HR-MS (ESI)  $m/z$  calcd for  $\text{C}_{16}\text{H}_{13}\text{N}_4\text{O}$   $[\text{M}+\text{H}]^+$  277.1084, found 277.1082. IR (KBr): 2961, 2917, 2848, 1723, 1608, 1461, 1267, 1208, 1016, 790, 736, 698  $\text{cm}^{-1}$ .

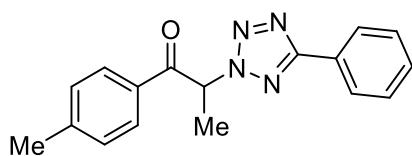

**2-(5-Phenyl-2H-tetrazol-2-yl)-1-(p-tolyl)propan-1-one (3z):** The general procedure was followed using substrate 1-(p-tolyl)propan-1-one **1a** (1.5 mmol, 222 mg) and 5-phenyltetrazole **2a** (0.50 mmol, 73 mg). Isolation by column chromatography (PE/EtOAc: 30/1 → 10/1) yielded **3z** (101 mg, 69%) as a white solid. m.p: 121.3-123.1°C.  $R_f = 0.30$  (6:1 petroleum ether: ethyl acetate).  $^1\text{H NMR}$  (400 MHz,  $\text{CDCl}_3$ )  $\delta$  8.17 – 8.09 (m, 2H), 7.87 (d,  $J = 7.8$  Hz, 2H), 7.45 (s, 3H), 7.28 (s, 2H), 6.53 (q,  $J = 7.0$  Hz, 1H), 2.41 (s, 3H), 2.04 (d,  $J = 7.1$  Hz, 3H).  $^{13}\text{C NMR}$  (100 MHz,  $\text{CDCl}_3$ )  $\delta$  191.8, 165.2, 145.3, 131.3, 131.2, 130.3, 129.8, 128.8, 127.32, 127.0, 63.0, 21.7, 17.0. HR-MS (ESI)  $m/z$  calcd for  $\text{C}_{17}\text{H}_{17}\text{N}_4\text{O}$   $[\text{M}+\text{H}]^+$  293.1397, found 293.1395. IR (KBr): 3090, 2991, 1802, 1604, 1445, 1256, 1143, 1055, 989, 977, 856, 752, 647  $\text{cm}^{-1}$ .

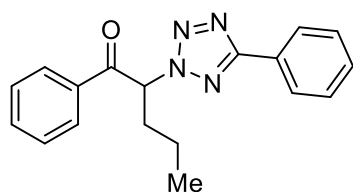

**1-Phenyl-2-(5-phenyl-2H-tetrazol-2-yl)pentan-1-one (3aa):** The general procedure was followed using substrate 1-phenylpentan-1-one **1a** (1.5 mmol, 243 mg) and 5-phenyltetrazole **2a** (0.50 mmol, 73 mg). Isolation by column chromatography (PE/EtOAc: 20/1→10/1) yielded **3aa** (130 mg, 85%) as a yellow liquid.  $R_f = 0.32$  (6:1 petroleum ether: ethyl acetate).  $^1\text{H}$  NMR (400 MHz,  $\text{CDCl}_3$ )  $\delta$  8.14 (s, 2H), 7.98 (d,  $J = 7.6$  Hz, 2H), 7.60 (dd,  $J = 7.2, 7.2$  Hz, 1H), 7.52 – 7.41 (m, 5H), 6.46 (dd,  $J = 9.9, 3.0$  Hz, 1H), 2.69 – 2.19 (m, 2H), 1.48 – 1.33 (m, 2H), 1.01 (t,  $J = 6.9$  Hz, 3H).  $^{13}\text{C}$  NMR (100 MHz,  $\text{CDCl}_3$ )  $\delta$  192.0, 165.3, 134.3, 134.2, 130.4, 129.1, 128.8, 128.6, 127.3, 127.0, 67.3, 32.8, 19.3, 13.5. HR-MS (ESI)  $m/z$  calcd for  $\text{C}_{18}\text{H}_{19}\text{N}_4\text{O}$   $[\text{M}+\text{H}]^+$  307.1553, found 307.1553. Analytical data for compound **3aa** is consistent with literature report.<sup>[3]</sup>

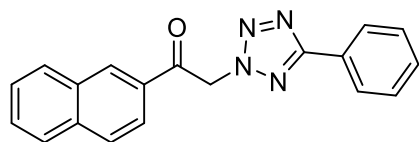

**1-(Naphthalen-2-yl)-2-(5-phenyl-2H-tetrazol-2-yl)ethan-1-one (3ba):** The general procedure was followed using substrate 1-(naphthalen-2-yl)ethan-1-one **1a** (1.5 mmol, 255 mg) and 5-phenyltetrazole **2a** (0.50 mmol, 73 mg). Isolation by column chromatography (PE/EtOAc: 15/1→10/1) yielded **3ba** (139 mg, 88%) as a white solid. m.p: 203.1-205.1°C.  $R_f = 0.33$  (6:1 petroleum ether: ethyl acetate).  $^1\text{H}$  NMR (400 MHz,  $\text{CDCl}_3$ )  $\delta$  8.54 (s, 1H), 8.19 (d,  $J = 7.0$  Hz, 2H), 8.08 – 7.89 (m, 4H), 7.66 (dd,  $J = 16.3, 7.4$  Hz, 2H), 7.49 (d,  $J = 2.3$  Hz, 3H), 6.28 (s, 2H).  $^{13}\text{C}$  NMR (100 MHz,  $\text{CDCl}_3$ )  $\delta$  188.9, 165.7, 136.2, 132.4, 131.2, 130.4, 130.2, 129.7, 129.4, 129.3, 128.9, 128.0, 127.4, 127.3, 127.0, 123.3, 58.2. HR-MS (ESI)  $m/z$  calcd for  $\text{C}_{19}\text{H}_{15}\text{N}_4\text{O}$   $[\text{M}+\text{H}]^+$  315.1240, found 315.1235. IR (KBr): 3036, 2956, 1696, 1627, 1450, 1353, 1277, 1193, 1043, 861, 818, 737  $\text{cm}^{-1}$ .

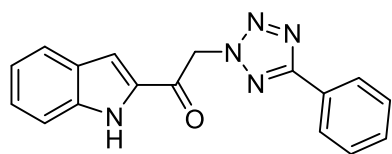

**1-(1*H*-indol-2-yl)-2-(5-phenyl-2*H*-tetrazol-2-yl)ethan-1-one (3ca):** The general procedure was followed using substrate 1-(1*H*-indol-2-yl)ethan-1-one **1a** (1.5 mmol, 234 mg) and 5-phenyltetrazole **2a** (0.50 mmol, 73 mg). Isolation by column chromatography (PE/EtOAc: 15/1→8/1) yielded **3ca** (39 mg, 25%) as a white solid.  $R_f = 0.33$  (4:1 petroleum ether: ethyl acetate).  $^1\text{H}$  NMR (400 MHz,  $\text{CDCl}_3$ )  $\delta$  9.21 (s, 1H), 8.18 (d,  $J = 4.6$  Hz, 2H), 7.75 (d,  $J = 8.0$  Hz, 1H), 7.57 – 7.32 (m, 6H), 7.20 (dd,  $J = 8.0, 8.0$  Hz, 1H), 6.10 (s, 2H).  $^{13}\text{C}$  NMR (100 MHz,  $\text{DMSO}-d_6$ )  $\delta$  183.5, 164.8, 138.8, 132.8, 131.2, 129.8, 127.2, 126.9, 126.9, 123.5, 121.2, 113.4, 111.8, 100.0, 58.4. HR-MS (ESI)  $m/z$  calcd for  $\text{C}_{17}\text{H}_{14}\text{N}_5\text{O}$   $[\text{M}+\text{H}]^+$  304.1193, found 304.1187. IR (KBr): 3324, 2962, 2928, 2849, 1667, 1525, 1383, 1262, 1093, 807, 738, 688  $\text{cm}^{-1}$ .

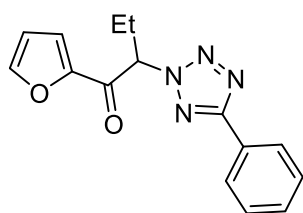

**1-(Furan-2-yl)-2-(5-phenyl-2*H*-tetrazol-2-yl)butan-1-one (3da):** The general procedure was followed using substrate 1-(furan-2-yl)butan-1-one **1a** (1.5 mmol, 207 mg) and 5-phenyltetrazole **2a** (0.50 mmol, 73 mg). Isolation by column chromatography (PE/EtOAc: 22/1→10/1) yielded **3da** (105 mg, 74%) as a white liquid.  $R_f = 0.30$  (6:1 petroleum ether: ethyl acetate).  $^1\text{H}$  NMR (400 MHz,  $\text{CDCl}_3$ )  $\delta$  8.23 – 8.10 (m, 2H), 7.62 (s, 1H), 7.46 (s, 3H), 7.31 (s, 1H), 6.57 (s, 1H), 6.13 (dd,  $J = 8.7, 5.2$  Hz, 1H), 2.53 (dq,  $J = 22.5, 7.1$  Hz, 2H), 1.05 (t,  $J = 7.1$  Hz, 3H).  $^{13}\text{C}$  NMR (100 MHz,  $\text{CDCl}_3$ )  $\delta$  180.5, 165.3, 150.4, 147.6, 130.4, 128.8, 127.3, 127.0, 119.7, 113.0, 69.1, 24.1, 10.6. HR-MS (ESI)  $m/z$  calcd for  $\text{C}_{15}\text{H}_{15}\text{N}_4\text{O}_2$   $[\text{M}+\text{H}]^+$  283.1190, found 283.1189. IR (KBr): 3107, 2974, 2880, 1667, 1563, 1469, 1465, 1317, 1240, 1160, 1054, 998, 926, 797, 689  $\text{cm}^{-1}$ .

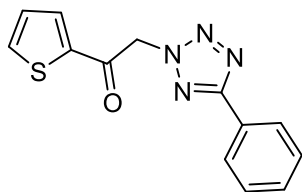

**2-(5-Phenyl-2H-tetrazol-2-yl)-1-(thiophen-2-yl)ethan-1-one (3ea):** The general procedure was followed using substrate 1-(thiophen-2-yl)ethan-1-one **1a** (1.5 mmol, 189 mg) and 5-phenyltetrazole **2a** (0.50 mmol, 73 mg). Isolation by column chromatography (PE/EtOAc: 18/1→10/1) yielded **3ea** (54 mg, 59%) as a white solid. m.p: 120.9-122.5°C.  $R_f = 0.30$  (6:1 petroleum ether: ethyl acetate).  $^1\text{H}$  NMR (400 MHz,  $\text{CDCl}_3$ )  $\delta$  8.17 (d,  $J = 5.2$  Hz, 2H), 7.82 (dd,  $J = 14.1, 4.3$  Hz, 2H), 7.49 (d,  $J = 5.0$  Hz, 3H), 7.25 – 7.20 (m, 1H), 6.04 (s, 2H).  $^{13}\text{C}$  NMR (100 MHz,  $\text{CDCl}_3$ )  $\delta$  181.7, 165.7, 140.1, 135.8, 133.0, 130.5, 128.9, 128.7, 127.1, 127.0, 58.0. HR-MS (ESI)  $m/z$  calcd for  $\text{C}_{13}\text{H}_{11}\text{N}_4\text{OS}$   $[\text{M}+\text{H}]^+$  271.0648, found 271.0640. IR (KBr): 3079, 2954, 1692, 1516, 1469, 1405, 1240, 1043, 937, 797, 742  $\text{cm}^{-1}$ .

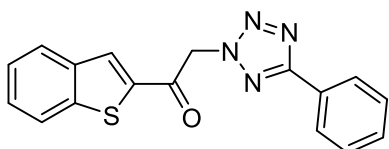

**1-(Benzo[b]thiophen-2-yl)-2-(5-phenyl-2H-tetrazol-2-yl)ethan-1-one (3fa):** The general procedure was followed using substrate 1-(benzo[b]thiophen-2-yl)ethan-1-one **1a** (1.5 mmol, 264 mg) and 5-phenyltetrazole **2a** (0.50 mmol, 73 mg). Isolation by column chromatography (PE/EtOAc: 18/1→10/1) yielded **3fa** (150 mg, 93%) as a yellow solid. m.p: 171.8-173.7°C.  $R_f = 0.30$  (6:1 petroleum ether: ethyl acetate).  $^1\text{H}$  NMR (400 MHz,  $\text{CDCl}_3$ )  $\delta$  8.21 – 8.15 (m, 2H), 8.11 (s, 1H), 7.94 (dd,  $J = 19.3, 8.1$  Hz, 2H), 7.58 – 7.44 (m, 5H), 6.15 (s, 2H).  $^{13}\text{C}$  NMR (100 MHz,  $\text{CDCl}_3$ )  $\delta$  183.2, 165.8, 142.9, 139.4, 138.7, 130.5, 130.4, 128.9, 128.5, 127.1, 127.0, 126.4, 125.6, 123.1, 58.0. HR-MS (ESI)  $m/z$  calcd for  $\text{C}_{17}\text{H}_{13}\text{N}_4\text{OS}$   $[\text{M}+\text{H}]^+$  321.0805, found 321.0798. IR (KBr): 2973, 2891, 1683, 1593, 1513, 1469, 1450, 1341, 1233, 1176, 1041, 839, 738, 700  $\text{cm}^{-1}$ .

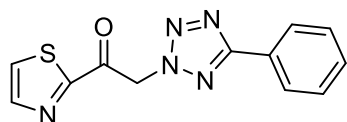

**2-(5-Phenyl-2H-tetrazol-2-yl)-1-(thiazol-2-yl)ethan-1-one (3ga):** The general procedure was followed using substrate 1-(thiazol-2-yl)ethan-1-one **1a** (1.5 mmol, 191 mg) and 5-phenyltetrazole **2a** (0.50 mmol, 73 mg). Isolation by column chromatography (PE/EtOAc: 12/1→8/1) yielded **3ga** (93 mg, 68%) as a light yellow solid. m.p: 97.2-99.4°C.  $R_f = 0.30$  (6:1 petroleum ether: ethyl acetate).  $^1\text{H}$  NMR (400 MHz,  $\text{CDCl}_3$ )  $\delta$  8.24 – 8.10 (m, 3H), 7.90 – 7.83 (m, 1H), 7.55 – 7.45 (m, 3H), 6.34 (s, 2H).  $^{13}\text{C}$  NMR (100 MHz,  $\text{CDCl}_3$ )  $\delta$  182.9, 165.7, 162.9, 145.5, 130.5, 128.9, 127.9, 127.2, 127.0, 58.0. HR-MS (ESI)  $m/z$  calcd for  $\text{C}_{12}\text{H}_{10}\text{N}_5\text{OS}$   $[\text{M}+\text{H}]^+$  272.0601, found 272.0595. IR (KBr): 3041, 3122, 3090, 2985, 2954, 1702, 1527, 1248, 1154, 1047, 950, 834, 734, 695  $\text{cm}^{-1}$ .

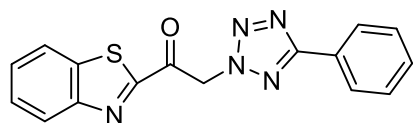

**1-(Benzo[d]thiazol-2-yl)-2-(5-phenyl-2H-tetrazol-2-yl)ethan-1-one (3ha):** The general procedure was followed using substrate 1-(benzo[d]thiazol-2-yl)ethan-1-one **1a** (1.5 mmol, 265 mg) and 5-phenyltetrazole **2a** (0.50 mmol, 73 mg). Isolation by column chromatography (PE/EtOAc: 20/1→8/1) yielded **3ha** (78 mg, 40%) as a light yellow solid. m.p: 186.8-188.9°C.  $R_f = 0.32$  (6:1 petroleum ether: ethyl acetate).  $^1\text{H}$  NMR (400 MHz,  $\text{CDCl}_3$ )  $\delta$  8.26 (d,  $J = 7.6$  Hz, 1H), 8.19 (s, 2H), 8.04 (d,  $J = 7.8$  Hz, 1H), 7.70 – 7.56 (m, 2H), 7.49 (s, 3H), 6.46 (s, 2H).  $^{13}\text{C}$  NMR (100 MHz,  $\text{CDCl}_3$ )  $\delta$  184.5, 165.8, 162.3, 153.3, 137.39, 130.5, 128.9, 128.7, 127.6, 127.2, 127.0, 125.8, 122.6, 58.1. HR-MS (ESI)  $m/z$  calcd for  $\text{C}_{16}\text{H}_{12}\text{N}_5\text{OS}$   $[\text{M}+\text{H}]^+$  322.0757, found 322.0750. IR (KBr): 3081, 3001, 2959, 1718, 1450, 1346, 1043, 949, 836, 734, 689  $\text{cm}^{-1}$ .

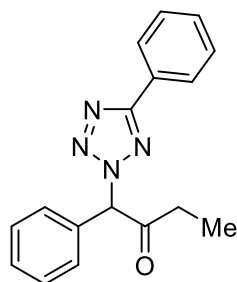

**1-Phenyl-1-(5-phenyl-2H-tetrazol-2-yl)butan-2-one (3ia):** The general procedure was followed using substrate 1-phenylbutan-2-one **1a** (1.5 mmol, 222 mg) and 5-phenyltetrazole **2a** (0.50 mmol, 73 mg). Isolation by column chromatography (PE/EtOAc: 20/1 → 10/1) yielded **3ia** (143 mg, 91%) as a yellow liquid.  $R_f = 0.32$  (6:1 petroleum ether: ethyl acetate).  $^1\text{H NMR}$  (400 MHz,  $\text{CDCl}_3$ )  $\delta$  8.14 (s, 2H), 7.53 (d,  $J = 51.7$  Hz, 8H), 6.66 (s, 1H), 2.60 – 2.44 (m, 2H), 1.10 (t,  $J = 6.7$  Hz, 3H).  $^{13}\text{C NMR}$  (100 MHz,  $\text{CDCl}_3$ )  $\delta$  201.4, 165.2, 131.3, 130.4, 130.0, 129.9, 129.3, 128.8, 127.3, 127.0, 75.2, 33.4, 7.7. HR-MS (ESI)  $m/z$  calcd for  $\text{C}_{17}\text{H}_{17}\text{N}_4\text{O}$   $[\text{M}+\text{H}]^+$  293.1397, found 293.1397. IR (KBr): 3060, 2954, 1734, 1450, 1355, 1204, 1102, 1050, 928, 815  $\text{cm}^{-1}$ .

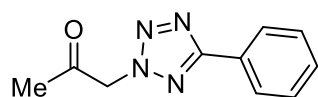

**1-(5-Phenyl-2H-tetrazol-2-yl)propan-2-one (3ja):** The general procedure was followed using substrate propan-2-one **1a** (1.5 mmol, 87 mg) and 5-phenyltetrazole **2a** (0.50 mmol, 73 mg). Isolation by column chromatography (PE/EtOAc: 15/1 → 10/1) yielded **3ja** (47 mg, 48%) as a white solid.  $R_f = 0.33$  (6:1 petroleum ether: ethyl acetate).  $^1\text{H NMR}$  (400 MHz,  $\text{CDCl}_3$ )  $\delta$  8.16 (dd,  $J = 6.6, 3.1$  Hz, 2H), 7.53 – 7.47 (m, 3H), 5.48 (s, 2H), 2.25 (s, 3H).  $^{13}\text{C NMR}$  (100 MHz,  $\text{CDCl}_3$ )  $\delta$  197.8, 165.8, 130.6, 128.9, 127.0, 127.0, 61.0, 27.1. HR-MS (ESI)  $m/z$  calcd for  $\text{C}_{10}\text{H}_{11}\text{N}_4\text{O}$   $[\text{M}+\text{H}]^+$  203.0927, found 203.0925. Analytical data for compound **3ja** is consistent with literature report.<sup>[3]</sup>



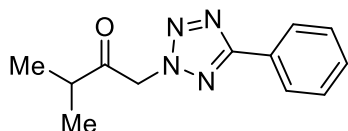

**3-Methyl-1-(5-phenyl-2H-tetrazol-2-yl)butan-2-one (3ka):** The general procedure was followed using substrate 3-methylbutan-2-one **1a** (1.5 mmol, 129 mg) and 5-phenyltetrazole **2a** (0.50 mmol, 73 mg). Isolation by column chromatography (PE/EtOAc: 15/1 → 10/1) yielded **3ka** (39 mg, 34%) as a white solid. m.p: 99.6-100.9°C.  $R_f = 0.33$  (8:1 petroleum ether: ethyl acetate).  $^1\text{H}$  NMR (400 MHz,  $\text{CDCl}_3$ )  $\delta$  8.15 (d,  $J = 6.9$  Hz, 2H), 7.49 (d,  $J = 4.7$  Hz, 3H), 5.56 (s, 2H), 2.75 (p,  $J = 6.8$  Hz, 1H), 1.23 (d,  $J = 6.9$  Hz, 6H).  $^{13}\text{C}$  NMR (100 MHz,  $\text{CDCl}_3$ )  $\delta$  203.4, 165.6, 130.5, 128.9, 127.1, 127.0, 58.8, 38.7, 17.9. HR-MS (ESI)  $m/z$  calcd for  $\text{C}_{12}\text{H}_{15}\text{N}_4\text{O}$   $[\text{M}+\text{H}]^+$  231.1240, found 231.1242. IR (KBr): 2997, 2979, 2877, 1721, 1529, 1469, 1346, 1200, 1050, 829, 730, 693  $\text{cm}^{-1}$ .

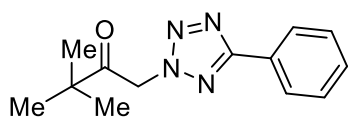

**3,3-Dimethyl-1-(5-phenyl-2H-tetrazol-2-yl)butan-2-one (3la):** The general procedure was followed using substrate 3,3-dimethylbutan-2-one **1a** (1.5 mmol, 150 mg) and 5-phenyltetrazole **2a** (0.50 mmol, 73 mg). Isolation by column chromatography (PE/EtOAc: 15/1 → 10/1) yielded **3la** (32 mg, 25%) as a white solid.  $R_f = 0.33$  (8:1 petroleum ether: ethyl acetate).  $^1\text{H}$  NMR (400 MHz,  $\text{CDCl}_3$ )  $\delta$  8.14 (s, 2H), 7.47 (s, 3H), 5.67 (s, 2H), 1.32 (s, 9H).  $^{13}\text{C}$  NMR (100 MHz,  $\text{CDCl}_3$ )  $\delta$  204.4, 165.5, 130.4, 128.9, 127.3, 127.0, 56.4, 43.7, 26.2. HR-MS (ESI)  $m/z$  calcd for  $\text{C}_{13}\text{H}_{17}\text{N}_4\text{O}$   $[\text{M}+\text{H}]^+$  245.1397, found 245.1394. Analytical data for compound **3la** is consistent with literature report.<sup>[4]</sup>

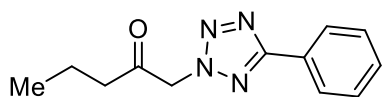

**1-(5-Phenyl-2H-tetrazol-2-yl)pentan-2-one (3ma):** The general procedure was followed using substrate pentan-2-one **1a** (1.5 mmol, 129 mg) and 5-phenyltetrazole

**2a** (0.50 mmol, 73 mg). Isolation by column chromatography (PE/EtOAc: 30/1→10/1) yielded **3ma** (26 mg, 24%) as a white solid. m.p: 86.6-88.5°C.  $R_f = 0.33$  (8:1 petroleum ether: ethyl acetate).  $^1\text{H}$  NMR (400 MHz,  $\text{CDCl}_3$ )  $\delta$  8.20 – 8.13 (m, 2H), 7.49 (s, 3H), 5.46 (s, 2H), 2.46 (t,  $J = 7.2$  Hz, 2H), 1.69 (q,  $J = 7.3$  Hz, 2H), 0.95 (t,  $J = 7.4$  Hz, 3H).  $^{13}\text{C}$  NMR (100 MHz,  $\text{CDCl}_3$ )  $\delta$  200.2, 165.7, 130.5, 128.9, 127.1, 127.0, 60.5, 41.7, 16.6, 13.5. HR-MS (ESI)  $m/z$  calcd for  $\text{C}_{12}\text{H}_{15}\text{N}_4\text{O}$   $[\text{M}+\text{H}]^+$  231.1240, found 231.1232. IR (KBr): 3074, 2963, 2877, 1728, 1529, 1464, 1407, 1265, 1127, 1048, 923, 791  $\text{cm}^{-1}$ .

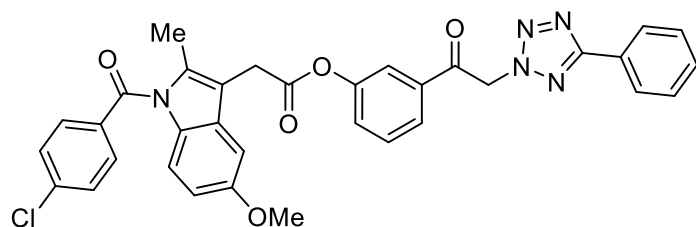

**3-(2-(5-Phenyl-2H-tetrazol-2-yl)acetyl)phenyl-2-(1-(4-chlorobenzoyl)-5-methoxy-2-methyl-1H-indol-3-yl)acetate (3na):** The general procedure was followed using substrate 3-acetylphenyl-2-(1-(4-chlorobenzoyl)-5-methoxy-2-methyl-1H-indol-3-yl)-acetate **1a** (0.4 mmol, 190 mg) and 5-phenyltetrazole **2a** (1.2 mmol, 175 mg). Isolation by column chromatography (PE/EtOAc: 7/1→5/1) yielded **3na** (120 mg, 48%) as a light yellow solid. m.p: 128.3-130.1°C.  $R_f = 0.30$  (3:1 petroleum ether: ethyl acetate).  $^1\text{H}$  NMR (400 MHz,  $\text{CDCl}_3$ )  $\delta$  8.22 – 8.09 (m, 2H), 7.86 (d,  $J = 7.7$  Hz, 1H), 7.75 – 7.64 (m, 3H), 7.61 – 7.44 (m, 6H), 7.40 (d,  $J = 8.0$  Hz, 1H), 7.05 (s, 1H), 6.88 (d,  $J = 9.0$  Hz, 1H), 6.70 (d,  $J = 10.6$  Hz, 1H), 6.09 (s, 2H), 3.95 (s, 2H), 3.84 (s, 3H), 2.47 (s, 3H).  $^{13}\text{C}$  NMR (100 MHz,  $\text{CDCl}_3$ )  $\delta$  188.0, 169.0, 168.3, 165.7, 156.2, 151.3, 139.5, 136.4, 135.1, 133.7, 131.2, 130.9, 130.5, 130.4, 129.2, 128.9, 127.9, 127.1, 127.0, 125.6, 121.3, 115.1, 111.7, 111.5, 101.3, 58.2, 55.8, 30.5, 13.5. HR-MS (ESI)  $m/z$  calcd for  $\text{C}_{34}\text{H}_{27}\text{ClN}_5\text{O}_5$   $[\text{M}+\text{H}]^+$  620.1695, found 620.1695. IR (KBr): 2932, 1758, 1671, 1608, 1362, 1241, 1166, 1068, 734, 693  $\text{cm}^{-1}$ .

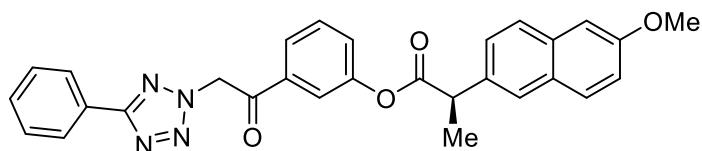

**3-[2-(5-Phenyl-2H-tetrazol-2-yl)acetyl]phenyl(R)-2-(6-methoxynaphthalen-2-yl)propanoate (30a):** The general procedure was followed using substrate 3-acetylphenyl-(R)-2-(6-methoxynaphthalen-2-yl)propanoate **1a** (0.4 mmol, 139 mg) and 5-phenyltetrazole **2a** (1.2 mmol, 175 mg). Isolation by column chromatography (PE/EtOAc: 11/1 → 5/1) yielded **30a** (66 mg, 33%) as a white solid. m.p: 130.2-132.7°C.  $R_f = 0.33$  (3:1 petroleum ether: ethyl acetate).  $^1\text{H}$  NMR (400 MHz,  $\text{CDCl}_3$ )  $\delta$  8.16 (dd,  $J = 6.5, 3.1$  Hz, 2H), 7.82 (d,  $J = 7.7$  Hz, 1H), 7.79 – 7.72 (m, 3H), 7.66 – 7.59 (m, 1H), 7.56 – 7.43 (m, 5H), 7.35 – 7.28 (m, 1H), 7.21 – 7.08 (m, 2H), 6.06 (s, 2H), 4.13 (q,  $J = 7.1$  Hz, 1H), 3.92 (s, 3H), 1.72 (d,  $J = 7.1$  Hz, 3H).  $^{13}\text{C}$  NMR (100 MHz,  $\text{CDCl}_3$ )  $\delta$  188.1, 172.9, 165.7, 157.9, 151.4, 135.0, 134.6, 133.9, 130.5, 130.3, 129.3, 129.0, 128.9, 127.9, 127.6, 127.2, 127.0, 126.3, 125.9, 125.4, 121.3, 119.3, 105.7, 58.1, 55.4, 45.6, 18.4. HR-MS (ESI)  $m/z$  calcd for  $\text{C}_{29}\text{H}_{25}\text{N}_4\text{O}_4$   $[\text{M}+\text{H}]^+$  493.1870, found 493.1870. IR (KBr): 3060, 2990, 2945, 2830, 1755, 1604, 1445, 1256, 1143, 1055, 989, 977, 856, 752, 647  $\text{cm}^{-1}$ .

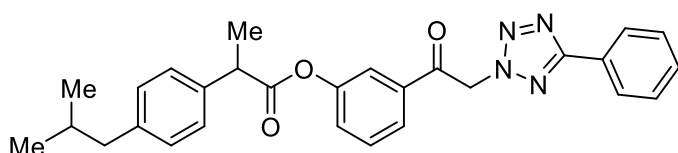

**3-[2-(5-Phenyl-2H-tetrazol-2-yl)acetyl]phenyl-2-(4-isobutylphenyl)propanoate (3pa):** The general procedure was followed using substrate 3-acetylphenyl 2-(4-isobutylphenyl)propanoate **1a** (0.4 mmol, 160 mg) and 5-phenyltetrazole **2a** (1.2 mmol, 175 mg). Isolation by column chromatography (PE/EtOAc: 7/1 → 5/1) yielded **3pa** (67 mg, 28%) as a white solid. m.p: 107.7-110.0°C.  $R_f = 0.31$  (3:1 petroleum ether: ethyl acetate).  $^1\text{H}$  NMR (400 MHz,  $\text{CDCl}_3$ )  $\delta$  8.22 – 8.12 (m, 2H), 7.82 (d,  $J = 7.8$  Hz, 1H), 7.68 – 7.60 (m, 1H), 7.57 – 7.44 (m, 4H), 7.37 – 7.27 (m, 3H), 7.16 (d,  $J = 8.0$  Hz, 2H), 6.08 (s, 2H), 3.97 (q,  $J = 7.1$  Hz, 1H), 2.48 (d,  $J = 7.2$  Hz, 2H), 1.92 – 1.82 (m, 1H), 1.63 (d,  $J = 7.1$  Hz, 3H), 0.91 (d,  $J = 6.6$  Hz, 6H).  $^{13}\text{C}$  NMR (100 MHz,  $\text{CDCl}_3$ )

$\delta$  188.1, 173.0, 165.7, 151.5, 141.1, 136.8, 135.0, 130.5, 130.2, 129.7, 129.4, 128.9, 128.0, 127.2, 127.0, 125.4, 121.3, 58.2, 45.3, 45.1, 30.2, 22.4, 18.5. HR-MS (ESI)  $m/z$  calcd for  $C_{28}H_{29}N_4O_3$   $[M+H]^+$  469.2234, found 469.2234. IR (KBr): 2990, 2952, 2869, 1753, 1698, 1448, 1244, 1159, 1068, 920, 734, 673  $cm^{-1}$ .

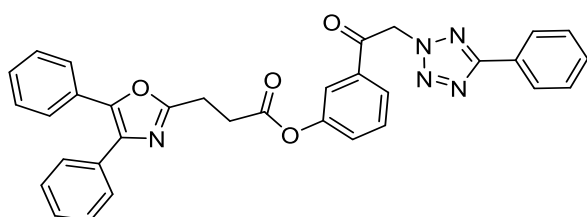

**3-[2-(5-Phenyl-2H-tetrazol-2-yl)acetyl]phenyl-3-(4,5-diphenyloxazol-2-yl)propanoate (3qa):** The general procedure was followed using substrate 3-acetylphenyl 3-(4,5-diphenyloxazol-2-yl)propanoate **1a** (0.4 mmol, 160 mg) and 5-phenyltetrazole **2a** (1.2 mmol, 175 mg). Isolation by column chromatography (PE/EtOAc: 7/1  $\rightarrow$  5/1) yielded **3qa** (111 mg, 49%) as a white solid. m.p: 108.6-110.0°C.  $R_f$  = 0.30 (3:1 petroleum ether: ethyl acetate).  $^1H$  NMR (400 MHz,  $CDCl_3$ )  $\delta$  8.17 (d,  $J$  = 4.9 Hz, 2H), 7.87 (d,  $J$  = 7.6 Hz, 1H), 7.72 – 7.62 (m, 3H), 7.61 – 7.39 (m, 8H), 7.34 (q,  $J$  = 7.1 Hz, 5H), 5.85 (s, 2H), 3.34 (t,  $J$  = 6.8 Hz, 2H), 3.20 (t,  $J$  = 6.7 Hz, 2H).  $^{13}C$  NMR (100 MHz,  $CDCl_3$ )  $\delta$  188.1, 170.5, 165.6, 161.3, 151.2, 145.8, 135.1, 135.1, 132.3, 130.5, 130.4, 128.9, 128.8, 128.7, 128.7, 128.3, 128.0, 127.9, 127.2, 127.0, 126.5, 125.8, 125.6, 121.5, 57.9, 31.2, 23.6. HR-MS (ESI)  $m/z$  calcd for  $C_{33}H_{26}N_5O_4$   $[M+H]^+$  556.1979, found 556.1980. IR (KBr): 3056, 2992, 1764, 1698, 1606, 1447, 1346, 1136, 1028, 957, 732, 691  $cm^{-1}$ .

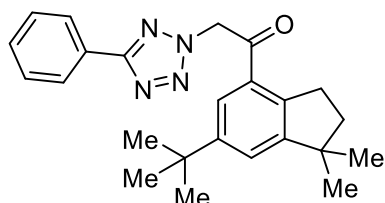

**1-[6-(tert-Butyl)-1,1-dimethyl-2,3-dihydro-1H-inden-4-yl]-2-(5-phenyl-2H-tetrazol-2-yl)ethan-1-one (3ra):** The general procedure was followed using substrate 1-(6-(tert-butyl)-1,1-dimethyl-2,3-dihydro-1H-inden-4-yl)ethan-1-one **1a** (1.5 mmol,

366 mg) and 5-phenyltetrazole **2a** (0.50 mmol, 73 mg). Isolation by column chromatography (PE/EtOAc: 12/1→8/1) yielded **3ra** (93 mg, 48%) as a white solid. m.p: 160.4-162.6°C.  $R_f = 0.33$  (4:1 petroleum ether: ethyl acetate).  $^1\text{H NMR}$  (400 MHz,  $\text{CDCl}_3$ )  $\delta$  8.18 (dd,  $J = 7.4, 2.2$  Hz, 2H), 7.72 (d,  $J = 1.5$  Hz, 1H), 7.53 – 7.46 (m, 3H), 7.44 (d,  $J = 1.4$  Hz, 1H), 6.12 (s, 2H), 3.18 (t,  $J = 7.3$  Hz, 2H), 1.96 (t,  $J = 7.3$  Hz, 2H), 1.39 (s, 9H), 1.27 (s, 6H).  $^{13}\text{C NMR}$  (100 MHz,  $\text{CDCl}_3$ )  $\delta$  190.2, 165.6, 155.3, 150.6, 142.6, 130.3, 129.9, 128.9, 127.3, 127.0, 125.0, 123.5, 59.2, 43.6, 41.3, 34.9, 31.5, 30.8, 28.7. HR-MS (ESI)  $m/z$  calcd for  $\text{C}_{24}\text{H}_{29}\text{N}_4\text{O}$   $[\text{M}+\text{H}]^+$  389.2336, found 389.2333. IR (KBr): 3062, 2955, 2864, 1578, 1464, 1346, 1220, 1046, 834, 731, 669  $\text{cm}^{-1}$ .

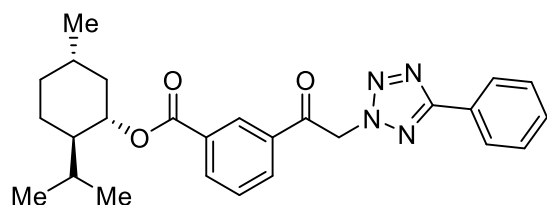

**(1S,2R,5S)-2-Isopropyl-5-methylcyclohexyl-3-[2-(5-phenyl-2H-tetrazol-2-yl)acetyl]benzoate (3sa):** The general procedure was followed using substrate (1S,2R,5S)-2-isopropyl-5-methylcyclohexyl 3-acetylbenzoate **1a** (0.50 mmol, 150 mg) and 5-phenyltetrazole **2a** (1.5 mmol, 220 mg). Isolation by column chromatography (PE/EtOAc: 12/1 → 8/1) yielded **3sa** (115 mg, 51%) as a white solid. m.p: 110.1-111.8°C.  $R_f = 0.33$  (4:1 petroleum ether: ethyl acetate).  $^1\text{H NMR}$  (400 MHz,  $\text{CDCl}_3$ )  $\delta$  8.63 (s, 1H), 8.35 (d,  $J = 7.8$  Hz, 1H), 8.24 – 8.14 (m, 3H), 7.66 (dd,  $J = 7.8, 7.8$  Hz, 1H), 7.49 (dd,  $J = 5.3, 1.7$  Hz, 3H), 6.19 (s, 2H), 5.00 (td,  $J = 10.9, 4.4$  Hz, 1H), 2.13 (d,  $J = 12.0$  Hz, 1H), 1.97 – 1.90 (m, 1H), 1.79 – 1.69 (m, 2H), 1.42 (s, 2H), 1.15 (q,  $J = 11.7$  Hz, 2H), 0.96 – 0.92 (m, 6H), 0.87 (dd,  $J = 6.4, 4.8$  Hz, 1H), 0.81 (d,  $J = 7.0$  Hz, 3H).  $^{13}\text{C NMR}$  (100 MHz,  $\text{CDCl}_3$ )  $\delta$  188.5, 165.7, 164.8, 135.4, 134.0, 132.1, 132.0, 130.5, 129.5, 129.1, 128.9, 127.2, 127.0, 75.8, 58.2, 47.2, 40.9, 34.2, 31.5, 26.6, 23.6, 22.0, 20.8, 16.6. HR-MS (ESI)  $m/z$  calcd for  $\text{C}_{26}\text{H}_{31}\text{N}_4\text{O}_3$   $[\text{M}+\text{H}]^+$  447.2391, found 447.2391. IR (KBr): 3069, 2957, 2871, 1718, 1604, 1451, 1346, 1213, 1122, 960, 738, 696, 641  $\text{cm}^{-1}$ .

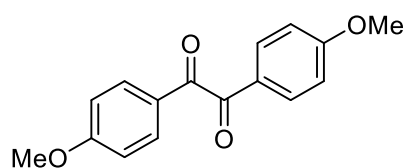

**1,2-Bis(4-methoxyphenyl)ethane-1,2-dione (3ta):** The general procedure was followed using substrate 1,2-bis(4-methoxyphenyl)ethan-1-one **1a** (1.2 mmol, 308 mg) and 5-phenyltetrazole **2a** (0.4 mmol, 58 mg). Isolation by column chromatography (PE/EtOAc: 10/1→7/1) yielded **3ta** (101 mg, 31%) as a yellow solid.  $R_f = 0.33$  (4:1 petroleum ether: ethyl acetate).  $^1\text{H NMR}$  (400 MHz,  $\text{CDCl}_3$ )  $\delta$  7.97 – 7.90 (m, 4H), 6.99 – 6.93 (m, 4H), 3.87 (s, 6H).  $^{13}\text{C NMR}$  (100 MHz,  $\text{CDCl}_3$ )  $\delta$  193.5, 164.9, 132.4, 126.3, 114.3, 55.6. Analytical data for compound **3ta** is consistent with literature report.<sup>[5]</sup>

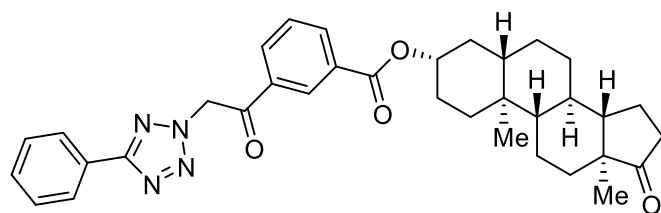

**(3S,5S,8R,9S,10S,13S,14S)-10,13-Dimethyl-17-oxohexadecahydro-1H-cyclopenta[a]phenanthren-3-yl-3-[2-(5-phenyl-2H-tetrazol-2-yl)acetyl]benzoate (3ua):** The general procedure was followed using substrate (3S,5S,9S,10S,13S,14S)-10,13-dimethyl-17-oxohexadecahydro-1H-cyclopenta[a]phenanthren-3-yl-3-acetylbenzoate **1a** (1.0 mmol, 400 mg) and 5-phenyltetrazole **2a** (0.50 mmol, 73 mg). Isolation by column chromatography (PE/EtOAc: 8/1→5/1) yielded **3ua** (44 mg, 20%) as a white solid. m.p: 196.4-198.5°C.  $R_f = 0.31$  (4:1 petroleum ether: ethyl acetate).  $^1\text{H NMR}$  (400 MHz,  $\text{CDCl}_3$ )  $\delta$  8.62 (s, 1H), 8.34 (d,  $J = 7.5$  Hz, 1H), 8.18 (dd,  $J = 6.7, 6.7$  Hz, 3H), 7.65 (dd,  $J = 7.7, 7.7$  Hz, 1H), 7.49 (s, 3H), 6.19 (s, 2H), 5.00 (m, 1H), 2.44 (dd,  $J = 19.2, 8.8$  Hz, 1H), 2.14 – 2.03 (m, 1H), 2.02 – 1.89 (m, 2H), 1.80 (t,  $J = 13.4$  Hz, 4H), 1.69 (d,  $J = 12.9$  Hz, 2H), 1.52 – 1.47 (m, 1H), 1.31 (dd,  $J = 30.9, 18.0$  Hz, 8H), 1.17 – 1.00 (m, 2H), 0.92 (s, 3H), 0.87 (s, 3H), 0.76 (t,  $J = 11.1$  Hz, 1H).  $^{13}\text{C NMR}$  (100 MHz,  $\text{CDCl}_3$ )  $\delta$  188.5, 165.7, 164.7, 135.4, 134.0, 132.1, 132.0, 130.5, 129.5,

129.1, 128.91, 127.2, 127.0, 75.1, 58.3, 54.3, 51.4, 47.8, 44.7, 36.7, 35.9, 35.7, 35.1, 34.0, 31.5, 30.8, 28.3, 27.5, 21.8, 20.5, 13.8, 12.3. HR-MS (ESI)  $m/z$  calcd for  $C_{35}H_{41}N_4O_4$   $[M+H]^+$  581.3122, found 581.3123. IR (KBr): 3069, 2939, 2844, 1737, 1713, 1604, 1449, 1287, 1216, 1129, 1008, 824, 734, 693  $cm^{-1}$ .

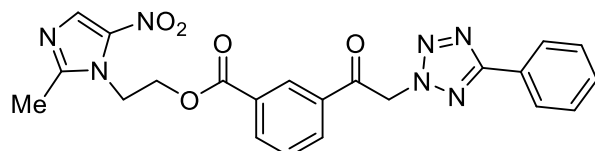

**2-(2-Methyl-5-nitro-1H-imidazol-1-yl)ethyl-3-[2-(5-phenyl-2H-tetrazol-2-yl)acetyl]benzoate (3va):** The general procedure was followed using substrate 2-(2-methyl-5-nitro-1H-imidazol-1-yl)ethyl 3-acetylbenzoate **1a** (0.4 mmol, 127 mg) and 5-phenyltetrazole **2a** (1.2 mmol, 175 mg). Isolation by column chromatography (PE/EtOAc: 4/1→1/1) yielded **3va** (55 mg, 30%) as a colorless oil.  $R_f$  = 0.30 (2:1 petroleum ether: ethyl acetate).  $^1H$  NMR (400 MHz,  $CDCl_3$ )  $\delta$  8.52 (s, 1H), 8.26 – 8.19 (m, 2H), 8.16 (dd,  $J$  = 6.5, 2.8 Hz, 2H), 7.97 (s, 1H), 7.66 (dd,  $J$  = 7.8, 7.8 Hz, 1H), 7.52 – 7.48 (m, 3H), 6.21 (s, 2H), 4.78 (t,  $J$  = 5.1 Hz, 2H), 4.71 (t,  $J$  = 5.0 Hz, 2H), 2.52 (s, 3H).  $^{13}C$  NMR (100 MHz,  $CDCl_3$ )  $\delta$  188.3, 165.7, 164.7, 150.6, 135.2, 134.3, 133.3, 132.9, 130.5, 130.2, 129.9, 129.0, 128.9, 127.1, 127.0, 63.5, 58.3, 44.9, 14.4. HR-MS (ESI)  $m/z$  calcd for  $C_{22}H_{19}N_7O_5Na$   $[M+Na]^+$  484.1340, found 484.1330. IR (KBr): 3134, 2996, 2952, 2855, 1716, 1601, 1536, 1472, 1362, 1211, 1100, 827, 729, 675  $cm^{-1}$ .

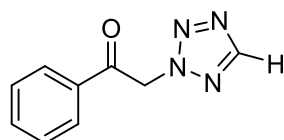

**1-Phenyl-2-(2H-tetrazol-2-yl)ethan-1-one (3ab):** The general procedure was followed using substrate acetophenone **1a** (1.5 mmol, 180 mg) and 2H-tetrazole **2a** (0.50 mmol, 35 mg). Isolation by column chromatography (PE/EtOAc: 15/1→10/1) yielded **3ab** (54 mg, 56%) as a white solid. m.p: 100.4-102.3°C.  $R_f$  = 0.33 (8:1 petroleum ether: ethyl acetate).  $^1H$  NMR (400 MHz,  $CDCl_3$ )  $\delta$  8.63 (s, 1H), 7.99 (d,  $J$  = 7.9 Hz, 2H), 7.69 (dd,  $J$  = 7.4, 7.4 Hz, 1H), 7.56 (dd,  $J$  = 7.7, 7.7 Hz, 2H), 6.15 (s,

2H).  $^{13}\text{C}$  NMR (100 MHz,  $\text{CDCl}_3$ )  $\delta$  188.8, 153.4, 134.8, 133.7, 129.2, 128.1, 58.1. HR-MS (ESI)  $m/z$  calcd for  $\text{C}_9\text{H}_9\text{N}_4\text{O}$   $[\text{M}+\text{H}]^+$  189.0771, found 189.0768. IR (KBr): 3062, 2967, 1709, 1599, 1455, 1342, 1231, 1129, 1034, 869, 756, 686  $\text{cm}^{-1}$ .

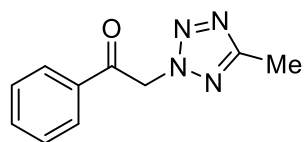

**2-(5-Methyl-2H-tetrazol-2-yl)-1-phenylethan-1-one (3ac):** The general procedure was followed using substrate acetophenone **1a** (1.5 mmol, 180 mg) and 5-methyl-2H-tetrazole **2a** (0.8 mmol, 67 mg). Isolation by column chromatography (PE/EtOAc: 14/1  $\rightarrow$  10/1) yielded **3ac** (117 mg, 71%) as a white solid. m.p: 82.9-83.9  $^{\circ}\text{C}$ .  $R_f$  = 0.33 (8:1 petroleum ether: ethyl acetate).  $^1\text{H}$  NMR (400 MHz,  $\text{CDCl}_3$ )  $\delta$  7.98 (d,  $J$  = 7.7 Hz, 2H), 7.68 (dd,  $J$  = 7.4, 7.4 Hz, 1H), 7.54 (dd,  $J$  = 7.6, 7.6 Hz, 2H), 6.04 (s, 2H), 2.59 (s, 3H).  $^{13}\text{C}$  NMR (100 MHz,  $\text{CDCl}_3$ )  $\delta$  189.2, 163.5, 134.7, 133.8, 129.2, 128.1, 57.9, 11.0. HR-MS (ESI)  $m/z$  calcd for  $\text{C}_{10}\text{H}_{11}\text{N}_4\text{O}$   $[\text{M}+\text{H}]^+$  203.0927, found 203.0925. IR (KBr): 3062, 2992, 2945, 1700, 1594, 1450, 1348, 1231, 1138, 1034, 996, 757, 686  $\text{cm}^{-1}$ .

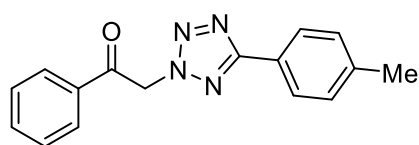

**1-Phenyl-2-(5-(p-tolyl)-2H-tetrazol-2-yl)ethan-1-one (3ad):** The general procedure was followed using substrate acetophenone **1a** (1.5 mmol, 180 mg) and 5-(p-tolyl)-2H-tetrazole **2a** (0.50 mmol, 80 mg). Isolation by column chromatography (PE/EtOAc: 20/1  $\rightarrow$  10/1) yielded **3ad** (57 mg, 41%) as a white solid. m.p: 139.8-141.7 $^{\circ}\text{C}$ .  $R_f$  = 0.30 (6:1 petroleum ether: ethyl acetate).  $^1\text{H}$  NMR (400 MHz,  $\text{CDCl}_3$ )  $\delta$  8.03 (dd,  $J$  = 20.2, 8.2 Hz, 4H), 7.69 (dd,  $J$  = 7.3, 7.3 Hz, 1H), 7.56 (m,  $J$  = 7.6, 7.6 Hz, 2H), 7.30 (d,  $J$  = 7.8 Hz, 2H), 6.13 (s, 2H), 2.42 (s, 3H).  $^{13}\text{C}$  NMR (100 MHz,  $\text{CDCl}_3$ )  $\delta$  189.0, 165.8, 140.6, 134.7, 133.9, 129.6, 129.2, 128.2, 126.9, 124.4,



58.1, 21.5. HR-MS (ESI)  $m/z$  calcd for  $C_{16}H_{15}N_4O$   $[M+H]^+$  279.1240, found 279.1230. IR (KBr): 2959, 1706, 1463, 1346, 1226, 1047, 834, 755, 683  $cm^{-1}$ .

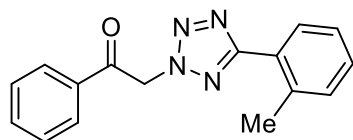

**1-Phenyl-2-(5-(*o*-tolyl)-2*H*-tetrazol-2-yl)ethan-1-one (3ae):** The general procedure was followed using substrate acetophenone **1a** (1.5 mmol, 180 mg) and 5-(*o*-tolyl)-2*H*-tetrazole **2a** (0.50 mmol, 80 mg). Isolation by column chromatography (PE/EtOAc: 30/1  $\rightarrow$  10/1) yielded **3ae** (125 mg, 90%) as a white solid. m.p: 107.9-109.6°C.  $R_f$  = 0.30 (6:1 petroleum ether: ethyl acetate).  $^1H$  NMR (400 MHz,  $CDCl_3$ )  $\delta$  8.09 – 7.97 (m, 3H), 7.68 (d,  $J$  = 4.0 Hz, 1H), 7.55 (d,  $J$  = 4.1 Hz, 2H), 7.34 (dd,  $J$  = 17.0, 6.5 Hz, 3H), 6.16 (s, 2H), 2.63 (s, 3H).  $^{13}C$  NMR (100 MHz,  $CDCl_3$ )  $\delta$  189.0, 166.0, 137.6, 134.7, 133.8, 131.3, 130.0, 129.6, 129.2, 128.2, 126.4, 126.0, 58.2, 21.7. HR-MS (ESI)  $m/z$  calcd for  $C_{16}H_{15}N_4O$   $[M+H]^+$  279.1240, found 279.1236. IR (KBr): 2986, 1706, 1581, 1477, 1448, 1339, 1225, 1035, 748, 682, 637  $cm^{-1}$ .

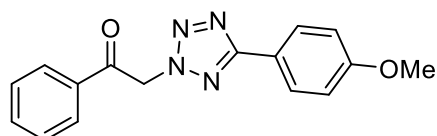

**2-(5-(4-Methoxyphenyl)-2*H*-tetrazol-2-yl)-1-phenylethan-1-one (3af):** The general procedure was followed using substrate acetophenone **1a** (1.5 mmol, 180 mg) and 5-(4-methoxyphenyl)-2*H*-tetrazole **2a** (0.50 mmol, 88 mg). Isolation by column chromatography (PE/EtOAc: 12/1  $\rightarrow$  8/1) yielded **3af** (141 mg, 95%) as a white solid. m.p: 155.3-156.5°C.  $R_f$  = 0.30 (6:1 petroleum ether: ethyl acetate).  $^1H$  NMR (400 MHz,  $CDCl_3$ )  $\delta$  8.10 (d,  $J$  = 8.9 Hz, 2H), 8.01 (d,  $J$  = 8.5 Hz, 2H), 7.69 (dd,  $J$  = 7.4, 7.4 Hz, 1H), 7.56 (dd,  $J$  = 7.7, 7.7 Hz, 2H), 7.01 (d,  $J$  = 8.9 Hz, 2H), 6.12 (s, 2H), 3.87 (s, 3H).  $^{13}C$  NMR (100 MHz,  $CDCl_3$ )  $\delta$  189.0, 165.6, 161.3, 134.7, 133.9, 129.2, 128.5, 128.2, 119.8, 114.3, 58.1, 55.4. HR-MS (ESI)  $m/z$  calcd for  $C_{16}H_{15}N_4O_2$

$[M+H]^+$  295.1190, found 295.1184. IR (KBr): 3019, 2942, 2841, 1702, 1613, 1458, 1342, 1256, 1027, 837, 763, 684  $\text{cm}^{-1}$ .

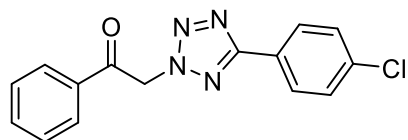

**2-[5-(4-Chlorophenyl)-2H-tetrazol-2-yl]-1-phenylethan-1-one (3ag):** The general procedure was followed using substrate acetophenone **1a** (1.5 mmol, 180 mg) and 5-(4-chlorophenyl)-2H-tetrazole **2a** (0.50 mmol, 90 mg). Isolation by column chromatography (PE/EtOAc: 14/1  $\rightarrow$  10/1) yielded **3ag** (98 mg, 66%) as a white solid. m.p: 151.9-153.6°C.  $R_f = 0.30$  (6:1 petroleum ether: ethyl acetate).  $^1\text{H}$  NMR (400 MHz,  $\text{CDCl}_3$ )  $\delta$  8.14 – 8.07 (m, 2H), 8.01 (d,  $J = 7.1$  Hz, 2H), 7.69 (d,  $J = 7.4$  Hz, 1H), 7.58 (d,  $J = 7.9$  Hz, 2H), 7.51 – 7.43 (m, 2H), 6.14 (s, 2H).  $^{13}\text{C}$  NMR (100 MHz,  $\text{CDCl}_3$ )  $\delta$  188.8, 164.8, 136.5, 134.8, 133.7, 129.3, 129.2, 128.3, 128.2, 125.8, 58.2. HR-MS (ESI)  $m/z$  calcd for  $\text{C}_{15}\text{H}_{12}\text{ClN}_4\text{O}$   $[M+H]^+$  299.0694, found 299.0691. IR (KBr): 3079, 2948, 2848, 1696, 1597, 1452, 1337, 1227, 1087, 849, 755, 685  $\text{cm}^{-1}$ .

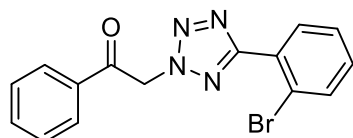

**2-(5-(2-Bromophenyl)-2H-tetrazol-2-yl)-1-phenylethan-1-one (3ah):** The general procedure was followed using substrate acetophenone **1a** (1.5 mmol, 180 mg) and 5-(2-bromophenyl)-2H-tetrazole **2a** (0.50 mmol, 112 mg). Isolation by column chromatography (PE/EtOAc: 15/1  $\rightarrow$  10/1) yielded **3ah** (106 mg, 62%) as a white solid. m.p: 118.3-120.1°C.  $R_f = 0.30$  (6:1 petroleum ether: ethyl acetate).  $^1\text{H}$  NMR (400 MHz,  $\text{CDCl}_3$ )  $\delta$  8.04 – 7.97 (m, 2H), 7.92 (d,  $J = 7.7$  Hz, 1H), 7.74 (d,  $J = 8.0$  Hz, 1H), 7.69 (dd,  $J = 7.2, 7.2$  Hz, 1H), 7.56 (dd,  $J = 7.5, 7.5$  Hz, 2H), 7.45 (dd,  $J = 7.5, 7.5$  Hz, 1H), 7.34 (dd,  $J = 7.7, 7.7$  Hz, 1H), 6.20 (s, 2H).  $^{13}\text{C}$  NMR (100 MHz,  $\text{CDCl}_3$ )  $\delta$  188.8, 164.6, 134.7, 134.1, 133.8, 131.9, 131.4, 129.2, 128.4, 128.2, 127.5, 122.2,

58.4. HR-MS (ESI)  $m/z$  calcd for  $C_{15}H_{12}BrN_4O$   $[M+H]^+$  343.0189, found 343.0185. IR (KBr): 3088, 2994, 2946, 1701, 1588, 1463, 1451, 1411, 1265, 998, 815, 716  $cm^{-1}$ .

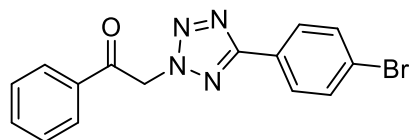

**2-[5-(4-Bromophenyl)-2H-tetrazol-2-yl]-1-phenylethan-1-one (3ai):** The general procedure was followed using substrate acetophenone **1a** (1.5 mmol, 180 mg) and 5-(4-bromophenyl)-2H-tetrazole **2a** (0.50 mmol, 112 mg). Isolation by column chromatography (PE/EtOAc: 15/1  $\rightarrow$  10/1) yielded **3ai** (118 mg, 69%) as a white solid. m.p: 162.4-164.4°C.  $R_f$  = 0.30 (6:1 petroleum ether: ethyl acetate).  $^1H$  NMR (400 MHz,  $CDCl_3$ )  $\delta$  8.02 (dd,  $J$  = 14.9, 8.1 Hz, 4H), 7.69 (dd,  $J$  = 7.2, 7.2 Hz, 1H), 7.63 (d,  $J$  = 8.3 Hz, 2H), 7.56 (dd,  $J$  = 7.5, 7.5 Hz, 2H), 6.14 (s, 2H).  $^{13}C$  NMR (100 MHz,  $CDCl_3$ )  $\delta$  188.8, 164.9, 134.7, 133.8, 132.2, 129.2, 128.5, 128.2, 126.2, 124.8, 58.2. HR-MS (ESI)  $m/z$  calcd for  $C_{15}H_{12}BrN_4O$   $[M+H]^+$  343.0189, found 343.0186. IR (KBr): 3079, 2996, 1706, 1598, 1454, 1343, 1228, 1066, 758, 684  $cm^{-1}$ .

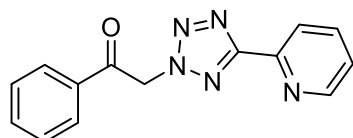

**1-Phenyl-2-(5-(pyridin-2-yl)-2H-tetrazol-2-yl)ethan-1-one (3aj):** The general procedure was followed using substrate acetophenone **1a** (1.5 mmol, 180 mg) and 2-(2H-tetrazol-5-yl)pyridine **2a** (0.50 mmol, 74 mg). Isolation by column chromatography (PE/EtOAc: 15/1  $\rightarrow$  8/1) yielded **3aj** (38 mg, 28%) as a yellow liquid.  $R_f$  = 0.33 (4:1 petroleum ether: ethyl acetate).  $^1H$  NMR (400 MHz,  $CDCl_3$ )  $\delta$  8.45 – 8.32 (m, 2H), 7.99 (d,  $J$  = 6.8 Hz, 2H), 7.85 (dd,  $J$  = 7.6, 7.6 Hz, 1H), 7.66 (d,  $J$  = 7.0 Hz, 1H), 7.55 (dd,  $J$  = 6.9, 6.9 Hz, 2H), 7.31 (s, 1H), 6.46 (s, 2H).  $^{13}C$  NMR (100 MHz,  $CDCl_3$ )  $\delta$  189.9, 152.4, 149.1, 144.5, 137.6, 134.3, 134.3, 129.1, 128.1, 125.4, 124.1, 55.7. HR-MS (ESI)  $m/z$  calcd for  $C_{14}H_{12}N_5O$   $[M+H]^+$  266.1036, found 266.1031.

### Gram-scale Synthesis and Control Experiments for the Mechanism Studies

(a) Gram-scale Synthesis

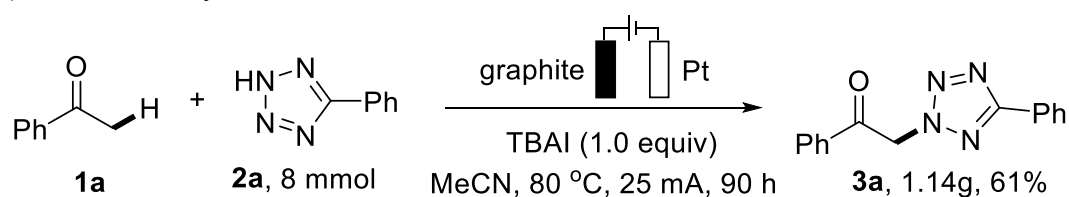

In an undivided cell (250 mL) equipped with a stirring bar, a mixture of substrates **1a** (24.0 mmol, 2.88 g), **2a** (8.0 mmol, 1.17 g), TBAI (8.0 mmol, 2.95 g) and MeCN (100 mL) were added. The cell was equipped with graphite (3 cm  $\times$  3 cm  $\times$  0.6 cm) as the anode and platinum plate (3 cm  $\times$  3 cm  $\times$  0.01 cm) as the cathode and connected to a DC regulated power supply. The reaction mixture was stirred and electrolyzed at a constant current of 25 mA at 80°C in oil bath for 90 h. Upon completion, the solvent was further removed directly under reduced pressure to afford the crude product, which was purified by flash column chromatography (PE/EtOAc: 25/1 $\rightarrow$ 15/1) yielded **3a** (1.14 g, 61%) as a white solid.

(b) Radical Scavenger Experiments with BHT

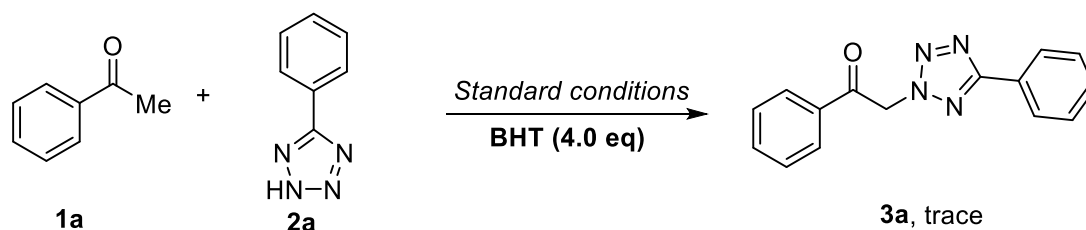

In an undivided cell (15 mL) equipped with a stirring bar, a mixture of substrates **1a** (1.5 mmol, 180 mg), BHT (2.0 mmol, 440 mg), **2a** (0.50 mmol, 73 mg), *n*-Bu<sub>4</sub>NI (0.50 mmol, 185 mg) and MeCN (8.0 mL) were added. The cell was equipped with graphite as the anode and platinum plate as the cathode connected to an AXIOMET AX-3003P DC regulated power supply. The reaction mixture was stirred and electrolyzed at a constant current of 13 mA at 80°C by heating mantle for 16 h. Upon completion, the reaction does not give the expected product.

(c) The reaction of **2aa** with **2a** without current

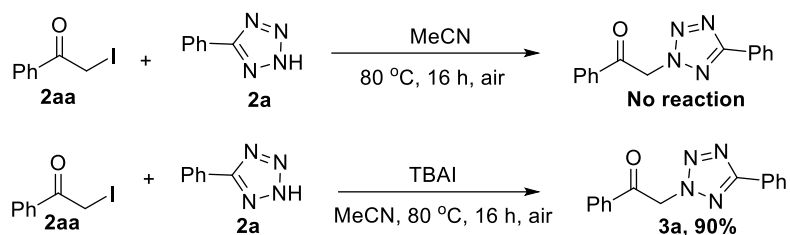

In a round bottom flask (25 mL) equipped with a stirring bar, a mixture of substrates **2aa** (1.0 mmol, 245 mg) and 5-phenyltetrazole **2a** (0.50 mmol, 73 mg), and MeCN (8 mL) were added. The reaction mixture was stirred and refluxed at 80°C by oil bath for 16 h without electricity under air. Upon completion, the reaction does not give the expected product.

Then, in a round bottom flask (25 mL) equipped with a stirring bar, a mixture of substrates **2aa** (1.0 mmol, 245 mg), **2a** (0.50 mmol, 73 mg), TBAI (0.50 mmol, 185 mg) and MeCN (8.0 mL) were added. The reaction mixture was stirred at 80°C time for 16 h under air. Upon completion, the solvent was removed directly under reduced pressure to afford the crude product, which was further purified by flash column chromatography on silica gel (PE/EtOAc: 20/1→10/1) to give a white solid **3a** (119 mg, 90%).

## Crystallographic description of **3a** and **3n**

### (i) Crystallographic description of 1-phenyl-2-(5-phenyl-2*H*-tetrazol-2-yl)ethan-1-one (**3a**).

The compound (**3a**) was crystallized from a supersaturated solution of dichloromethane by the slow evaporation method. Suitable single crystal was picked from the mother liquor and covered with perfluorinated polyether oil on a microscope slide. Compound **3a** was collected at 180.00 K on a Rigaku Oxford Diffraction Supernova Dual Source, Cu at Zero equipped with an AtlasS2 CCD using Cu K $\alpha$  radiation. Data reduction was carried out with the diffractometer's software<sup>[6]</sup>. The structure was solved by direct methods using Olex2 software<sup>[7]</sup>, and the non-hydrogen atoms were located from the trial structure and then refined anisotropically with SHELXL-2018<sup>[8]</sup> using a full-matrix least squares procedure based on  $F^2$ . The weighted  $R$  factor,  $wR$  and goodness-of-fit  $S$  values were obtained based on  $F^2$ . The

hydrogen atom positions were fixed geometrically at the calculated distances and allowed to ride on their parent atoms. Crystallographic data has been deposited with the Cambridge Crystallographic Centre and allocated with the deposition numbers: CCDC 2180990. Copies of the data can be obtained free of charge from The Cambridge Crystallographic Data Centre *via* [www.ccdc.cam.ac.uk/data\\_request/cif](http://www.ccdc.cam.ac.uk/data_request/cif).

### Crystal structure determination of 3a

Crystal Data for C<sub>15</sub>H<sub>12</sub>N<sub>4</sub>O (M = 264.29 g/mol): monoclinic, space group P21/c (no. 14), a = 12.6720(9) Å, b = 11.9871(7) Å, c = 9.0695(8) Å, β = 110.184(9)°, V = 1293.07(18) Å<sup>3</sup>, Z = 4, T = 180.00(10) K, μ(MoKα) = 0.090 mm<sup>-1</sup>, D<sub>calc</sub> = 1.358 g/cm<sup>3</sup>, 9622 reflections measured (4.824° ≤ 2θ ≤ 58.84°), 3185 unique (R<sub>int</sub> = 0.0275, R<sub>sigma</sub> = 0.0332) which were used in all calculations. The final R<sub>1</sub> was 0.0433 (I > 2σ(I)) and wR<sub>2</sub> was 0.1030 (all data).

**Table 1 Crystal data and structure refinement for 3a.**

|                                      |                                                  |
|--------------------------------------|--------------------------------------------------|
| Identification code                  | <b>3a</b>                                        |
| Empirical formula                    | C <sub>15</sub> H <sub>12</sub> N <sub>4</sub> O |
| Formula weight                       | 264.29                                           |
| Temperature/K                        | 180.00(10)                                       |
| Crystal system                       | monoclinic                                       |
| Space group                          | P21/c                                            |
| a/Å                                  | 12.6720(9)                                       |
| b/Å                                  | 11.9871(7)                                       |
| c/Å                                  | 9.0695(8)                                        |
| α/°                                  | 90                                               |
| β/°                                  | 110.184(9)                                       |
| γ/°                                  | 90                                               |
| Volume/Å <sup>3</sup>                | 1293.07(18)                                      |
| Z                                    | 4                                                |
| ρ <sub>calc</sub> /g/cm <sup>3</sup> | 1.358                                            |

|                                                |                                                             |
|------------------------------------------------|-------------------------------------------------------------|
| $\mu/\text{mm}^{-1}$                           | 0.090                                                       |
| F(000)                                         | 552.0                                                       |
| Crystal size/ $\text{mm}^3$                    | $0.15 \times 0.13 \times 0.12$                              |
| Radiation                                      | MoK $\alpha$ ( $\lambda = 0.71073$ )                        |
| 2 $\Theta$ range for data collection/ $^\circ$ | 4.824 to 58.84                                              |
| Index ranges                                   | $-16 \leq h \leq 17, -16 \leq k \leq 16, -8 \leq l \leq 11$ |
| Reflections collected                          | 9622                                                        |
| Independent reflections                        | 3185 [Rint = 0.0275, Rsigma = 0.0332]                       |
| Data/restraints/parameters                     | 3185/0/182                                                  |
| Goodness-of-fit on $F^2$                       | 1.031                                                       |
| Final R indexes [ $I \geq 2\sigma(I)$ ]        | $R_1 = 0.0433, wR_2 = 0.0925$                               |
| Final R indexes [all data]                     | $R_1 = 0.0608, wR_2 = 0.1030$                               |
| Largest diff. peak/hole / $e \text{ \AA}^{-3}$ | 0.20/-0.18                                                  |

**Table 2 Fractional Atomic Coordinates ( $\times 10^4$ ) and Equivalent Isotropic Displacement Parameters ( $\text{\AA}^2 \times 10^3$ ) for 3a.  $U_{eq}$  is defined as 1/3 of the trace of the orthogonalised UIJ tensor.**

| Atom | x          | y          | z          | U(eq)   |
|------|------------|------------|------------|---------|
| O1   | 3356.2(8)  | 514.5(9)   | 5004.4(12) | 42.0(3) |
| N1   | 648.5(9)   | 759.9(9)   | 3906.3(13) | 28.5(3) |
| C7   | 3193.9(10) | 255.3(11)  | 6200.6(16) | 28.5(3) |
| N2   | 1422.5(8)  | 1267.0(9)  | 5099.9(13) | 29.7(3) |
| C9   | -562.6(10) | 1463.0(11) | 1322.3(16) | 27.8(3) |
| C6   | 3980.1(10) | -465.6(10) | 7424.2(15) | 26.5(3) |
| C15  | 315.3(10)  | 1585.4(10) | 2868.5(16) | 27.2(3) |
| N3   | 1584.1(9)  | 2328.4(9)  | 4838.0(15) | 37.0(3) |
| C5   | 3756.9(10) | -817.3(11) | 8749.1(16) | 29.9(3) |
| N4   | 876.4(10)  | 2547.6(9)  | 3415.6(15) | 35.4(3) |
| C8   | 2132.9(11) | 673.0(11)  | 6469.6(16) | 31.2(3) |
| C1   | 4963.8(11) | -824.7(11) | 7197.2(17) | 32.5(3) |

|     |             |             |             |         |
|-----|-------------|-------------|-------------|---------|
| C10 | -916.3(10)  | 406.1(11)   | 710.0(17)   | 30.6(3) |
| C4  | 4486.0(11)  | -1537.3(12) | 9813.4(17)  | 35.2(3) |
| C2  | 5692.8(11)  | -1533.6(12) | 8273.6(18)  | 36.7(3) |
| C14 | -1047.6(11) | 2403.0(11)  | 442.1(17)   | 35.3(3) |
| C11 | -1730.4(11) | 291.6(13)   | -762.1(18)  | 37.8(3) |
| C3  | 5453.0(11)  | -1901.6(12) | 9567.1(18)  | 37.1(3) |
| C12 | -2201.9(12) | 1221.9(14)  | -1630.9(18) | 43.2(4) |
| C13 | -1857.6(13) | 2273.6(14)  | -1026.0(19) | 43.4(4) |

**Table 3 Anisotropic Displacement Parameters ( $\text{\AA}^2 \times 10^3$ ) for 3a. The Anisotropic displacement factor exponent takes the form:  $-2\pi^2[h^2a^2U_{11}+2hka^*b^*U_{12}+\dots]$ .**

| Atom | U11     | U22     | U33     | U23     | U13     | U12     |
|------|---------|---------|---------|---------|---------|---------|
| O1   | 42.2(6) | 53.0(6) | 38.3(6) | 11.8(5) | 23.4(5) | 8.6(5)  |
| N1   | 28.7(5) | 26.5(5) | 31.9(6) | 2.2(5)  | 12.7(5) | 0.7(4)  |
| C7   | 28.5(6) | 29.2(7) | 29.6(7) | -2.6(6) | 12.4(5) | -3.6(5) |
| N2   | 28.2(6) | 28.0(6) | 34.1(7) | 0.8(5)  | 12.5(5) | 1.0(4)  |
| C9   | 25.4(6) | 29.9(6) | 32.2(7) | 3.4(5)  | 15.3(5) | 2.3(5)  |
| C6   | 24.9(6) | 26.3(6) | 28.5(7) | -5.3(5) | 9.3(5)  | -2.8(5) |
| C15  | 27.0(6) | 23.1(6) | 35.8(8) | 2.4(5)  | 16.4(5) | 2.3(5)  |
| N3   | 35.3(6) | 29.0(6) | 44.3(8) | 1.7(5)  | 10.5(5) | -2.0(5) |
| C5   | 25.5(6) | 34.4(7) | 31.1(7) | -4.3(6) | 11.5(5) | -1.5(5) |
| N4   | 35.4(6) | 27.4(6) | 41.3(7) | 3.1(5)  | 10.4(5) | -2.4(5) |
| C8   | 31.0(7) | 34.4(7) | 29.3(7) | 3.7(6)  | 12.0(5) | 5.0(6)  |
| C1   | 30.4(6) | 36.7(7) | 33.3(8) | -4.2(6) | 14.7(6) | -0.3(6) |
| C10  | 28.1(6) | 30.2(7) | 38.9(8) | 2.4(6)  | 18.4(6) | 2.7(5)  |
| C4   | 35.4(7) | 40.4(8) | 28.7(8) | 1.0(6)  | 9.4(6)  | -1.1(6) |
| C2   | 27.7(7) | 40.8(8) | 41.6(9) | -6.4(7) | 11.8(6) | 5.1(6)  |
| C14  | 36.9(7) | 29.8(7) | 40.4(9) | 5.8(6)  | 14.9(6) | 3.5(6)  |
| C11  | 31.3(7) | 43.9(8) | 41.7(9) | -9.2(7) | 17.1(6) | -3.5(6) |
| C3   | 34.0(7) | 35.6(7) | 35.7(8) | -1.7(6) | 4.3(6)  | 4.5(6)  |



|     |         |          |         |         |         |         |
|-----|---------|----------|---------|---------|---------|---------|
| C12 | 31.8(7) | 61.9(10) | 34.8(9) | -1.8(7) | 10.3(6) | 3.5(7)  |
| C13 | 41.1(8) | 47.6(9)  | 40.7(9) | 12.8(7) | 13.1(7) | 11.7(7) |

**Table 4 Bond Lengths for 3a.**

| Atom | Atom | Length/Å   | Atom | Atom | Length/Å   |
|------|------|------------|------|------|------------|
| O1   | C7   | 1.2124(16) | C6   | C1   | 1.3997(18) |
| N1   | N2   | 1.3307(15) | C15  | N4   | 1.3559(16) |
| N1   | C15  | 1.3302(16) | N3   | N4   | 1.3188(16) |
| C7   | C6   | 1.4859(18) | C5   | C4   | 1.3838(19) |
| C7   | C8   | 1.5311(18) | C1   | C2   | 1.3806(19) |
| N2   | N3   | 1.3232(15) | C10  | C11  | 1.384(2)   |
| N2   | C8   | 1.4453(16) | C4   | C3   | 1.390(2)   |
| C9   | C15  | 1.4660(19) | C2   | C3   | 1.382(2)   |
| C9   | C10  | 1.3937(18) | C14  | C13  | 1.381(2)   |
| C9   | C14  | 1.3950(18) | C11  | C12  | 1.377(2)   |
| C6   | C5   | 1.3914(18) | C12  | C13  | 1.384(2)   |

**Table 5 Bond Angles for 3a.**

| Atom | Atom | Atom | Angle/°    | Atom | Atom | Atom | Angle/°    |
|------|------|------|------------|------|------|------|------------|
| C15  | N1   | N2   | 101.58(10) | N4   | C15  | C9   | 124.35(11) |
| O1   | C7   | C6   | 122.71(12) | N4   | N3   | N2   | 105.79(10) |
| O1   | C7   | C8   | 119.23(12) | C4   | C5   | C6   | 120.37(12) |
| C6   | C7   | C8   | 118.07(11) | N3   | N4   | C15  | 106.39(11) |
| N1   | N2   | C8   | 122.68(11) | N2   | C8   | C7   | 110.18(11) |
| N3   | N2   | N1   | 114.18(11) | C2   | C1   | C6   | 119.86(13) |
| N3   | N2   | C8   | 122.61(11) | C11  | C10  | C9   | 120.31(13) |
| C10  | C9   | C15  | 120.38(12) | C5   | C4   | C3   | 119.83(14) |
| C10  | C9   | C14  | 119.25(13) | C1   | C2   | C3   | 120.49(12) |
| C14  | C9   | C15  | 120.37(12) | C13  | C14  | C9   | 119.68(13) |
| C5   | C6   | C7   | 122.52(11) | C12  | C11  | C10  | 120.24(14) |

|    |     |    |            |     |     |     |            |
|----|-----|----|------------|-----|-----|-----|------------|
| C5 | C6  | C1 | 119.38(12) | C2  | C3  | C4  | 120.04(13) |
| C1 | C6  | C7 | 118.08(12) | C11 | C12 | C13 | 119.71(14) |
| N1 | C15 | C9 | 123.59(11) | C14 | C13 | C12 | 120.81(14) |
| N1 | C15 | N4 | 112.06(12) |     |     |     |            |

**Table 6 Torsion Angles for 3a.**

| <b>A</b> | <b>B</b> | <b>C</b> | <b>D</b> | <b>Angle/°</b> | <b>A</b> | <b>B</b> | <b>C</b> | <b>D</b> | <b>Angle/°</b> |
|----------|----------|----------|----------|----------------|----------|----------|----------|----------|----------------|
| O1       | C7       | C6       | C5       | -175.95(13)    | C15      | C9       | C10      | C11      | -178.81(12)    |
| O1       | C7       | C6       | C1       | 2.16(19)       | C15      | C9       | C14      | C13      | 178.69(12)     |
| O1       | C7       | C8       | N2       | 4.94(17)       | N3       | N2       | C8       | C7       | -82.82(15)     |
| N1       | N2       | N3       | N4       | 0.92(15)       | C5       | C6       | C1       | C2       | 0.89(19)       |
| N1       | N2       | C8       | C7       | 88.26(14)      | C5       | C4       | C3       | C2       | 0.9(2)         |
| N1       | C15      | N4       | N3       | -0.02(15)      | C8       | C7       | C6       | C5       | 3.46(18)       |
| C7       | C6       | C5       | C4       | 176.49(12)     | C8       | C7       | C6       | C1       | -178.43(11)    |
| C7       | C6       | C1       | C2       | -177.28(12)    | C8       | N2       | N3       | N4       | 172.70(11)     |
| N2       | N1       | C15      | C9       | -179.01(11)    | C1       | C6       | C5       | C4       | -1.59(19)      |
| N2       | N1       | C15      | N4       | 0.53(13)       | C1       | C2       | C3       | C4       | -1.6(2)        |
| N2       | N3       | N4       | C15      | -0.51(14)      | C10      | C9       | C15      | N1       | -15.01(19)     |
| C9       | C15      | N4       | N3       | 179.52(11)     | C10      | C9       | C15      | N4       | 165.51(12)     |
| C9       | C10      | C11      | C12      | -0.3(2)        | C10      | C9       | C14      | C13      | -0.8(2)        |
| C9       | C14      | C13      | C12      | 0.6(2)         | C10      | C11      | C12      | C13      | 0.0(2)         |
| C6       | C7       | C8       | N2       | -174.50(10)    | C14      | C9       | C15      | N1       | 165.48(12)     |
| C6       | C5       | C4       | C3       | 0.7(2)         | C14      | C9       | C15      | N4       | -14.0(2)       |
| C6       | C1       | C2       | C3       | 0.7(2)         | C14      | C9       | C10      | C11      | 0.71(19)       |
| C15      | N1       | N2       | N3       | -0.90(13)      | C11      | C12      | C13      | C14      | -0.2(2)        |
| C15      | N1       | N2       | C8       | -172.66(11)    |          |          |          |          |                |

**Table 7 Hydrogen Atom Coordinates ( $\text{\AA}\times 10^4$ ) and Isotropic Displacement Parameters ( $\text{\AA}^2\times 10^3$ ) for 3a.**

| <b>Atom</b> | <b>x</b> | <b>y</b> | <b>z</b> | <b>U(eq)</b> |
|-------------|----------|----------|----------|--------------|
|-------------|----------|----------|----------|--------------|

|     |          |          |          |    |
|-----|----------|----------|----------|----|
| H5  | 3114.14  | -567     | 8920.38  | 36 |
| H8A | 1724.2   | 44.76    | 6681.3   | 37 |
| H8B | 2341.33  | 1163.92  | 7375.17  | 37 |
| H1  | 5126.17  | -586.34  | 6323.15  | 39 |
| H10 | -603.65  | -225.2   | 1293.45  | 37 |
| H4  | 4329.28  | -1776.84 | 10691.28 | 42 |
| H2  | 6350.06  | -1765.11 | 8126.99  | 44 |
| H14 | -826.6   | 3113.3   | 842.03   | 42 |
| H11 | -1959.95 | -416.03  | -1166.05 | 45 |
| H3  | 5939.1   | -2393.46 | 10273.21 | 44 |
| H12 | -2749.18 | 1143.75  | -2619.71 | 52 |
| H13 | -2175.53 | 2900.91  | -1615.37 | 52 |

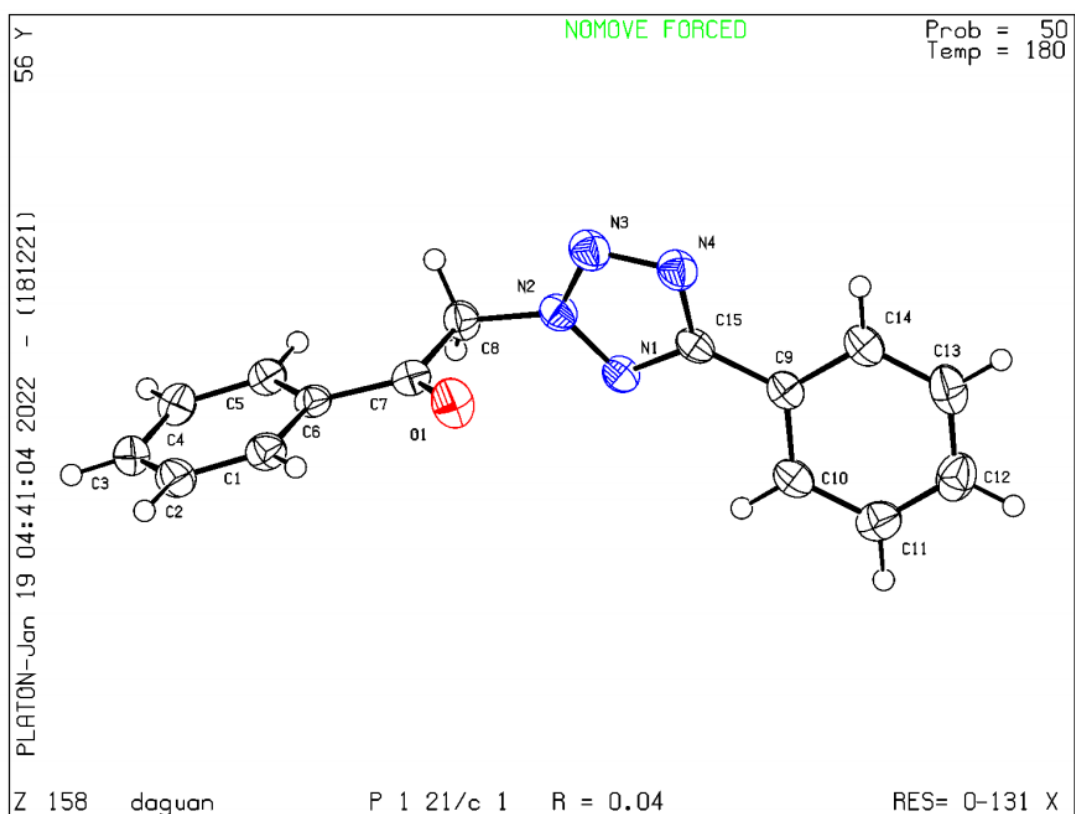

**Figure S2.** ORTEP view of 1-phenyl-2-(5-phenyl-2*H*-tetrazol-2-yl)ethan-1-one (**3a**) with ellipsoids at 50% probability.

**(ii) Crystallographic description of 1-([1,1'-biphenyl]-3-yl)-2-(5-phenyl-2*H*-tetrazol-2-yl)ethan-1-one(**3n**).**

The compound (**3n**) was crystallized from a supersaturated solution of dichloromethane by the slow evaporation method. Suitable single crystal was picked from the mother liquor and covered with perfluorinated polyether oil on a microscope slide. Compound **3n** was collected at 179.99 K on a Rigaku Oxford Diffraction Supernova Dual Source, Cu at Zero equipped with an AtlasS2 CCD using Cu K $\alpha$  radiation. Data reduction was carried out with the diffractometer's software<sup>[5]</sup>. The structure was solved by direct methods using Olex2 software<sup>[6]</sup>, and the non-hydrogen atoms were located from the trial structure and then refined anisotropically with SHELXL-2018<sup>[7]</sup> using a full-matrix least squares procedure based on  $F^2$ . The weighted  $R$  factor,  $wR$  and goodness-of-fit  $S$  values were obtained based on  $F^2$ . The hydrogen atom positions were fixed geometrically at the calculated distances and allowed to ride on their parent atoms. Crystallographic data has been deposited with the Cambridge Crystallographic Centre and allocated with the deposition numbers: CCDC 2180989. Copies of the data can be obtained free of charge from The Cambridge Crystallographic Data Centre *via* [www.ccdc.cam.ac.uk/data\\_request/cif](http://www.ccdc.cam.ac.uk/data_request/cif).

### Crystal structure determination of **3n**

Crystal Data for C<sub>21</sub>H<sub>16</sub>N<sub>4</sub>O (M = 340.38 g/mol): monoclinic, space group C2/c (no. 15),  $a = 32.257(5)$  Å,  $b = 6.2874(5)$  Å,  $c = 17.439(2)$  Å,  $\beta = 103.904(14)^\circ$ ,  $V = 3433.2(8)$  Å<sup>3</sup>,  $Z = 8$ ,  $T = 179.99(10)$  K,  $\mu(\text{CuK}\alpha) = 0.674$  mm<sup>-1</sup>,  $D_{\text{calc}} = 1.317$  g/cm<sup>3</sup>, 11406 reflections measured ( $5.644^\circ \leq 2\theta \leq 148.14^\circ$ ), 3400 unique ( $R_{\text{int}} = 0.0600$ ,  $R_{\text{sigma}} = 0.0622$ ) which were used in all calculations. The final  $R_1$  was 0.0555 ( $I > 2\sigma(I)$ ) and  $wR_2$  was 0.1543 (all data).

**Table 8 Crystal data and structure refinement for **3n**.**

|                     |                                                  |
|---------------------|--------------------------------------------------|
| Identification code | <b>3n</b>                                        |
| Empirical formula   | C <sub>21</sub> H <sub>16</sub> N <sub>4</sub> O |
| Formula weight      | 340.38                                           |
| Temperature/K       | 179.99(10)                                       |
| Crystal system      | monoclinic                                       |
| Space group         | C2/c                                             |
| $a/\text{Å}$        | 32.257(5)                                        |
| $b/\text{Å}$        | 6.2874(5)                                        |

|                                             |                                        |
|---------------------------------------------|----------------------------------------|
| c/Å                                         | 17.439(2)                              |
| $\alpha$ /°                                 | 90                                     |
| $\beta$ /°                                  | 103.904(14)                            |
| $\gamma$ /°                                 | 90                                     |
| Volume/Å <sup>3</sup>                       | 3433.2(8)                              |
| Z                                           | 8                                      |
| $\rho_{\text{calc}}$ /cm <sup>3</sup>       | 1.317                                  |
| $\mu$ /mm <sup>-1</sup>                     | 0.674                                  |
| F(000)                                      | 1424.0                                 |
| Crystal size/mm <sup>3</sup>                | 0.14 × 0.12 × 0.09                     |
| Radiation                                   | CuK $\alpha$ ( $\lambda$ = 1.54184)    |
| 2 $\Theta$ range for data collection/°      | 5.644 to 148.14                        |
| Index ranges                                | -39 ≤ h ≤ 39, -7 ≤ k ≤ 6, -20 ≤ l ≤ 21 |
| Reflections collected                       | 11406                                  |
| Independent reflections                     | 3400 [Rint = 0.0600, Rsigma = 0.0622]  |
| Data/restraints/parameters                  | 3400/0/236                             |
| Goodness-of-fit on F <sup>2</sup>           | 1.105                                  |
| Final R indexes [I ≥ 2 $\sigma$ (I)]        | R1 = 0.0555, wR2 = 0.1351              |
| Final R indexes [all data]                  | R1 = 0.0947, wR2 = 0.1543              |
| Largest diff. peak/hole / e Å <sup>-3</sup> | 0.32/-0.20                             |

**Table 9 Fractional Atomic Coordinates ( $\times 10^4$ ) and Equivalent Isotropic Displacement Parameters ( $\text{\AA}^2 \times 10^3$ ) for 3n. Ueq is defined as 1/3 of of the trace of the orthogonalised UIJ tensor.**

| Atom | x         | y        | z           | U(eq)   |
|------|-----------|----------|-------------|---------|
| O1   | 1066.8(6) | 1583(3)  | 298.7(11)   | 56.5(5) |
| N2   | 1795.5(6) | 2320(3)  | -128.5(11)  | 39.7(5) |
| N1   | 2095.4(6) | 2154(3)  | 538.8(11)   | 40.0(5) |
| C7   | 598.9(7)  | -4263(4) | -1459.7(13) | 40.9(6) |
| N4   | 1987.4(7) | 5495(3)  | 117.9(12)   | 48.2(5) |
| C12  | 899.1(7)  | -2729(3) | -1120.4(13) | 39.8(5) |
| C13  | 1129.7(7) | 383(4)   | -207.2(14)  | 40.3(5) |
| C21  | 2213.3(7) | 4180(3)  | 677.9(13)   | 37.0(5) |
| C19  | 3036.5(7) | 7585(4)  | 2006.7(15)  | 45.4(6) |
| C8   | 215.9(8)  | -4346(4) | -1223.7(14) | 46.9(6) |
| N3   | 1722.2(7) | 4287(3)  | -392.8(12)  | 49.9(5) |
| C20  | 2708.5(7) | 6959(4)  | 1379.1(14)  | 41.4(6) |
| C9   | 134.5(8)  | -2941(4) | -669.3(15)  | 52.0(7) |
| C6   | 680.5(8)  | -5725(4) | -2079.4(14) | 44.6(6) |
| C15  | 2554.8(7) | 4879(4)  | 1347.8(13)  | 38.3(5) |
| C10  | 430.2(8)  | -1415(4) | -341.7(15)  | 47.8(6) |
| C11  | 818.9(7)  | -1306(4) | -563.6(13)  | 39.5(5) |
| C16  | 2728.3(7) | 3476(4)  | 1957.4(15)  | 45.3(6) |
| C14  | 1537.4(7) | 545(4)   | -499.5(14)  | 42.1(6) |

|     |           |          |             |         |
|-----|-----------|----------|-------------|---------|
| C1  | 890.7(8)  | -5017(5) | -2636.7(15) | 51.6(7) |
| C17 | 3050.2(8) | 4147(4)  | 2583.5(15)  | 50.2(7) |
| C5  | 528.7(8)  | -7792(4) | -2128.0(16) | 52.5(7) |
| C18 | 3205.5(8) | 6200(4)  | 2607.4(15)  | 49.1(6) |
| C2  | 947.4(9)  | -6346(5) | -3237.1(17) | 63.3(8) |
| C4  | 589.9(10) | -9129(4) | -2725.7(18) | 63.5(8) |
| C3  | 798.6(10) | -8406(5) | -3274.5(19) | 67.6(9) |

**Table 10 Anisotropic Displacement Parameters ( $\text{\AA}^2 \times 10^3$ ) for 3n. The Anisotropic displacement factor exponent takes the form:  $-2\pi^2[h^2a^*2U_{11}+2hka^*b^*U_{12}+\dots]$ .**

| Atom | U11      | U22      | U33      | U23       | U13       | U12      |
|------|----------|----------|----------|-----------|-----------|----------|
| O1   | 56.8(11) | 56.4(11) | 62.0(12) | -19.0(9)  | 25.5(9)   | -11.7(9) |
| N2   | 37.8(11) | 35.9(11) | 44.6(11) | 0.8(9)    | 8.5(9)    | -1.4(8)  |
| N1   | 38.4(11) | 36.2(11) | 44.1(11) | 1.4(9)    | 7.4(8)    | -1.2(8)  |
| C7   | 37.9(13) | 40.8(13) | 40.2(13) | -0.2(10)  | 2.0(10)   | 1.6(10)  |
| N4   | 47.9(12) | 38.4(11) | 53.8(13) | 4.6(10)   | 3.4(10)   | -2.7(9)  |
| C12  | 35.0(12) | 40.8(13) | 42.6(13) | 0.3(10)   | 7.4(10)   | -0.7(10) |
| C13  | 40.1(13) | 40.0(13) | 40.7(13) | -1.2(10)  | 9.7(10)   | 0.1(10)  |
| C21  | 37.2(12) | 35.5(12) | 40.8(13) | 2.2(10)   | 14.4(10)  | 1.2(9)   |
| C19  | 39.0(13) | 37.3(13) | 60.2(16) | -5.9(11)  | 12.9(11)  | -3.2(10) |
| C8   | 37.7(13) | 51.7(15) | 48.2(14) | -2.8(12)  | 4.5(11)   | -6.5(11) |
| N3   | 51.6(13) | 38.8(12) | 53.8(13) | 6.0(10)   | 1.8(10)   | -3.2(9)  |
| C20  | 38.2(12) | 39.1(13) | 47.8(14) | -0.3(11)  | 11.8(10)  | -1.5(10) |
| C9   | 39.6(14) | 65.3(17) | 52.4(16) | -4.4(13)  | 13.5(11)  | -7.5(12) |
| C6   | 35.6(12) | 47.0(15) | 44.9(14) | -6.3(11)  | -3.1(10)  | 3.0(10)  |
| C15  | 34.9(12) | 37.7(12) | 44.3(13) | 0.3(10)   | 13.6(10)  | -0.2(9)  |
| C10  | 41.5(14) | 55.5(16) | 47.5(14) | -7.6(12)  | 12.9(11)  | -2.5(11) |
| C11  | 36.9(12) | 41.0(13) | 39.7(13) | -1.9(10)  | 7.4(10)   | -0.5(10) |
| C16  | 38.7(13) | 39.3(13) | 57.9(16) | 6.9(11)   | 11.3(12)  | -1.3(10) |
| C14  | 38.4(13) | 38.2(13) | 48.8(14) | -5.6(11)  | 8.6(10)   | -2.7(10) |
| C1   | 38.8(13) | 58.1(16) | 56.2(16) | -10.5(13) | 8.2(12)   | 4.8(12)  |
| C17  | 36.5(13) | 56.6(16) | 54.6(15) | 12.2(13)  | 5.4(11)   | -0.8(11) |
| C5   | 50.3(16) | 43.6(15) | 53.6(16) | -1.4(12)  | -7.3(12)  | 5.5(11)  |
| C18  | 36.1(13) | 57.4(16) | 52.0(15) | -3.5(12)  | 7.3(11)   | -1.3(11) |
| C2   | 48.3(16) | 78(2)    | 61.5(18) | -16.4(16) | 9.6(14)   | 12.6(14) |
| C4   | 61.9(19) | 47.1(16) | 67(2)    | -13.3(14) | -12.2(15) | 11.0(13) |
| C3   | 54.3(18) | 74(2)    | 64.3(19) | -24.7(16) | -5.5(15)  | 24.9(15) |

**Table 11 Bond Lengths for 3n.**

| Atom | Atom | Length/ $\text{\AA}$ | Atom | Atom | Length/ $\text{\AA}$ |
|------|------|----------------------|------|------|----------------------|
| O1   | C13  | 1.214(3)             | C19  | C18  | 1.370(3)             |
| N2   | N1   | 1.327(3)             | C8   | C9   | 1.381(3)             |
| N2   | N3   | 1.321(2)             | C20  | C15  | 1.395(3)             |
| N2   | C14  | 1.449(3)             | C9   | C10  | 1.376(3)             |

|     |     |          |     |     |          |
|-----|-----|----------|-----|-----|----------|
| N1  | C21 | 1.335(3) | C6  | C1  | 1.385(4) |
| C7  | C12 | 1.393(3) | C6  | C5  | 1.384(3) |
| C7  | C8  | 1.394(3) | C15 | C16 | 1.391(3) |
| C7  | C6  | 1.490(3) | C10 | C11 | 1.400(3) |
| N4  | C21 | 1.351(3) | C16 | C17 | 1.380(3) |
| N4  | N3  | 1.318(3) | C1  | C2  | 1.386(3) |
| C12 | C11 | 1.390(3) | C17 | C18 | 1.382(3) |
| C13 | C11 | 1.490(3) | C5  | C4  | 1.389(4) |
| C13 | C14 | 1.524(3) | C2  | C3  | 1.377(4) |
| C21 | C15 | 1.467(3) | C4  | C3  | 1.373(4) |
| C19 | C20 | 1.384(3) |     |     |          |

**Table 12 Bond Angles for 3n.**

| Atom | Atom | Atom | Angle/°    | Atom | Atom | Atom | Angle/°    |
|------|------|------|------------|------|------|------|------------|
| N1   | N2   | C14  | 123.44(18) | C1   | C6   | C7   | 120.8(2)   |
| N3   | N2   | N1   | 114.28(18) | C5   | C6   | C7   | 120.2(2)   |
| N3   | N2   | C14  | 122.00(19) | C5   | C6   | C1   | 119.0(2)   |
| N2   | N1   | C21  | 101.56(17) | C20  | C15  | C21  | 120.3(2)   |
| C12  | C7   | C6   | 120.6(2)   | C16  | C15  | C21  | 120.4(2)   |
| C8   | C7   | C12  | 118.4(2)   | C16  | C15  | C20  | 119.4(2)   |
| C8   | C7   | C6   | 121.0(2)   | C9   | C10  | C11  | 119.8(2)   |
| N3   | N4   | C21  | 106.60(18) | C12  | C11  | C13  | 122.1(2)   |
| C11  | C12  | C7   | 121.0(2)   | C12  | C11  | C10  | 119.4(2)   |
| O1   | C13  | C11  | 122.2(2)   | C10  | C11  | C13  | 118.5(2)   |
| O1   | C13  | C14  | 120.7(2)   | C17  | C16  | C15  | 119.9(2)   |
| C11  | C13  | C14  | 117.15(19) | N2   | C14  | C13  | 110.58(18) |
| N1   | C21  | N4   | 111.8(2)   | C6   | C1   | C2   | 120.8(3)   |
| N1   | C21  | C15  | 123.9(2)   | C16  | C17  | C18  | 120.5(2)   |
| N4   | C21  | C15  | 124.3(2)   | C6   | C5   | C4   | 120.1(3)   |
| C18  | C19  | C20  | 120.8(2)   | C19  | C18  | C17  | 119.7(2)   |
| C9   | C8   | C7   | 120.9(2)   | C3   | C2   | C1   | 119.7(3)   |
| N4   | N3   | N2   | 105.72(19) | C3   | C4   | C5   | 120.3(3)   |
| C19  | C20  | C15  | 119.6(2)   | C4   | C3   | C2   | 120.1(3)   |
| C10  | C9   | C8   | 120.5(2)   |      |      |      |            |

**Table 13 Torsion Angles for 3n.**

| A  | B   | C   | D   | Angle/°   | A   | B   | C   | D   | Angle/°  |
|----|-----|-----|-----|-----------|-----|-----|-----|-----|----------|
| O1 | C13 | C11 | C12 | -177.5(2) | C8  | C9  | C10 | C11 | -0.9(4)  |
| O1 | C13 | C11 | C10 | 4.2(4)    | N3  | N2  | N1  | C21 | -0.7(2)  |
| O1 | C13 | C14 | N2  | -3.3(3)   | N3  | N2  | C14 | C13 | -82.5(3) |
| N2 | N1  | C21 | N4  | 0.7(2)    | N3  | N4  | C21 | N1  | -0.5(3)  |
| N2 | N1  | C21 | C15 | -177.8(2) | N3  | N4  | C21 | C15 | 178.0(2) |
| N1 | N2  | N3  | N4  | 0.5(3)    | C20 | C19 | C18 | C17 | 0.7(4)   |
| N1 | N2  | C14 | C13 | 91.0(2)   | C20 | C15 | C16 | C17 | -0.2(3)  |

|     |     |     |     |           |     |     |     |     |            |
|-----|-----|-----|-----|-----------|-----|-----|-----|-----|------------|
| N1  | C21 | C15 | C20 | 169.0(2)  | C9  | C10 | C11 | C12 | 0.7(4)     |
| N1  | C21 | C15 | C16 | -11.0(3)  | C9  | C10 | C11 | C13 | 179.1(2)   |
| C7  | C12 | C11 | C13 | -178.4(2) | C6  | C7  | C12 | C11 | 177.6(2)   |
| C7  | C12 | C11 | C10 | -0.1(3)   | C6  | C7  | C8  | C9  | -177.7(2)  |
| C7  | C8  | C9  | C10 | 0.4(4)    | C6  | C1  | C2  | C3  | -0.9(4)    |
| C7  | C6  | C1  | C2  | -176.7(2) | C6  | C5  | C4  | C3  | -0.4(4)    |
| C7  | C6  | C5  | C4  | 177.4(2)  | C15 | C16 | C17 | C18 | -0.6(4)    |
| N4  | C21 | C15 | C20 | -9.4(3)   | C11 | C13 | C14 | N2  | 177.12(19) |
| N4  | C21 | C15 | C16 | 170.6(2)  | C16 | C17 | C18 | C19 | 0.4(4)     |
| C12 | C7  | C8  | C9  | 0.2(4)    | C14 | N2  | N1  | C21 | -174.7(2)  |
| C12 | C7  | C6  | C1  | -36.7(3)  | C14 | N2  | N3  | N4  | 174.5(2)   |
| C12 | C7  | C6  | C5  | 146.3(2)  | C14 | C13 | C11 | C12 | 2.1(3)     |
| C21 | N4  | N3  | N2  | 0.0(3)    | C14 | C13 | C11 | C10 | -176.3(2)  |
| C21 | C15 | C16 | C17 | 179.8(2)  | C1  | C6  | C5  | C4  | 0.4(3)     |
| C19 | C20 | C15 | C21 | -178.7(2) | C1  | C2  | C3  | C4  | 0.9(4)     |
| C19 | C20 | C15 | C16 | 1.3(3)    | C5  | C6  | C1  | C2  | 0.3(4)     |
| C8  | C7  | C12 | C11 | -0.4(3)   | C5  | C4  | C3  | C2  | -0.2(4)    |
| C8  | C7  | C6  | C1  | 141.2(2)  | C18 | C19 | C20 | C15 | -1.5(4)    |
| C8  | C7  | C6  | C5  | -35.8(3)  |     |     |     |     |            |

**Table 14 Hydrogen Atom Coordinates ( $\text{\AA}\times 10^4$ ) and Isotropic Displacement Parameters ( $\text{\AA}^2\times 10^3$ ) for 3n.**

| Atom | x       | y         | z        | U(eq) |
|------|---------|-----------|----------|-------|
| H12  | 1157.05 | -2657.42  | -1268.83 | 48    |
| H19  | 3143.43 | 8961.34   | 2021.05  | 54    |
| H8   | 12.38   | -5361.98  | -1442.73 | 56    |
| H20  | 2591.21 | 7919.48   | 980.4    | 50    |
| H9   | -122.02 | -3025.63  | -516.06  | 62    |
| H10  | 371.91  | -459.75   | 25.85    | 57    |
| H16  | 2627.36 | 2087.67   | 1942.92  | 54    |
| H14A | 1699.51 | -763.26   | -378.83  | 50    |
| H14B | 1464.82 | 732.91    | -1068.27 | 50    |
| H1   | 995     | -3632.87  | -2607.59 | 62    |
| H17  | 3163.65 | 3209.21   | 2992.64  | 60    |
| H5   | 385.48  | -8287.02  | -1759.93 | 63    |
| H18  | 3423.75 | 6640.12   | 3029.39  | 59    |
| H2   | 1085.31 | -5850.02  | -3613    | 76    |
| H4   | 489.12  | -10519.17 | -2754.13 | 76    |
| H3   | 839.5   | -9309.06  | -3672.25 | 81    |



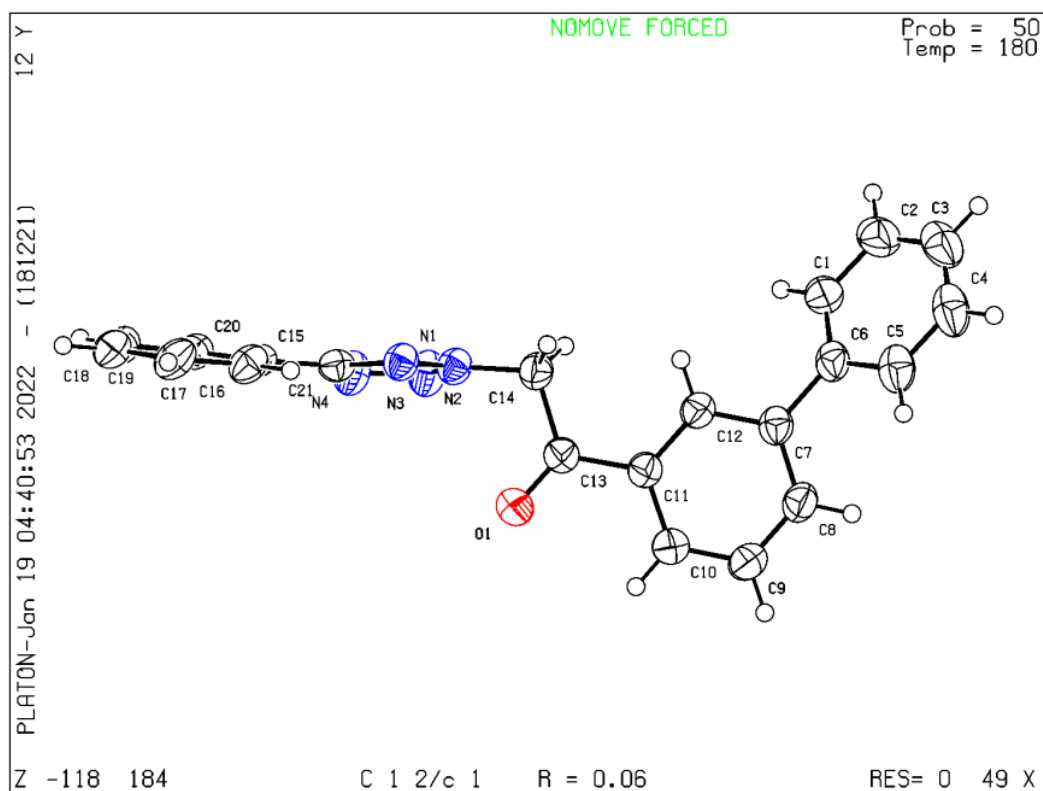

**Figure S3.** ORTEP view of 1-([1,1'-biphenyl]-3-yl)-2-(5-phenyl-2*H*-tetrazol-2-yl)ethan-1-one (**3n**) with ellipsoids at 50% probability.

## References

- [1] Umemoto, H.; Maegawa, T. *Synlett.*, **2015**, 26, 205–208.
- [2] Kanakaraju, S.; Suresh, L. *RSC Adv.*, **2015**, 5, 29325–29334.
- [3] Venkataramani, S.; Patel, B. K. *Chem. Sci.*, **2021**, 12, 15318–15328.
- [4] Gilbert, I. H.; Wyatt, P. G. *ChemMedChem.*, **2012**, 7, 95 – 106.
- [5] Shinichi K.; Higashikawa G. *RSC Adv.*, **2021**, 11, 32837–32840.
- [6] Dolomanov, O. V.; Bourhis, L. J. *J. Appl. Cryst.*, **2009**, 42, 339–341.
- [7] Bourhis, L.J.; Puschmann, H. *Acta Cryst.*, **2015**, A71, 59–75.
- [8] Sheldrick, G.M.; *Acta Cryst.*, **2015**, C71, 3–8.

# NMR Spectra

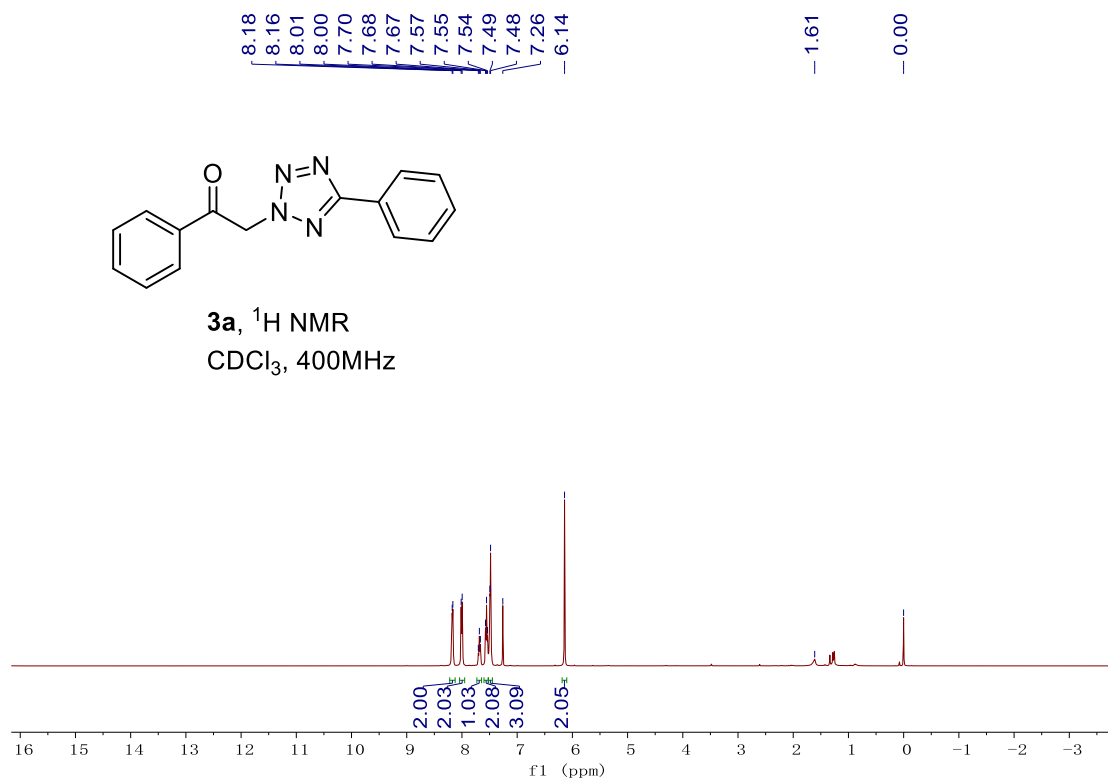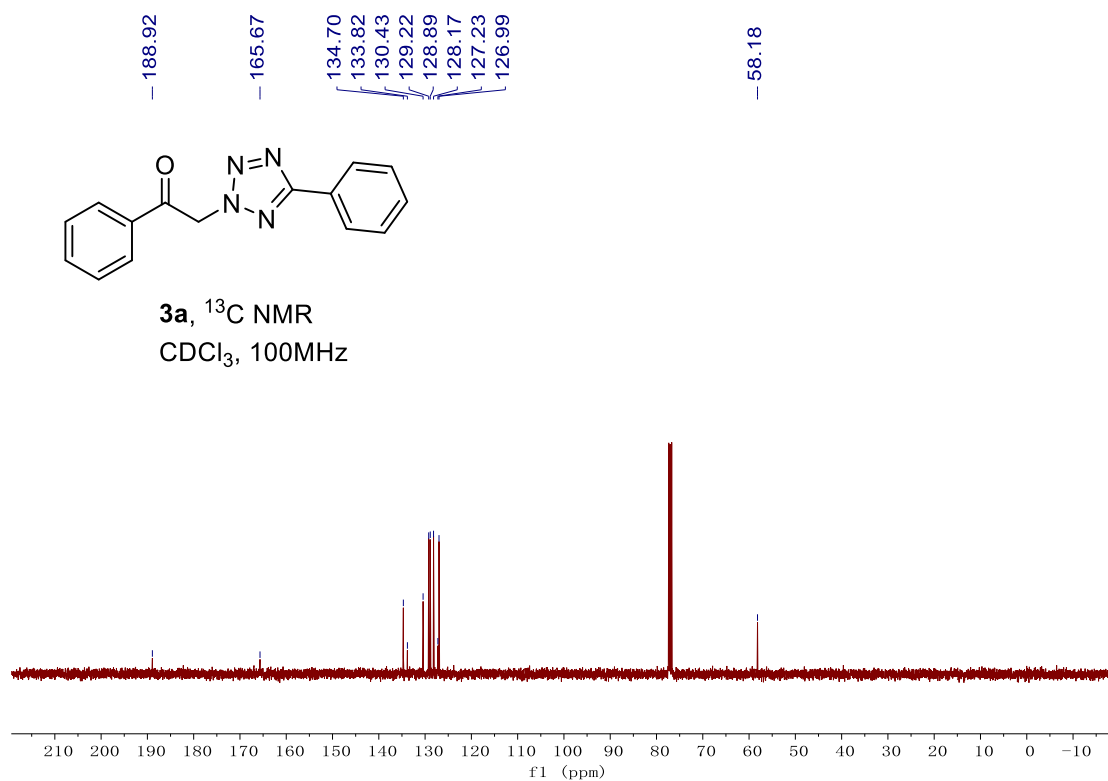

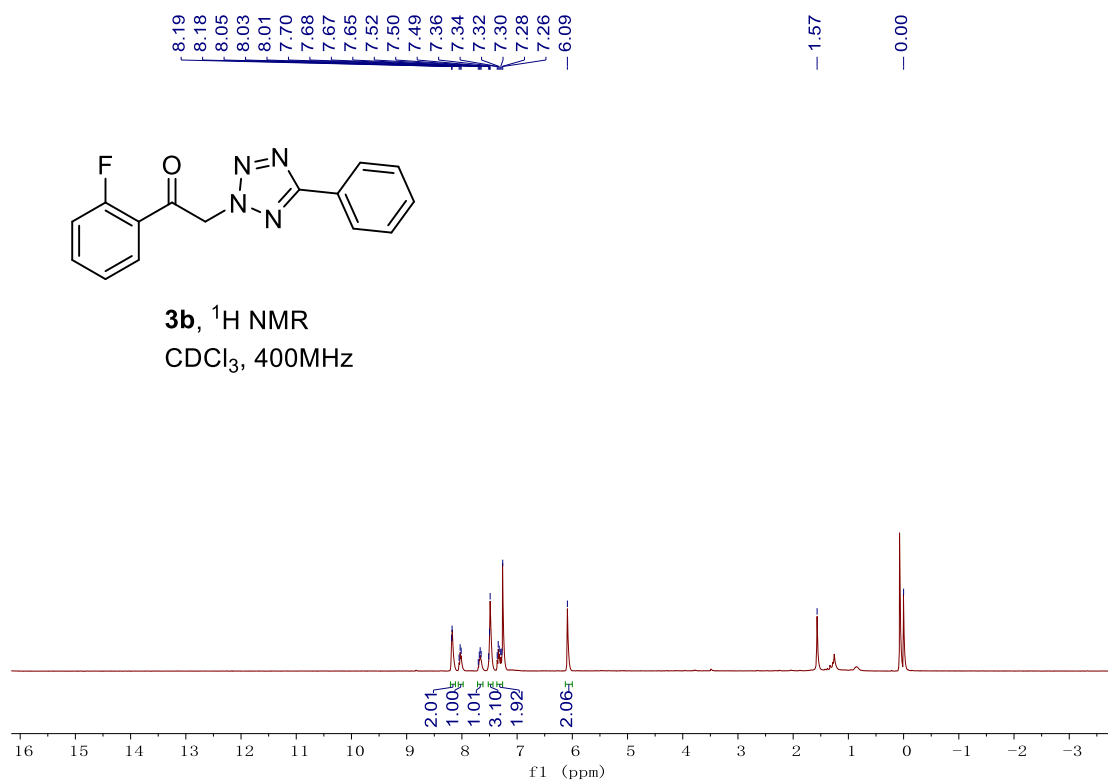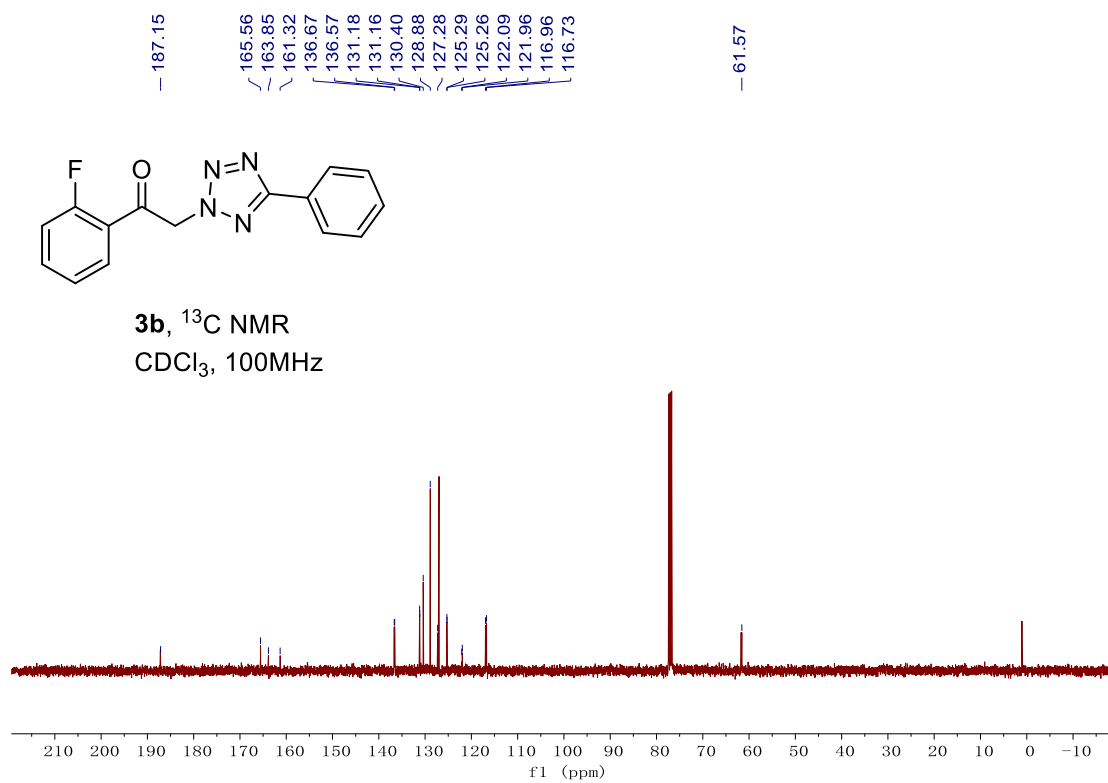

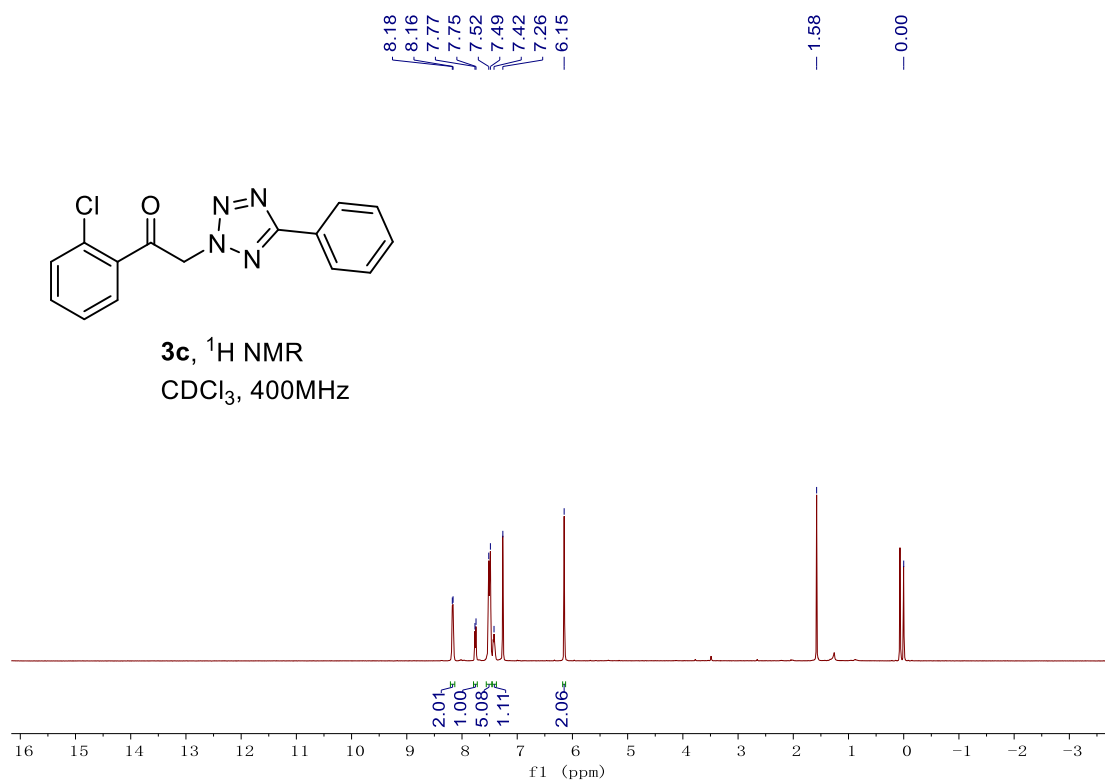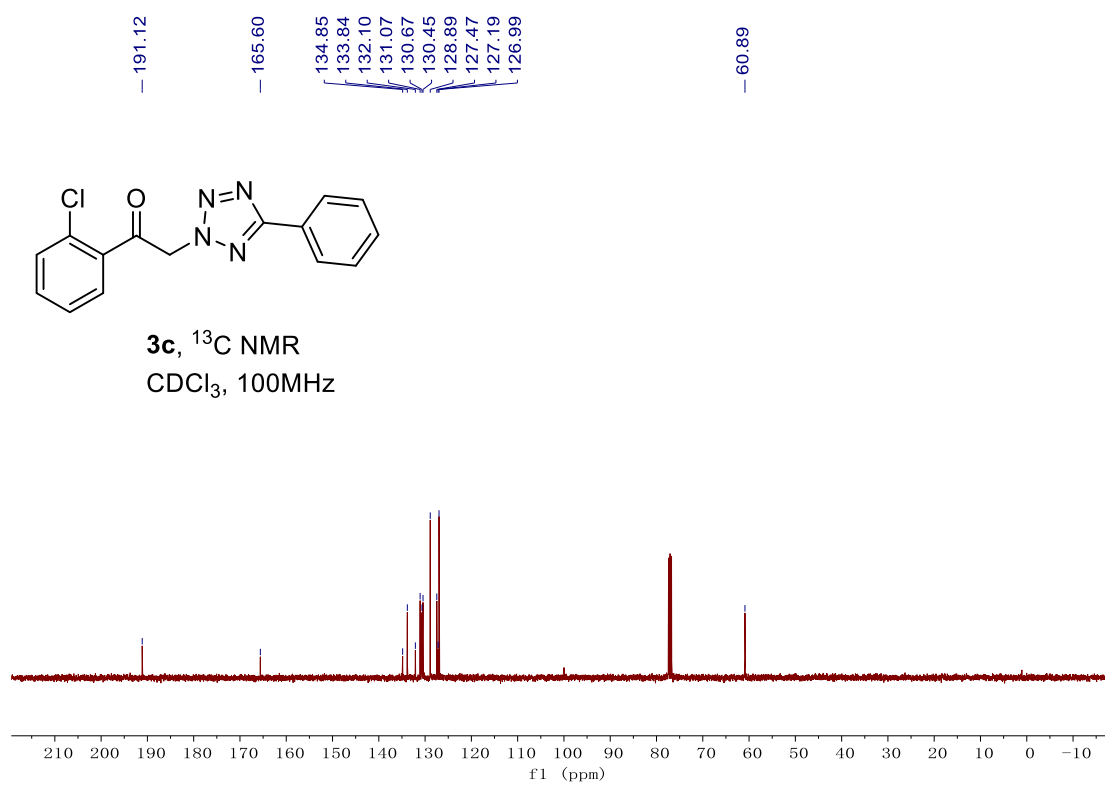

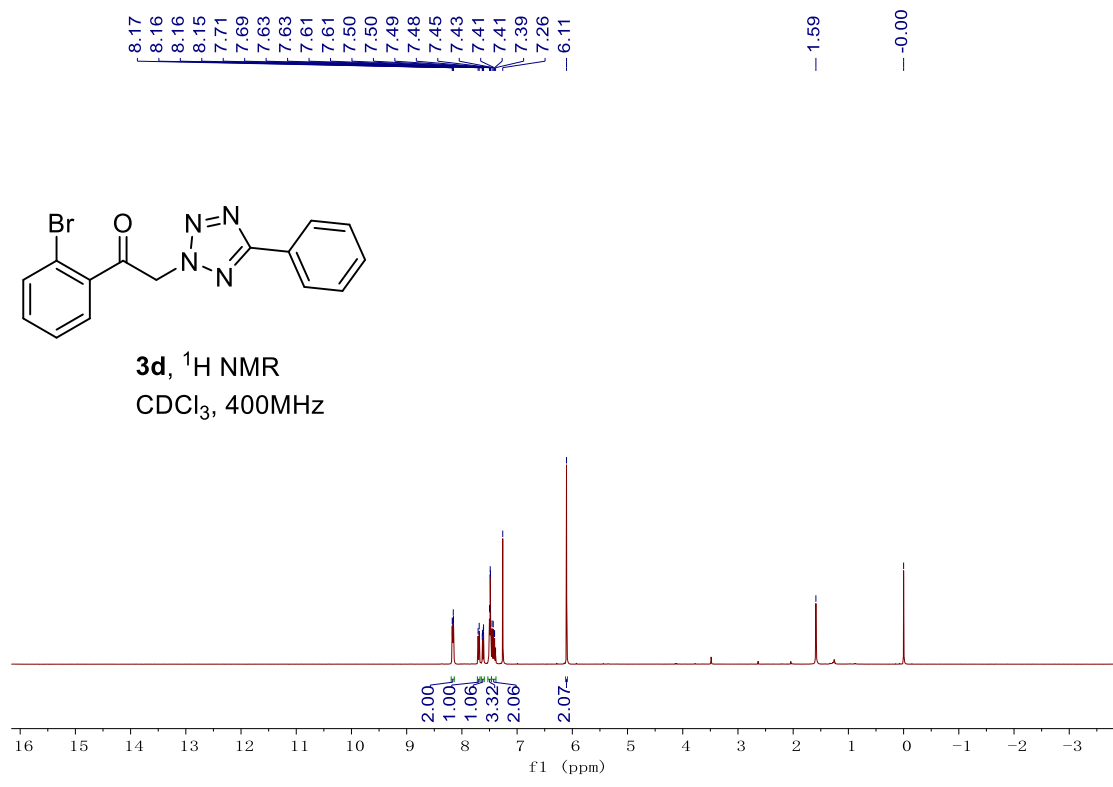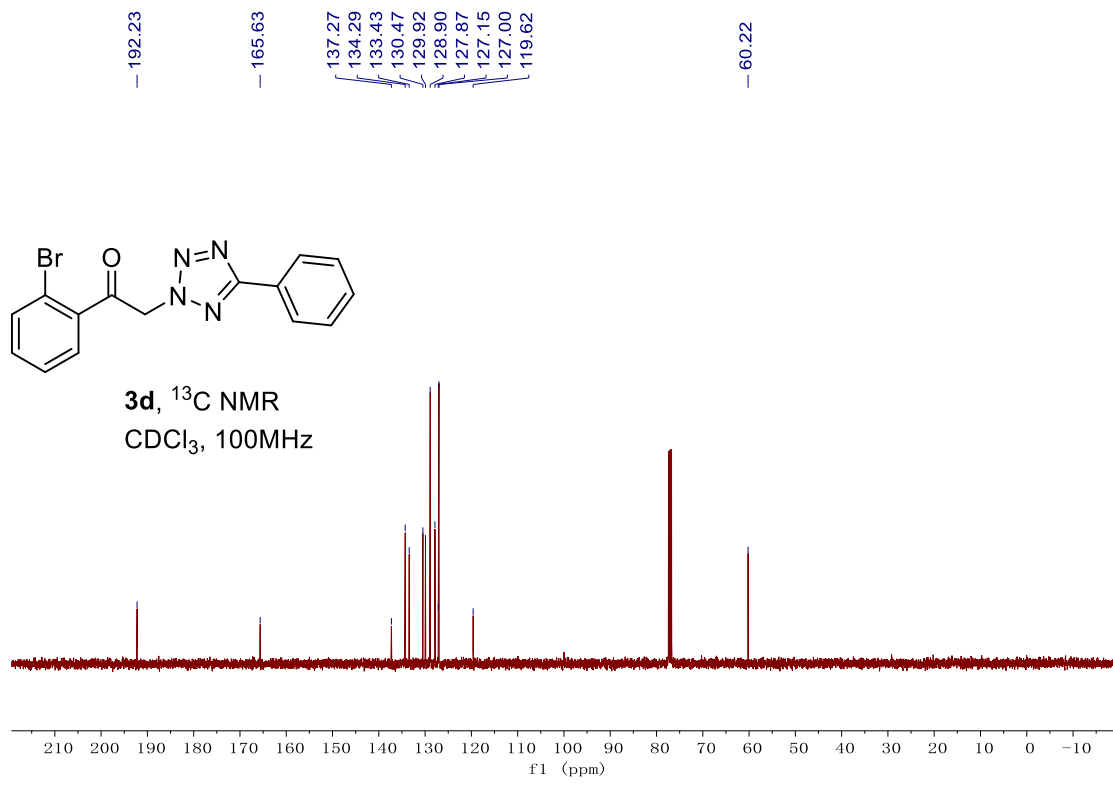

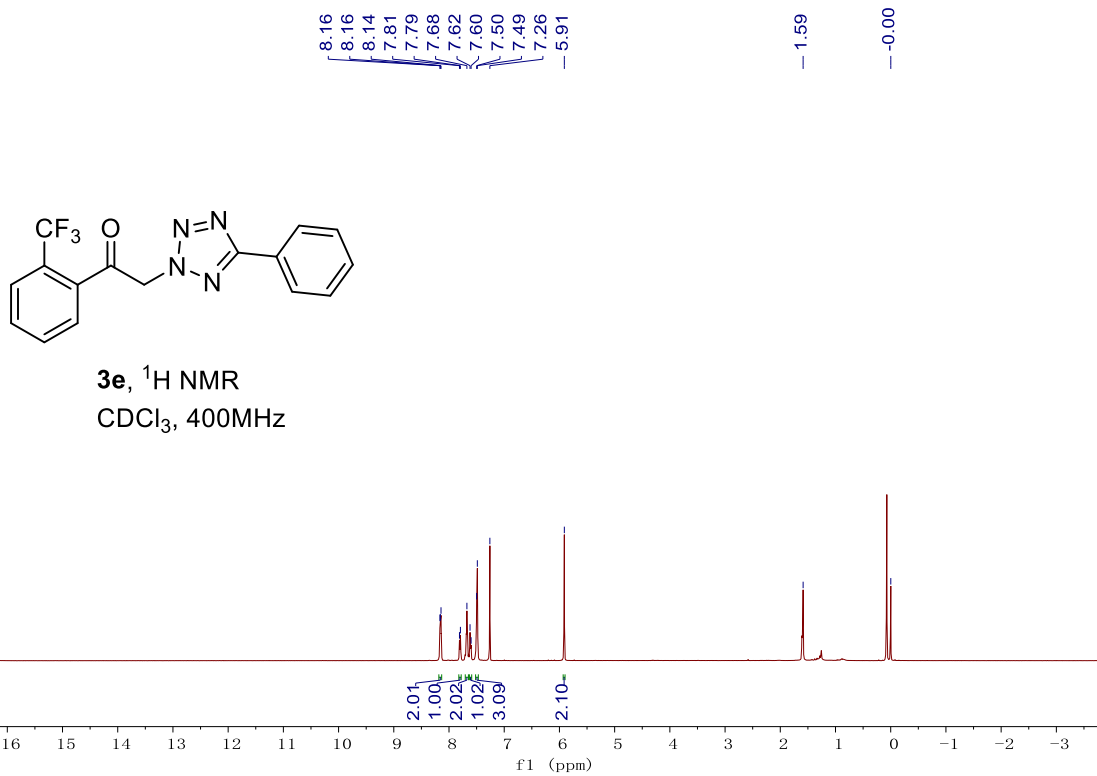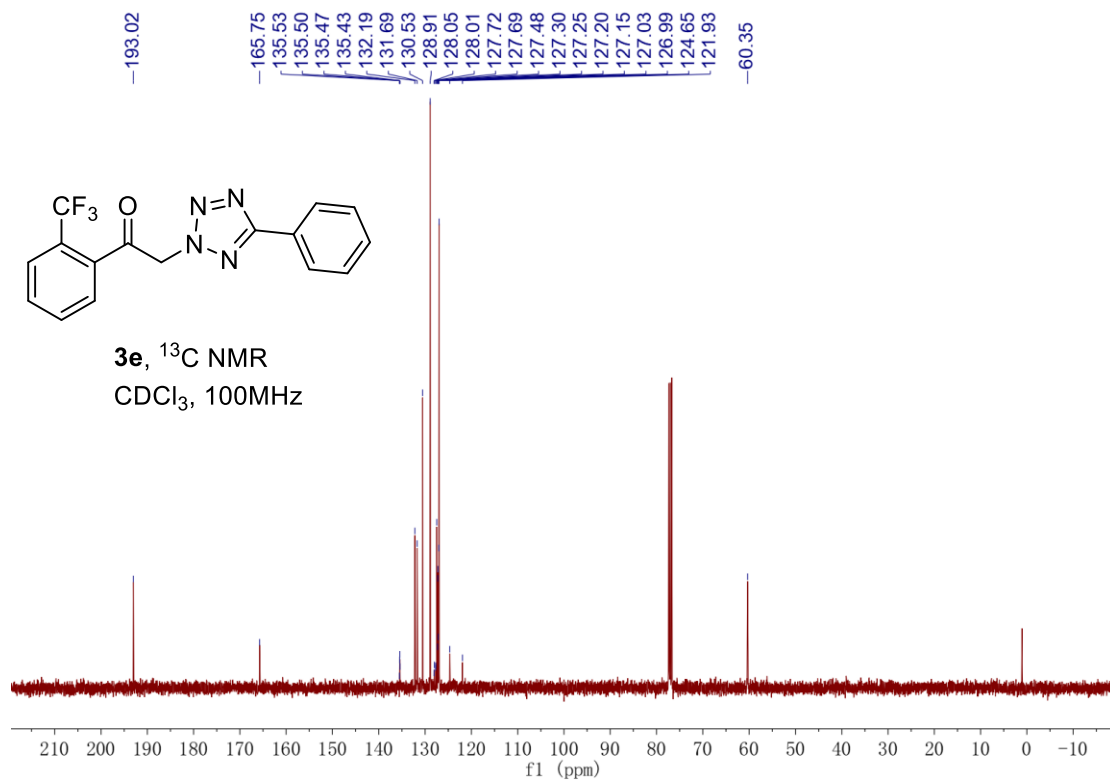

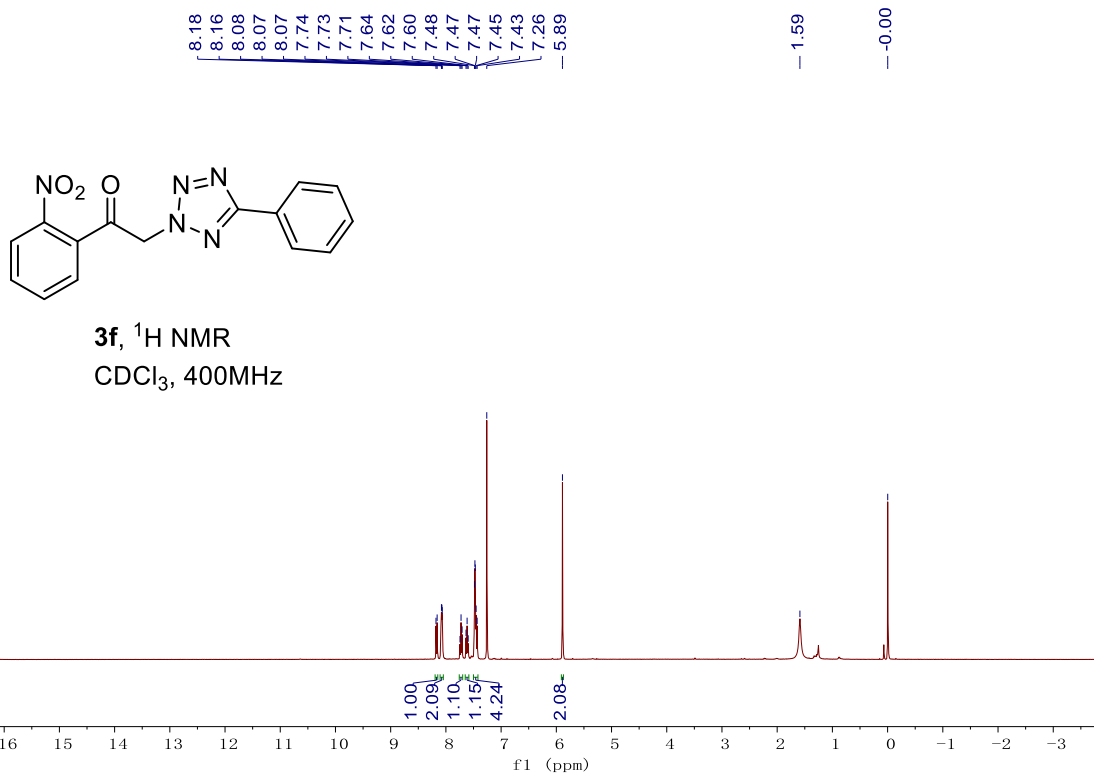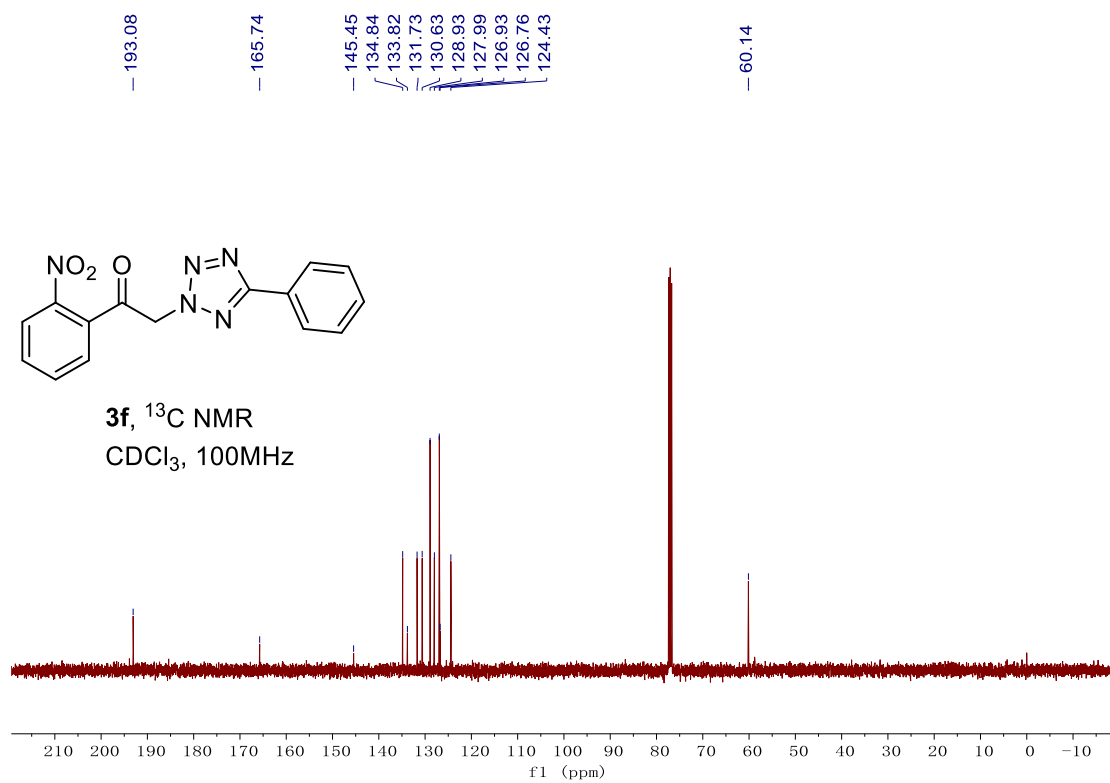

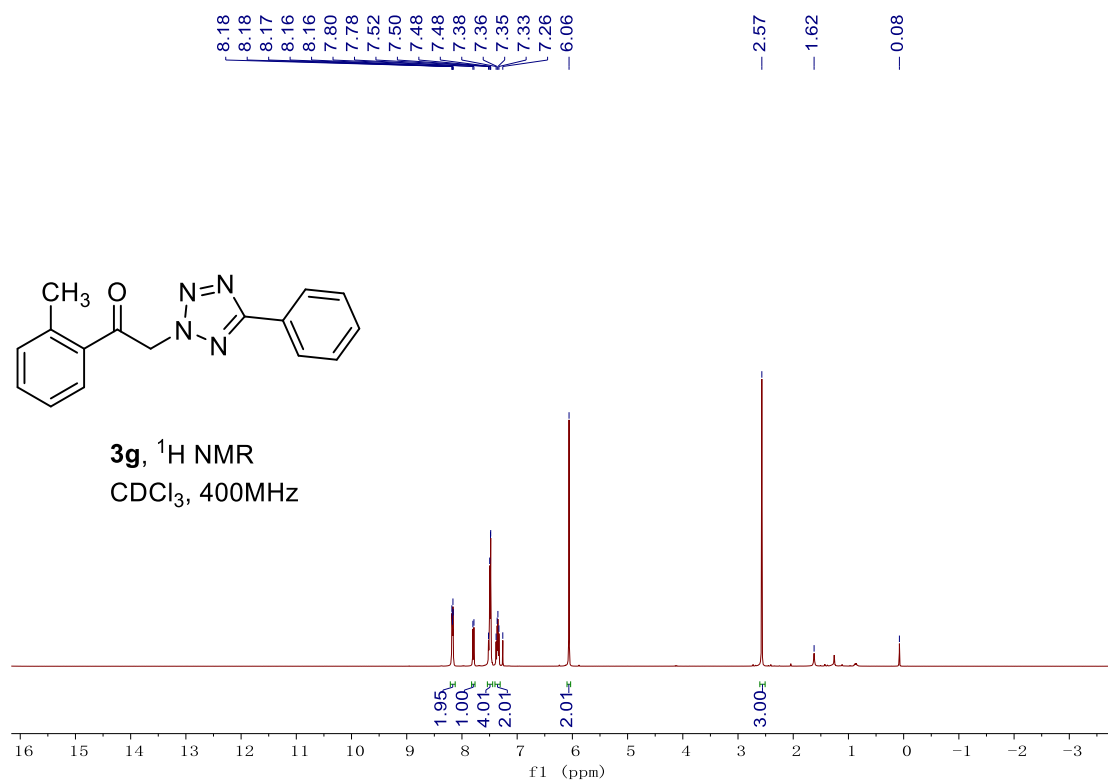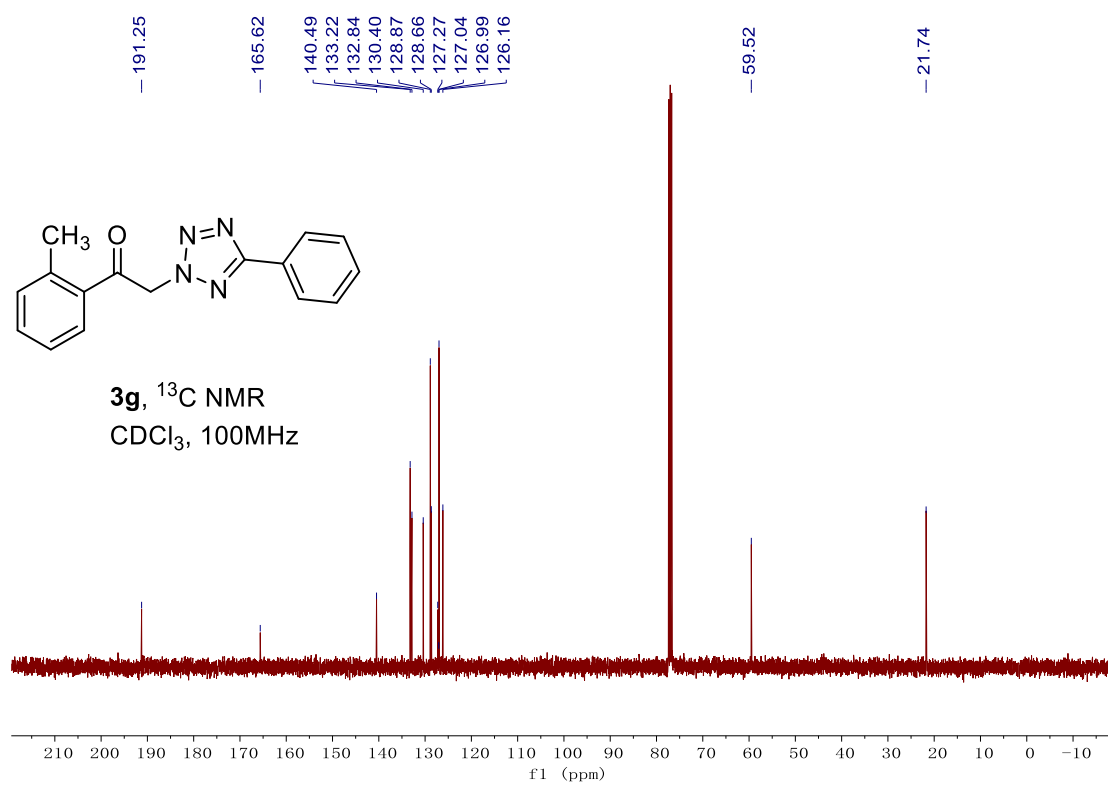



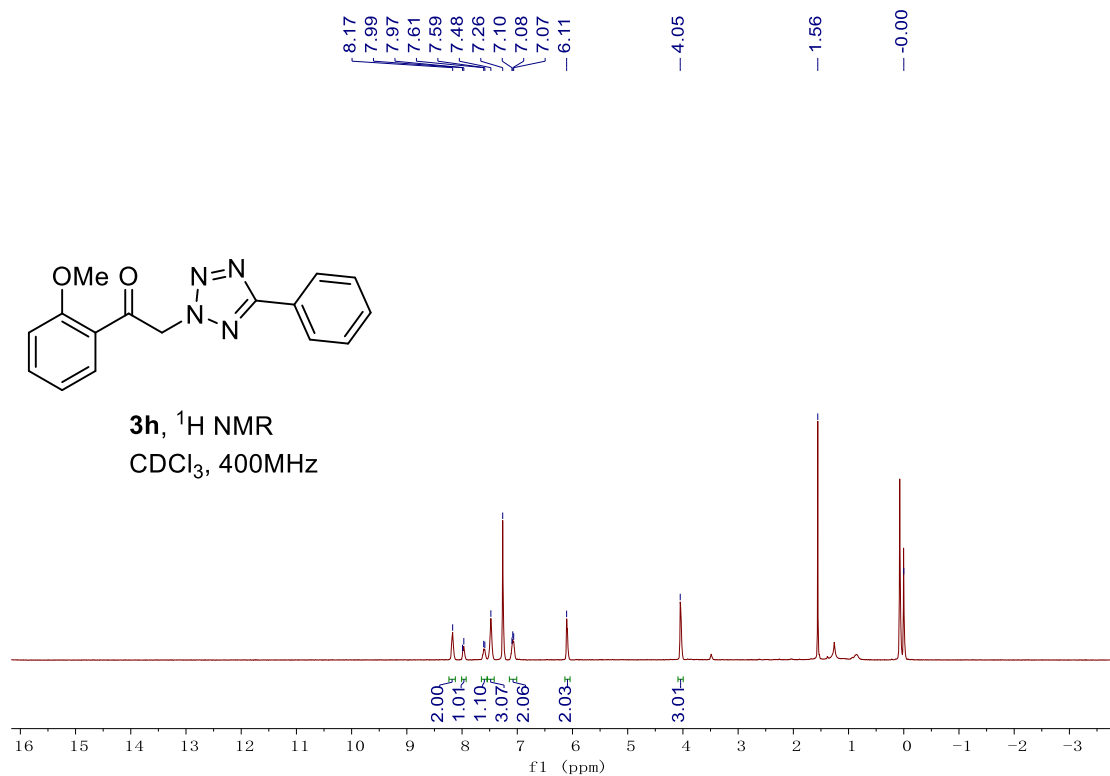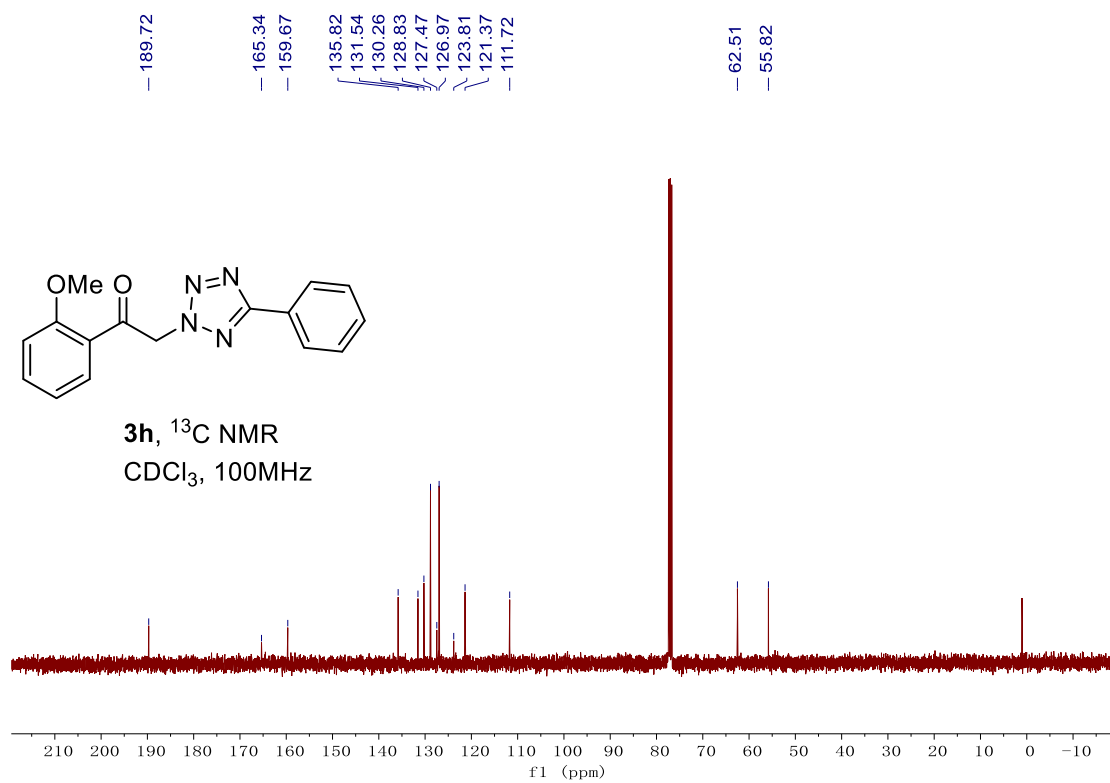

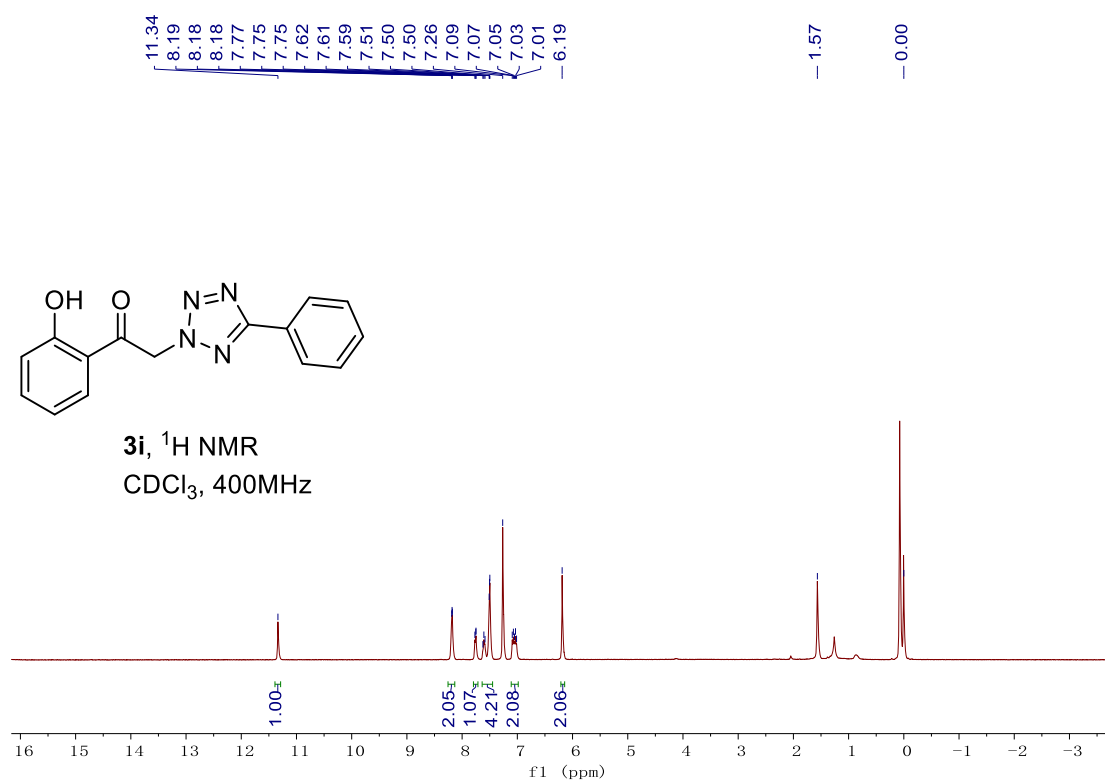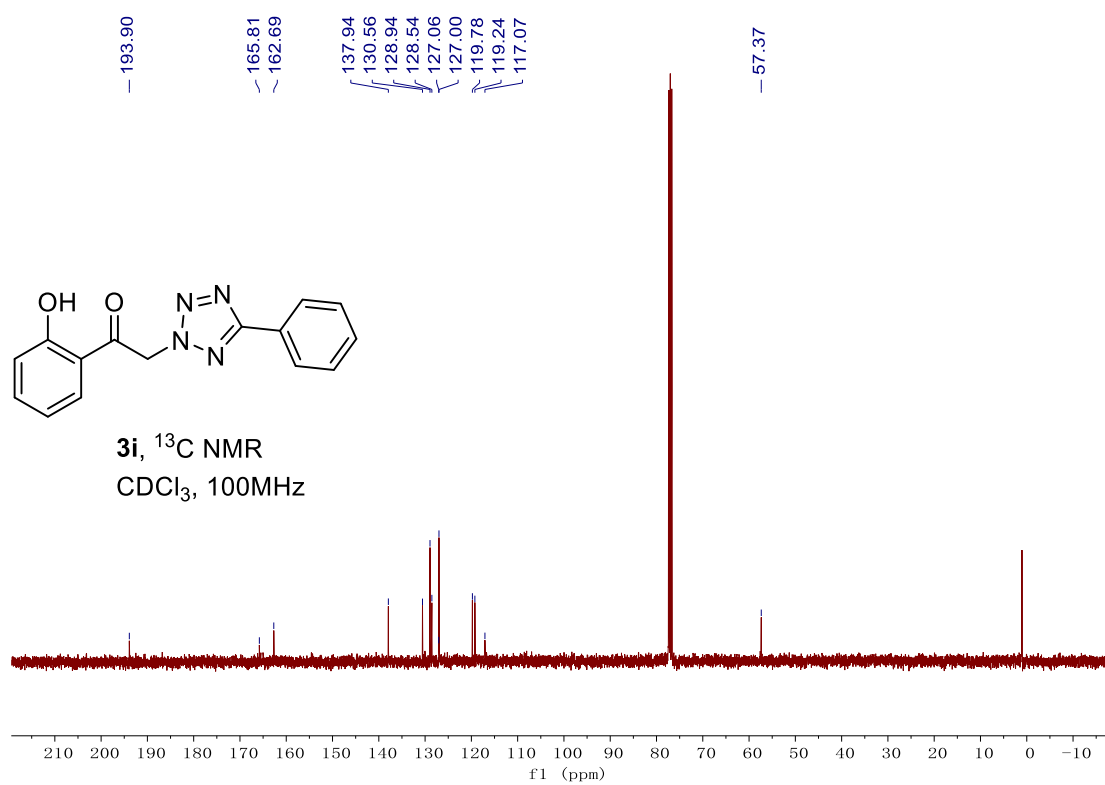

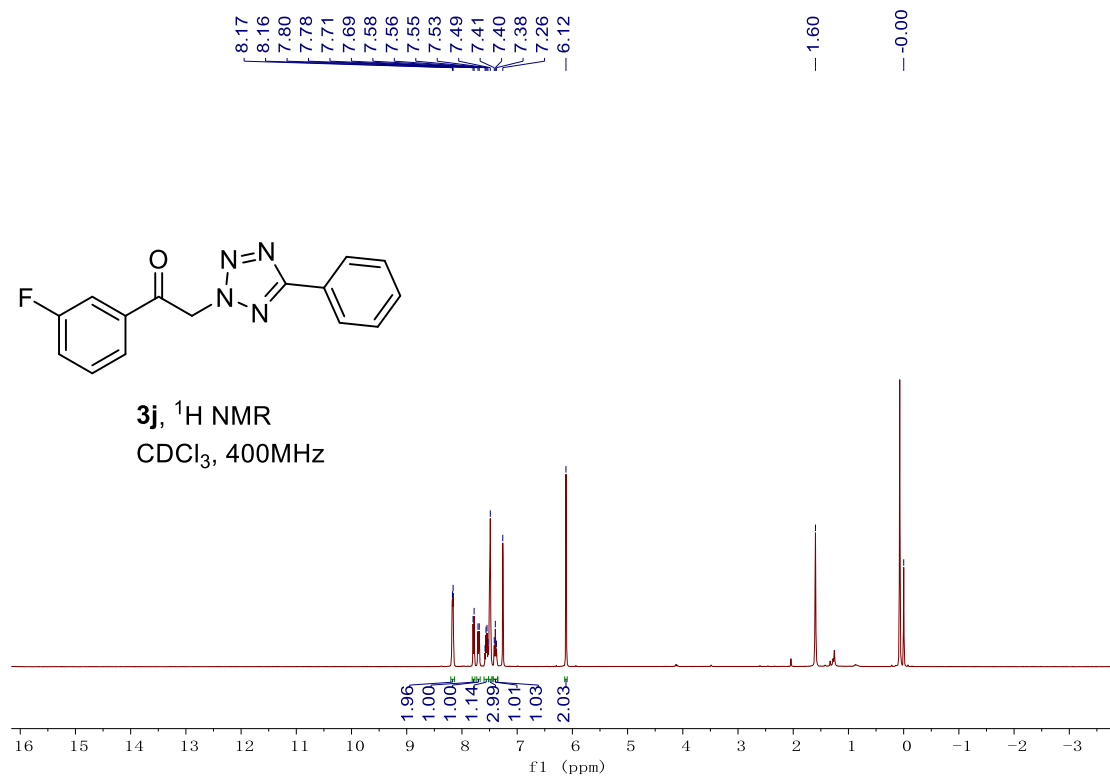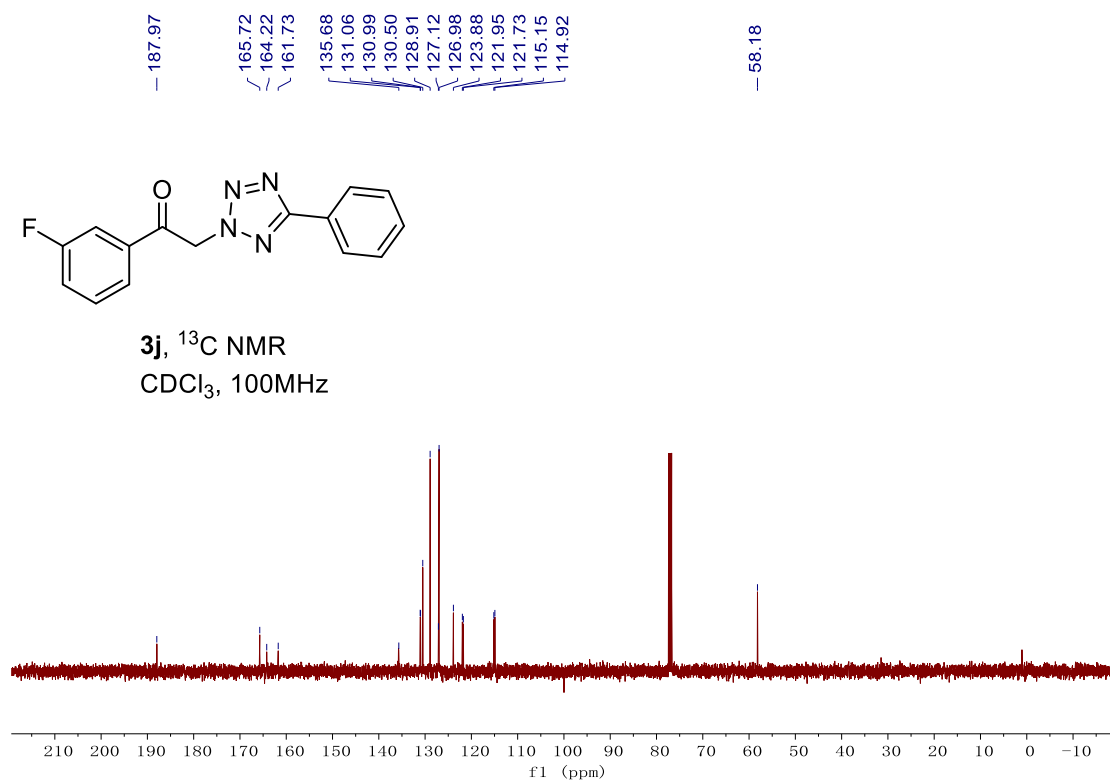

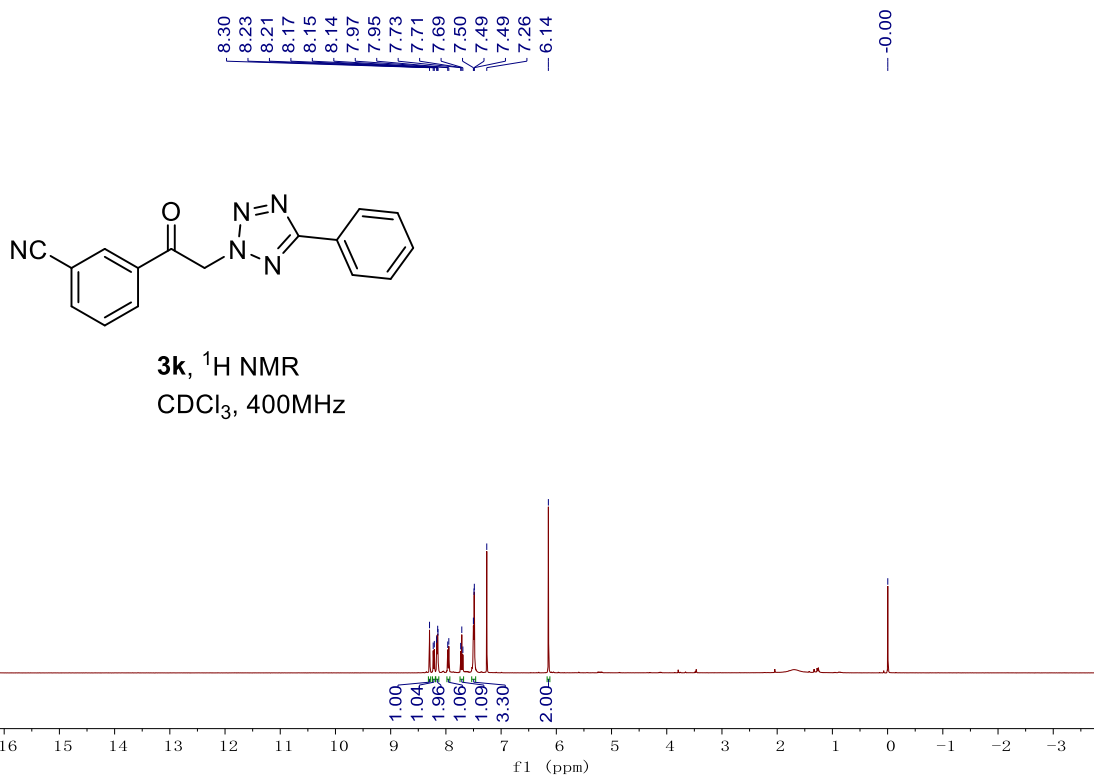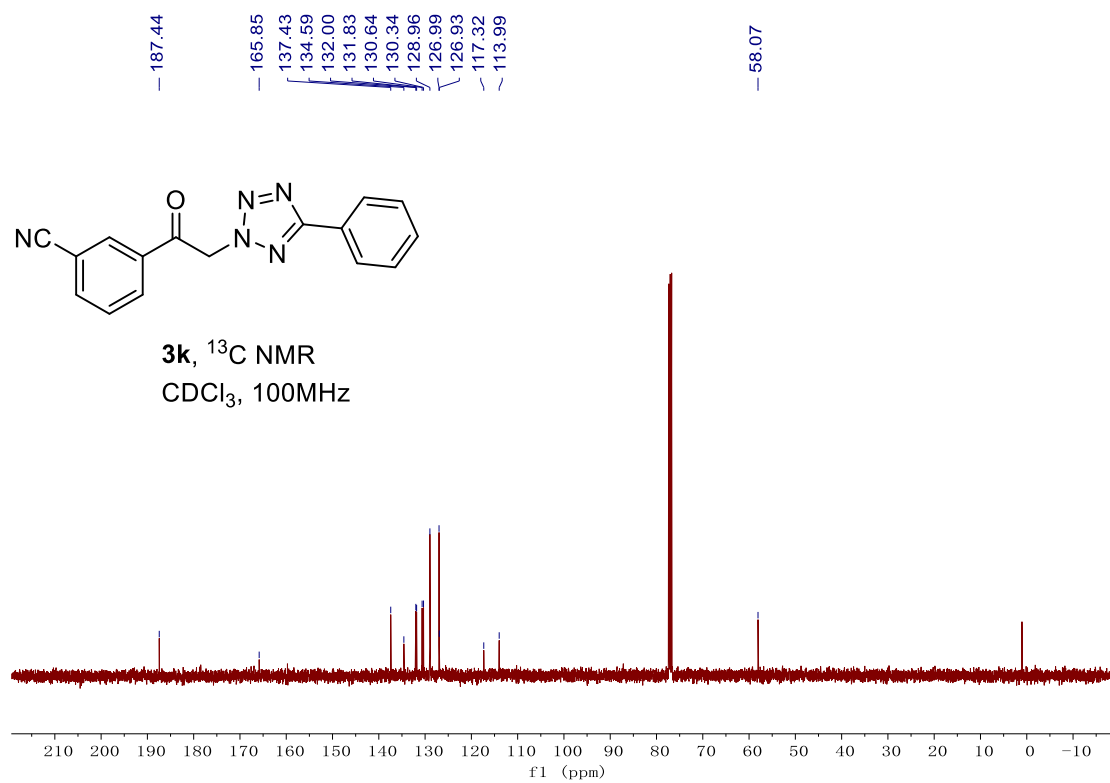

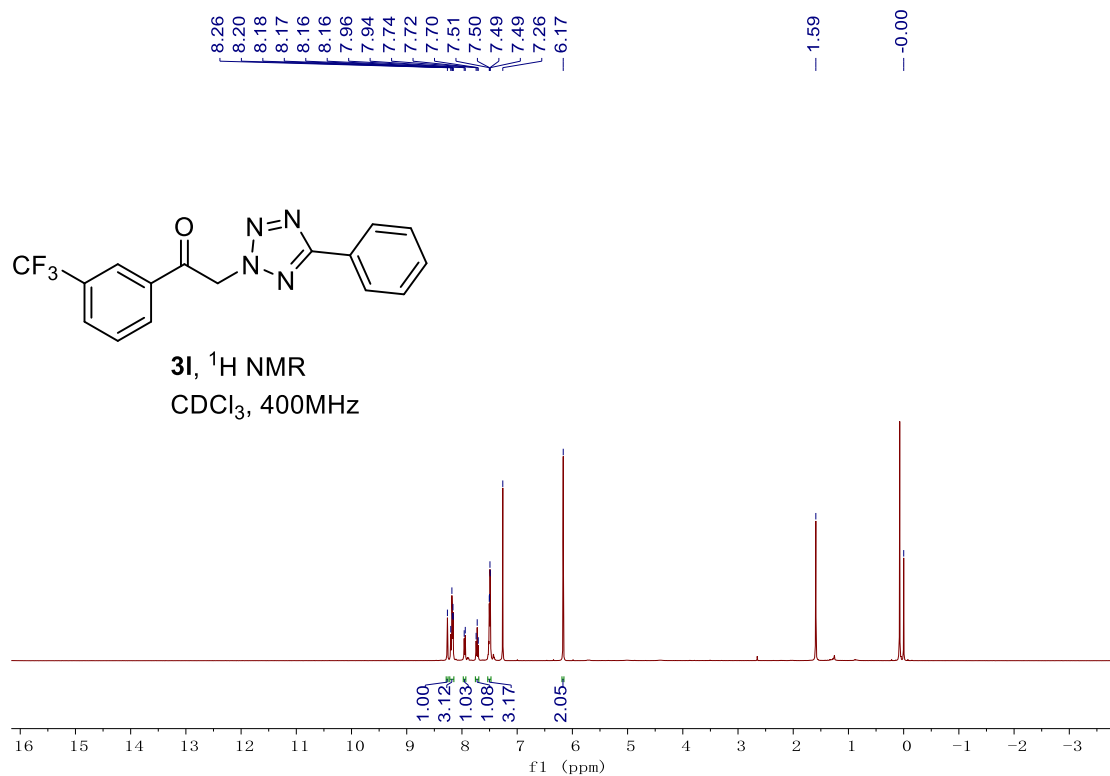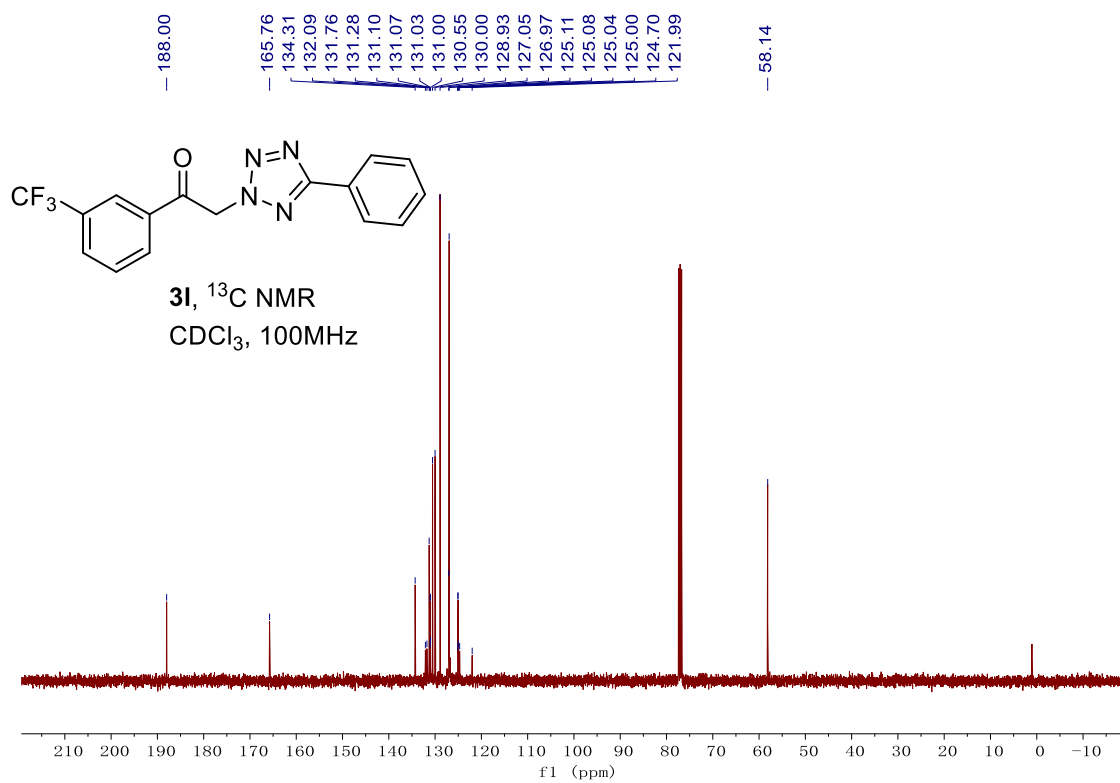

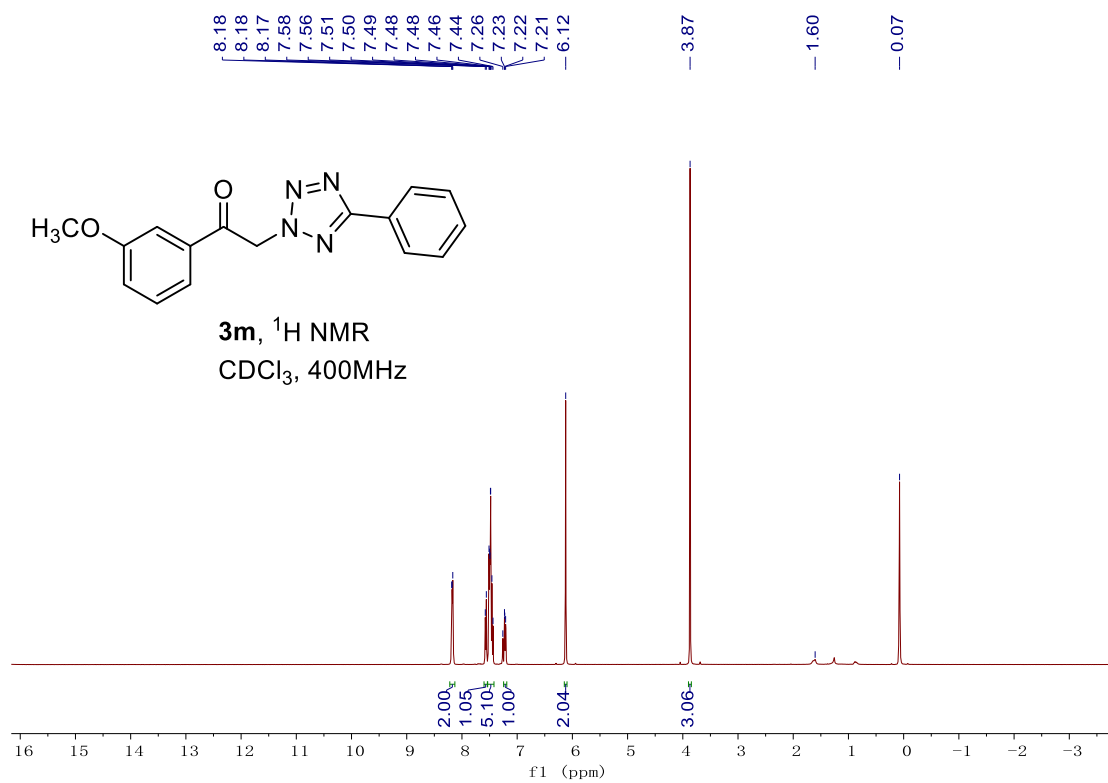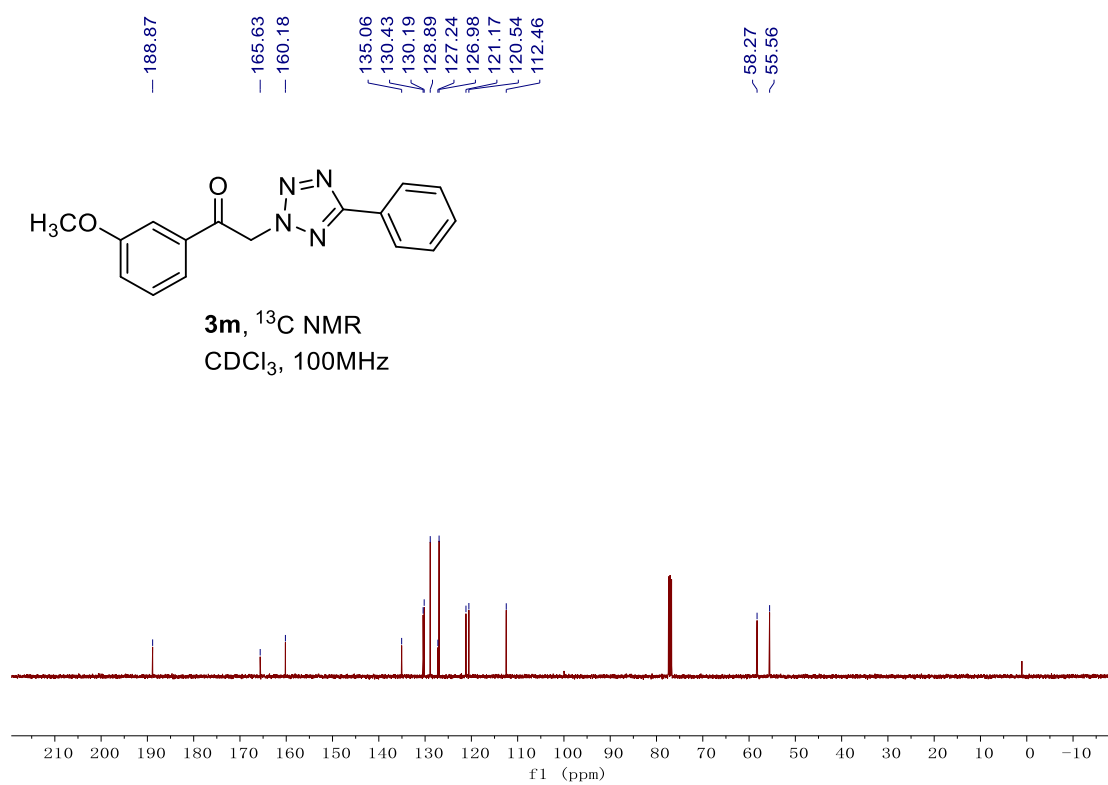

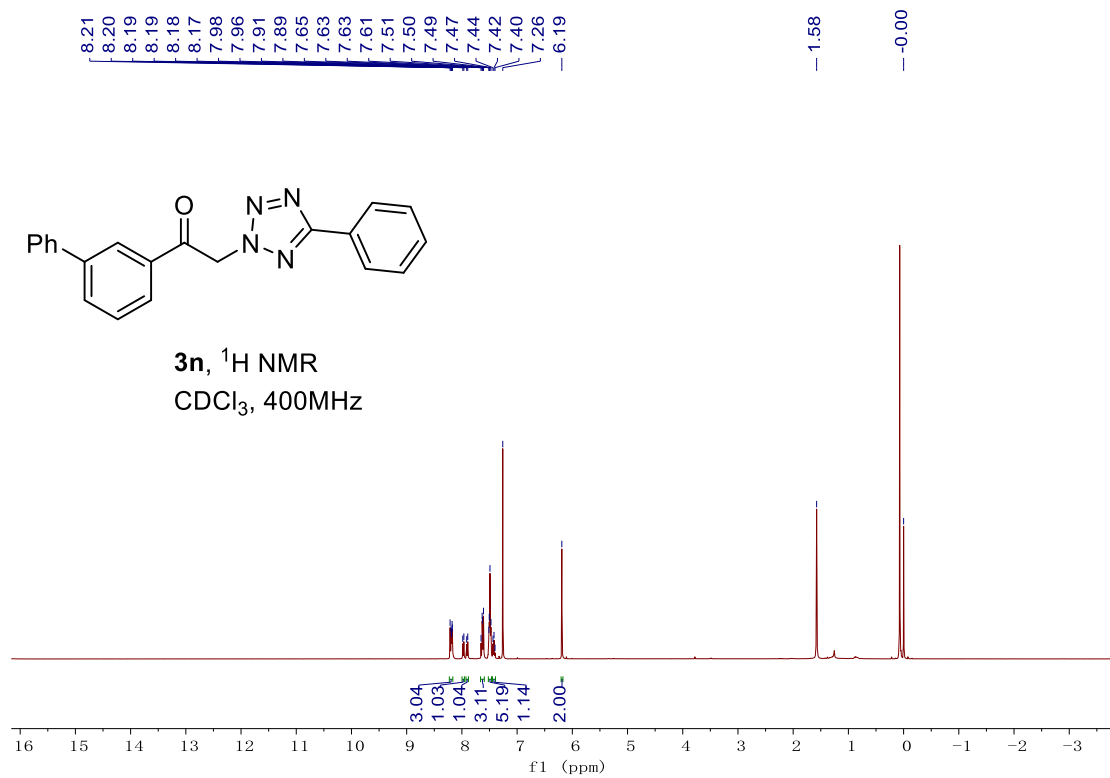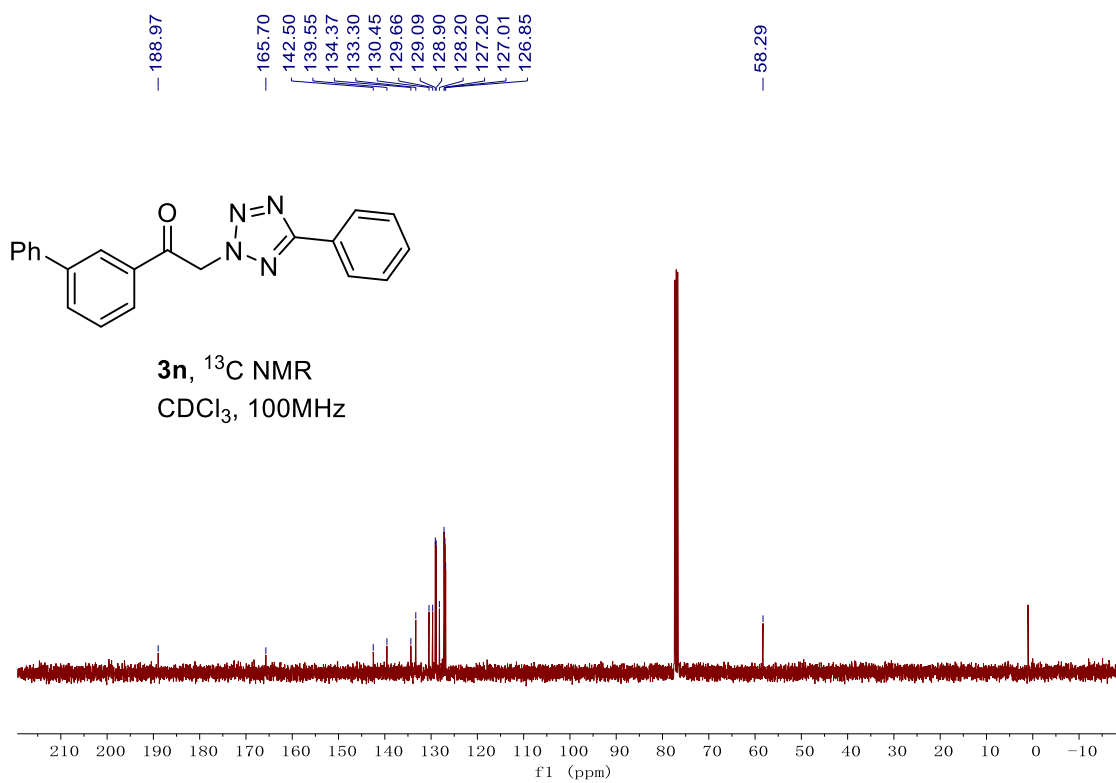

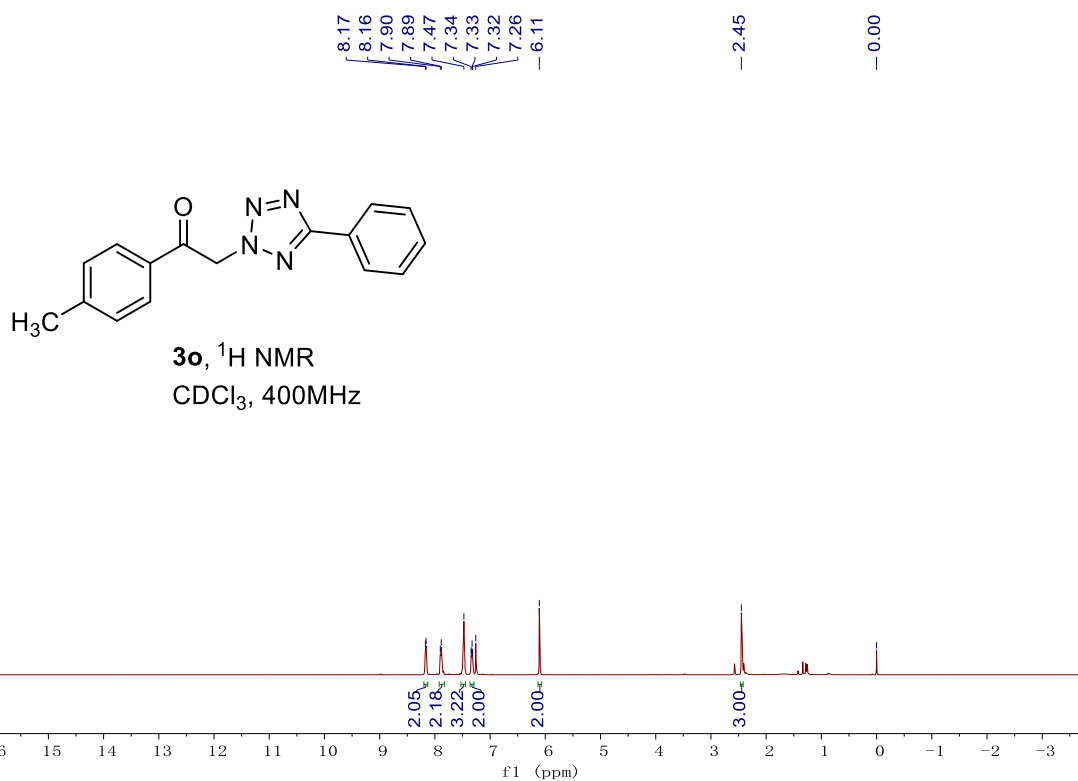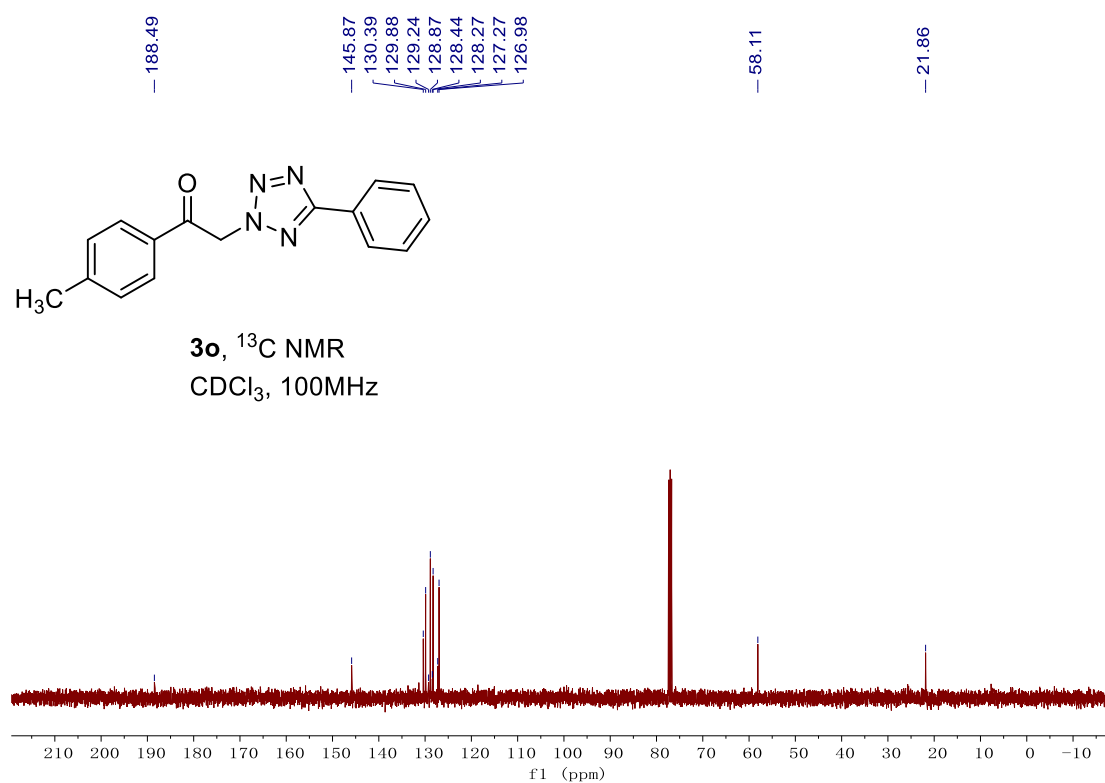



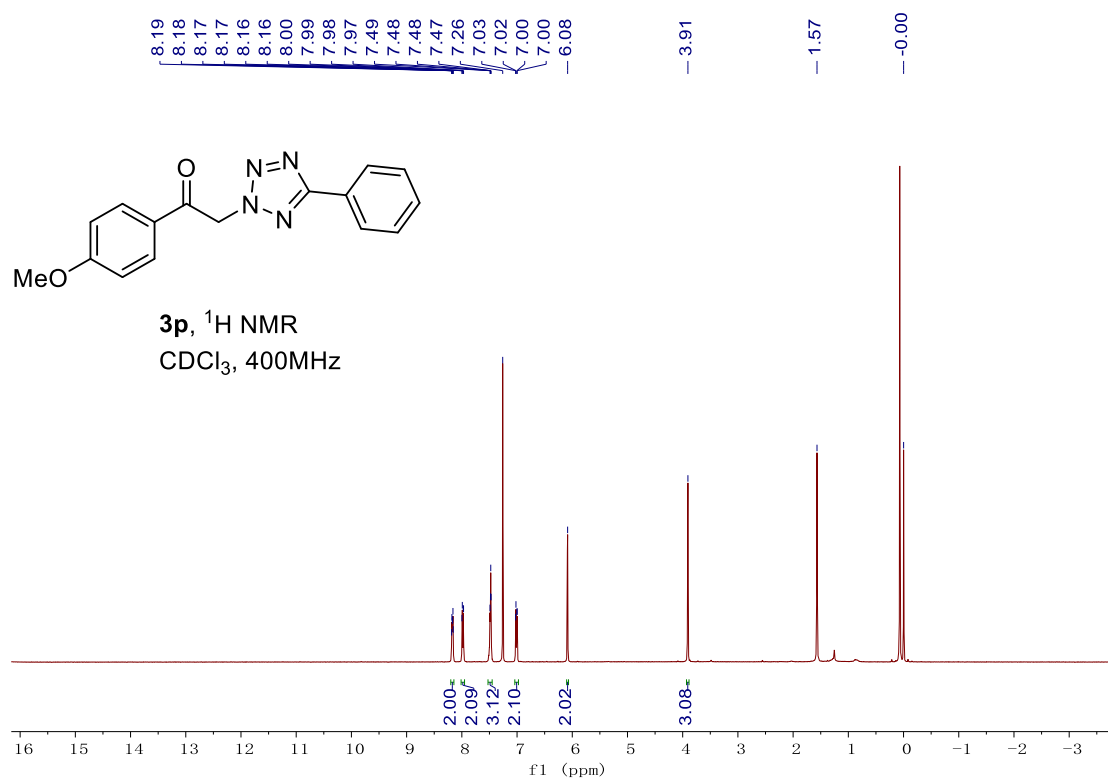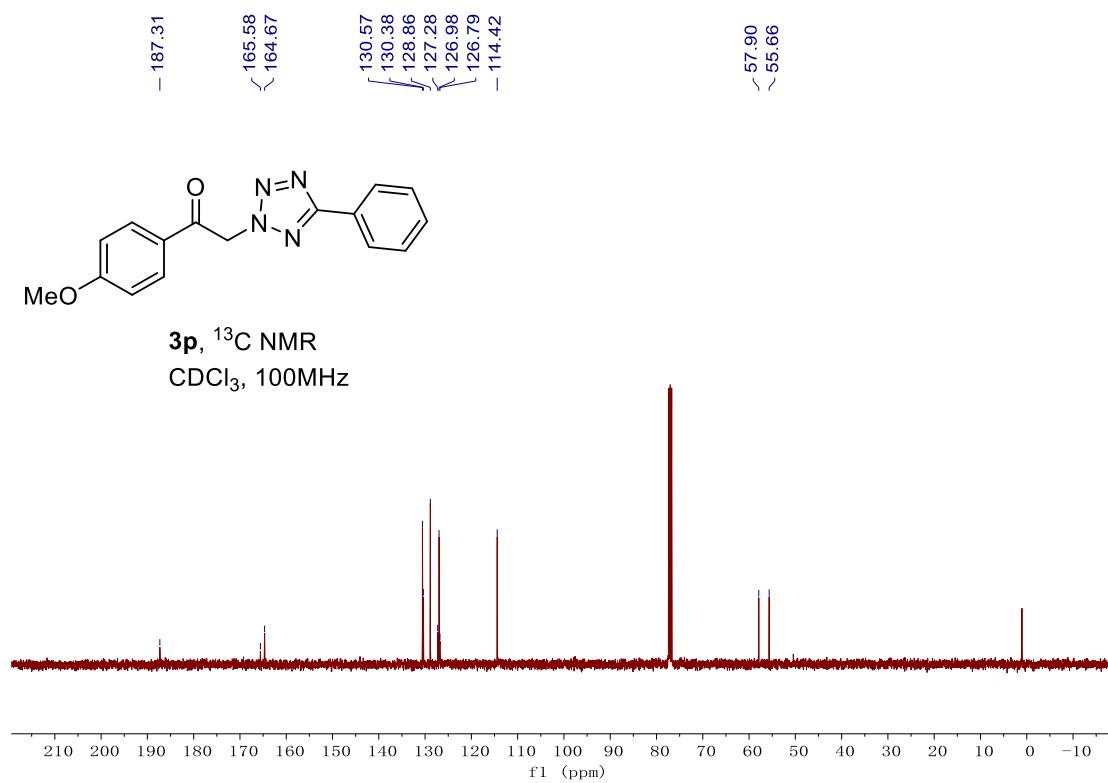

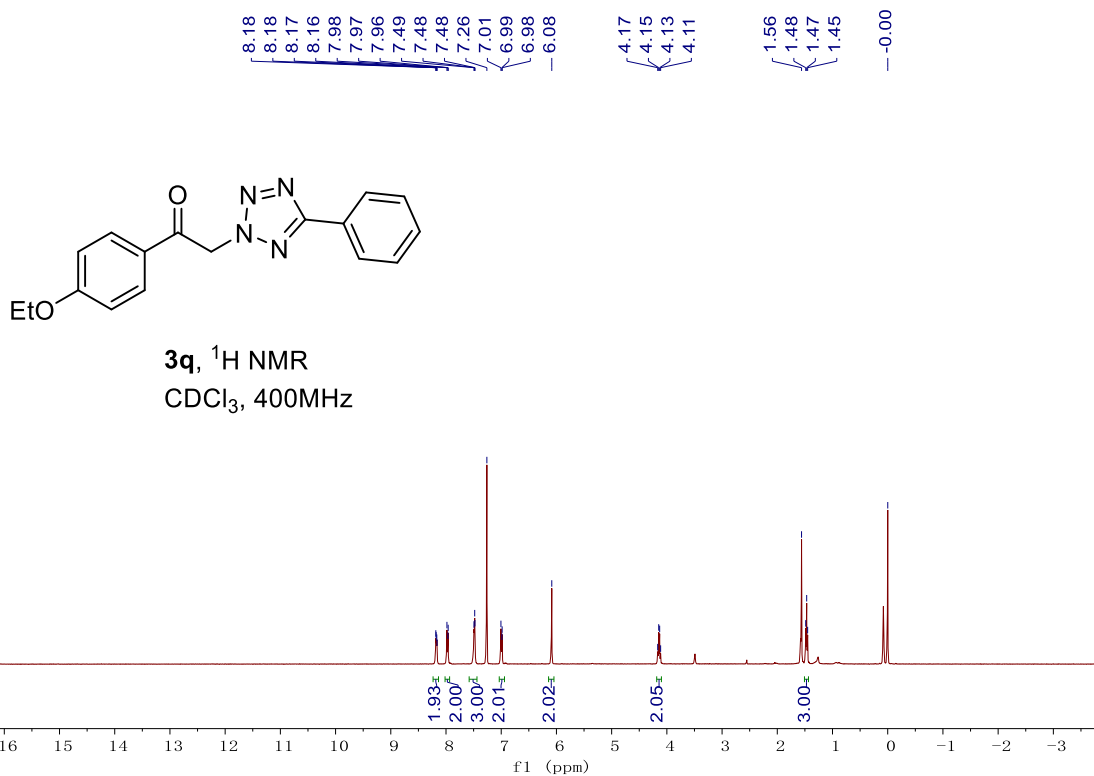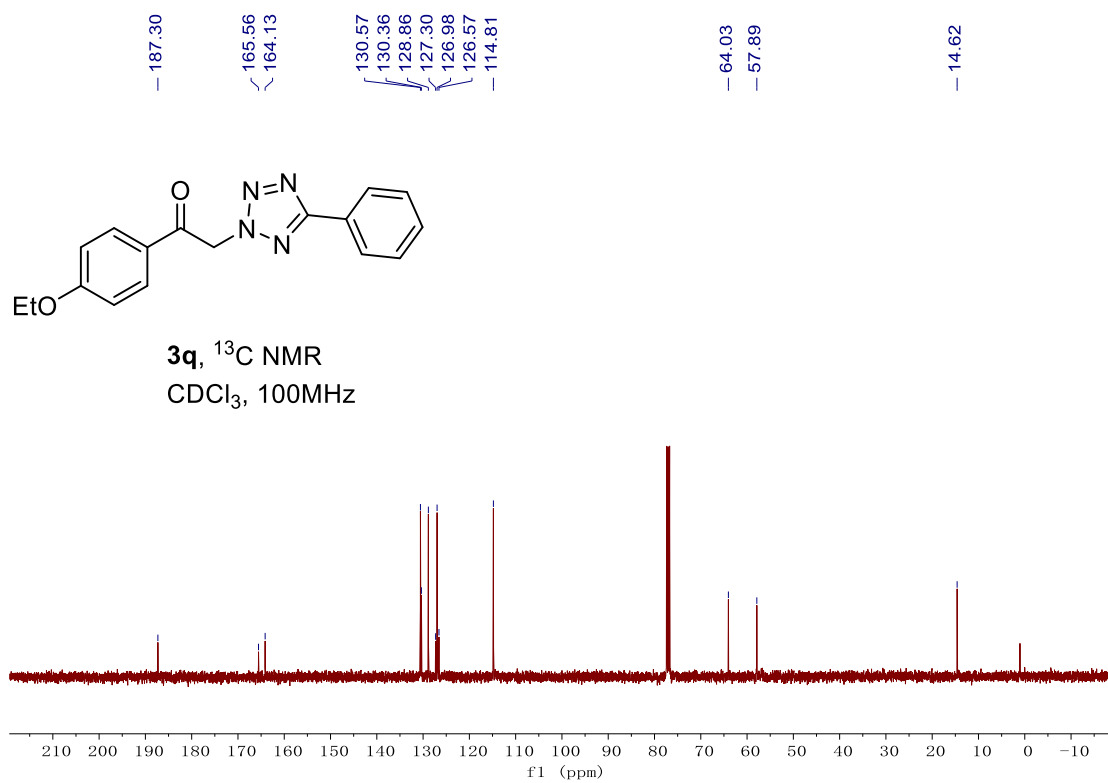

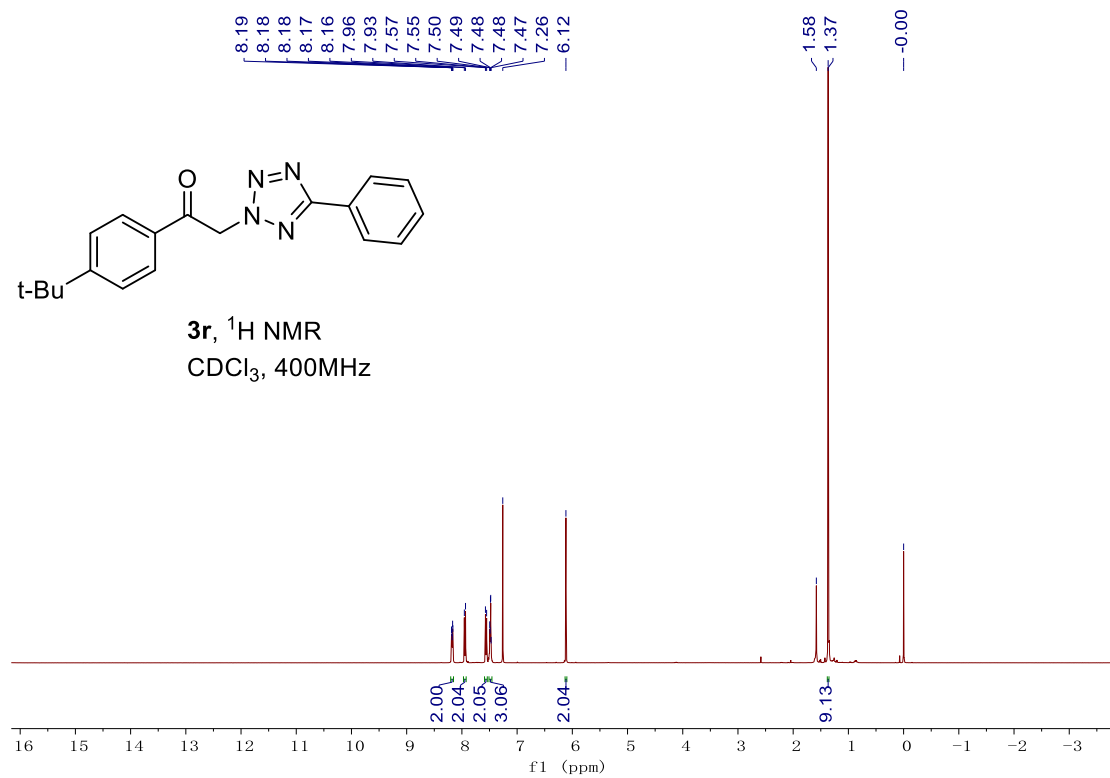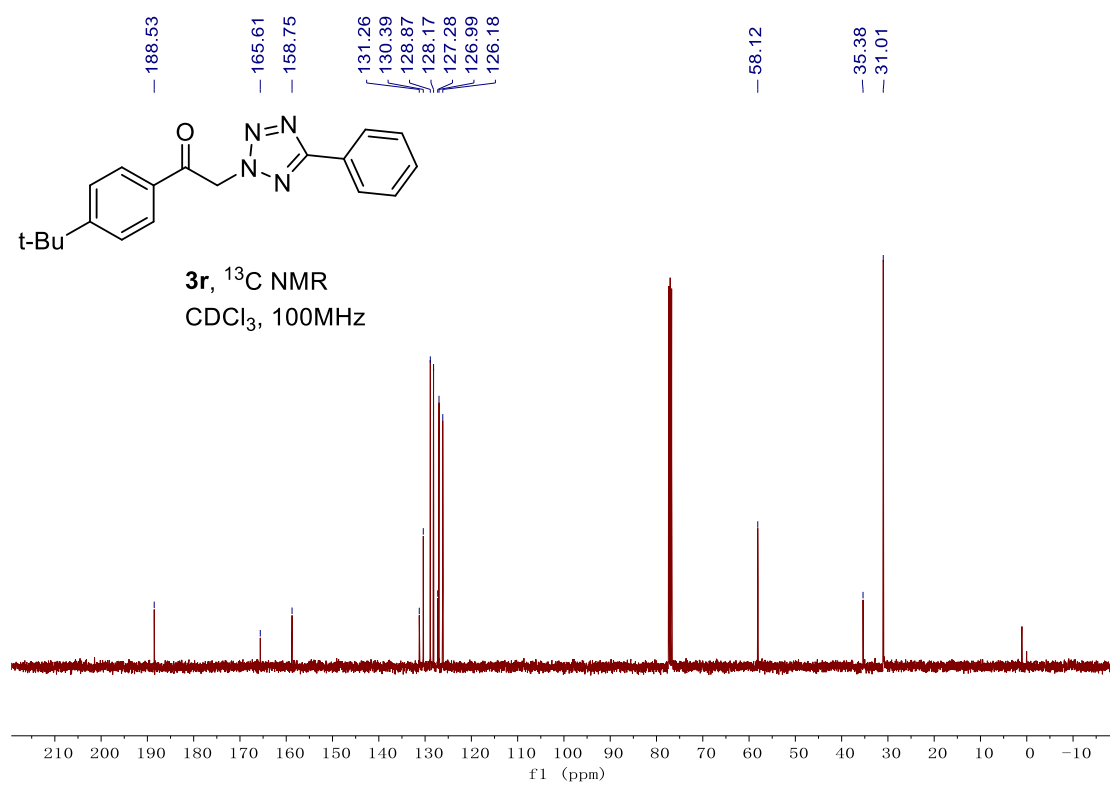

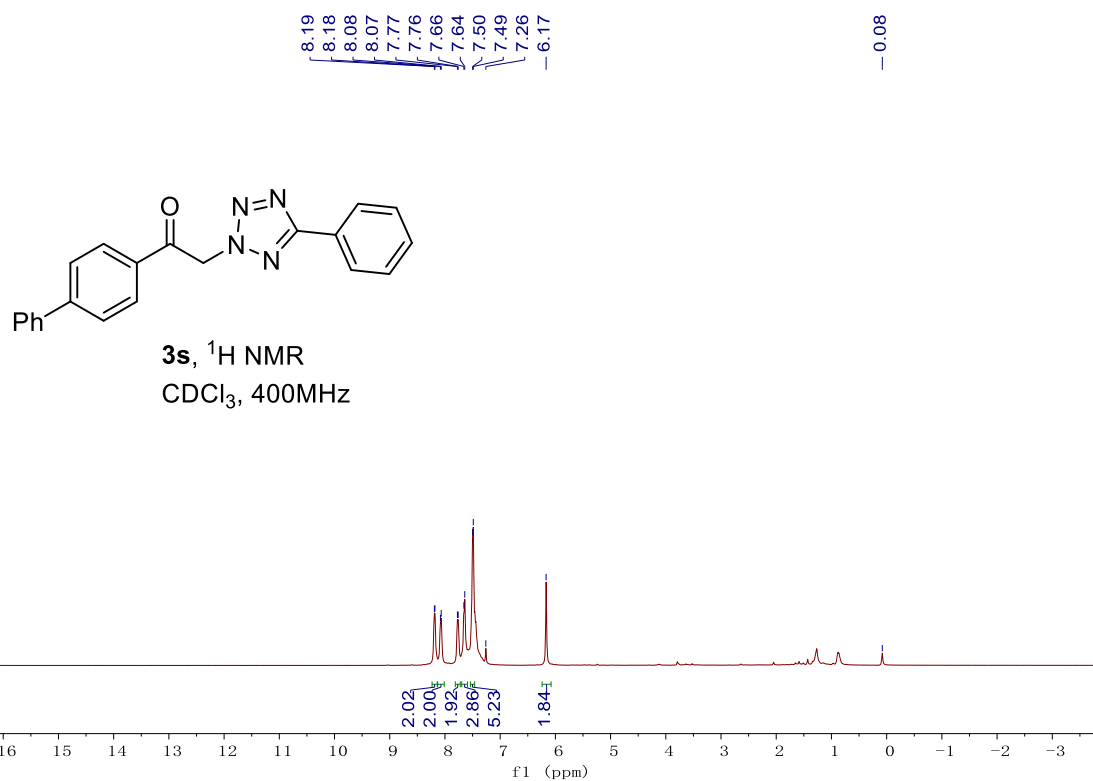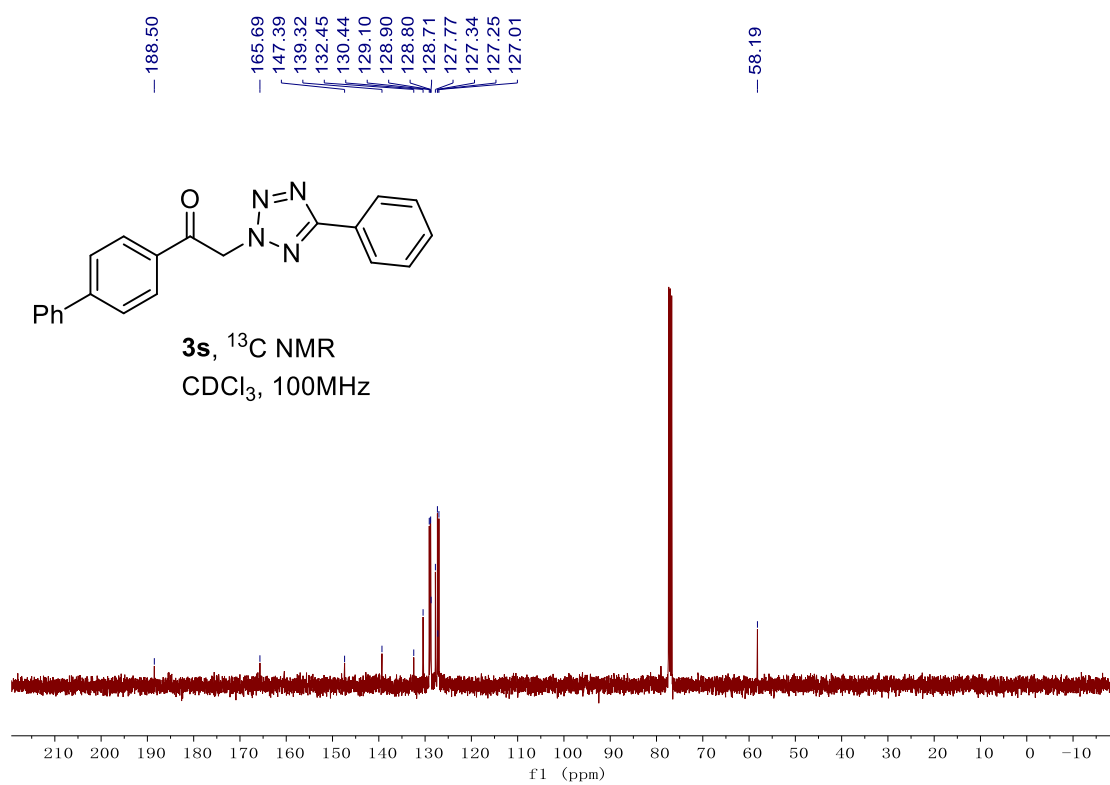

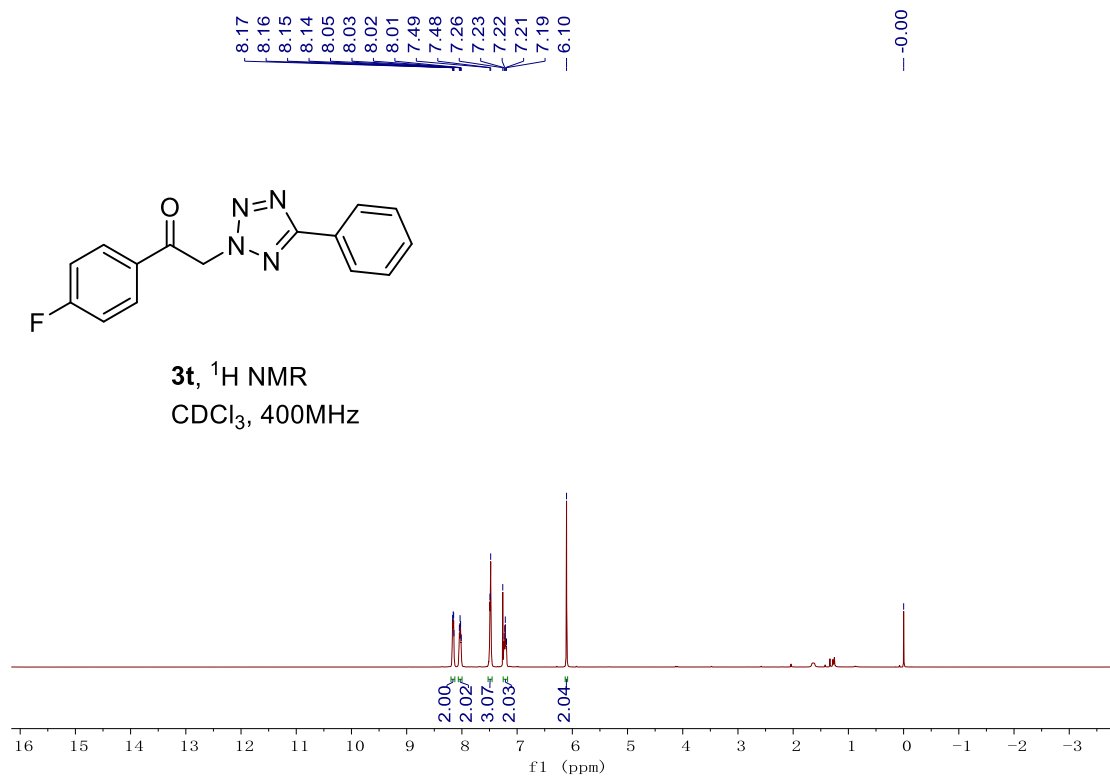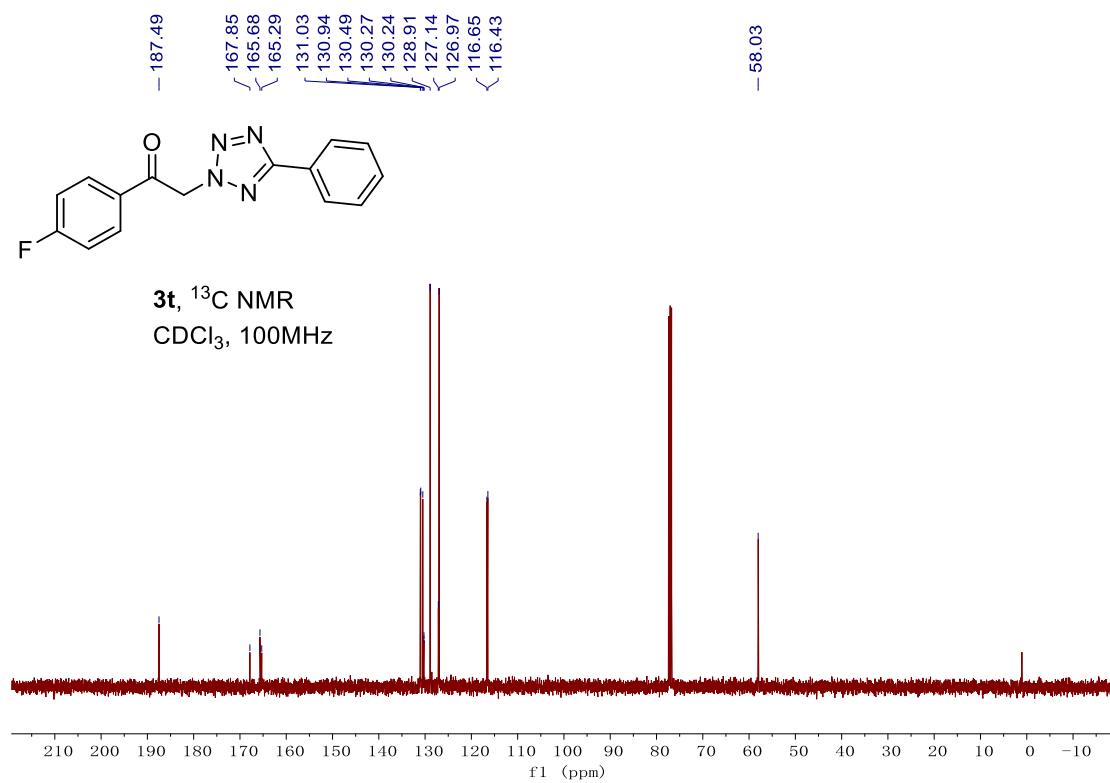

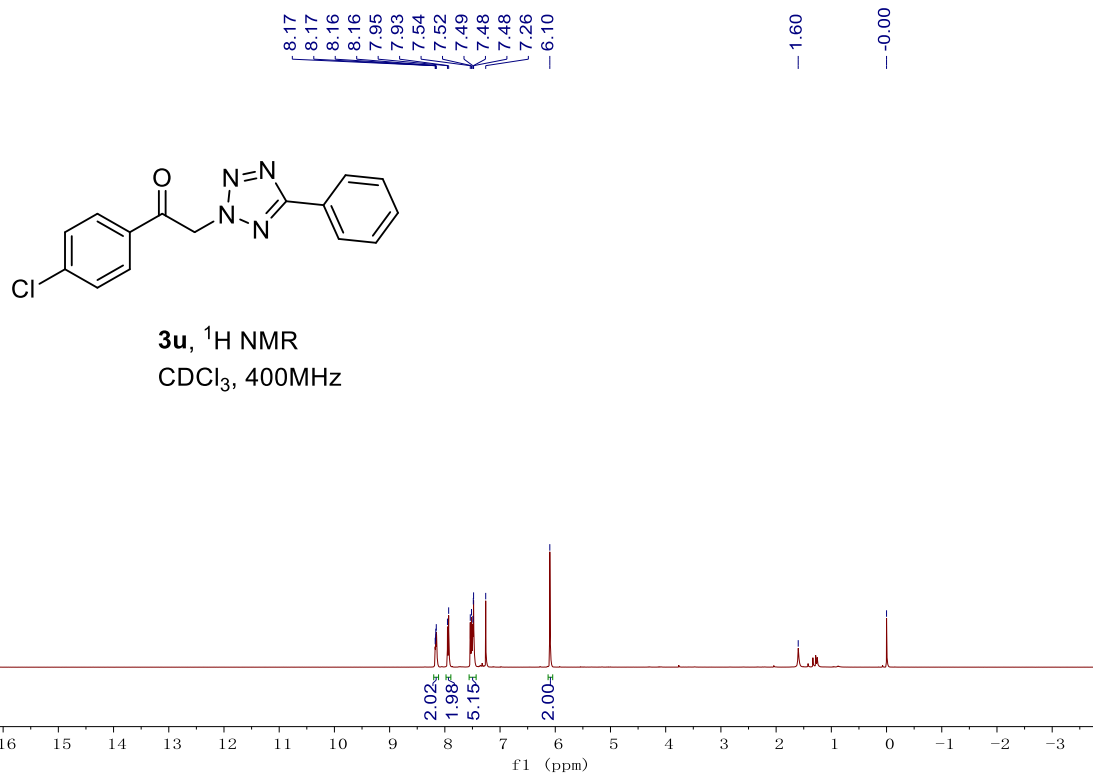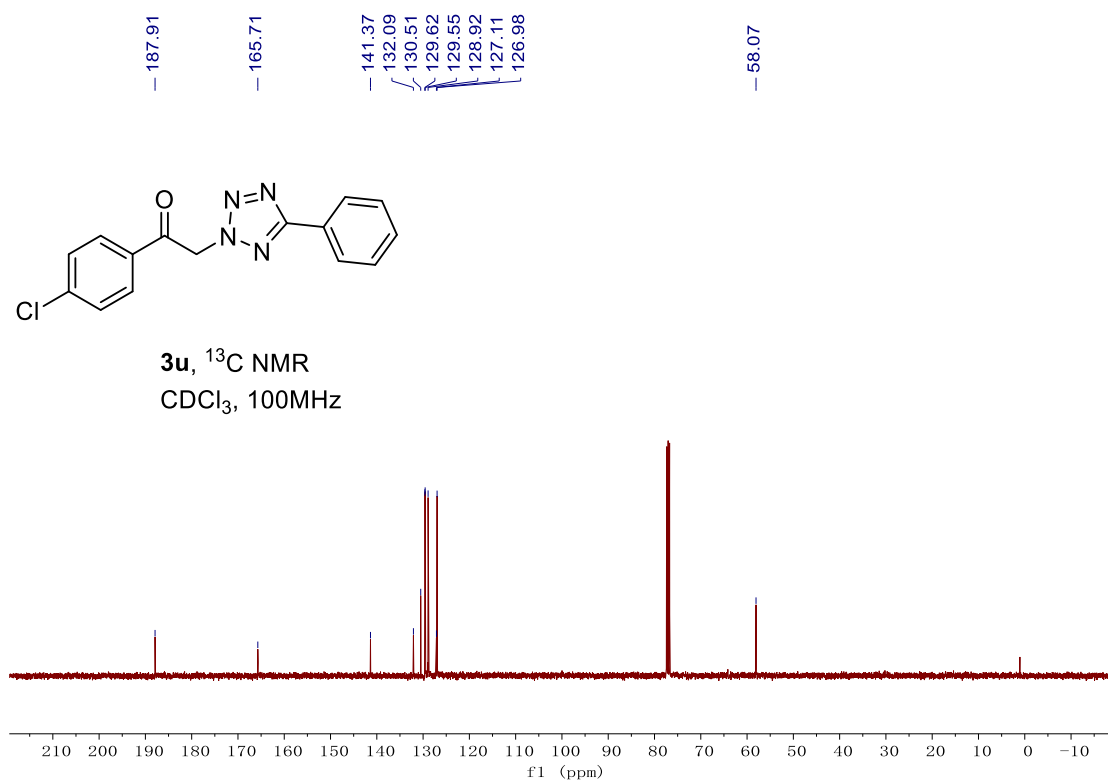

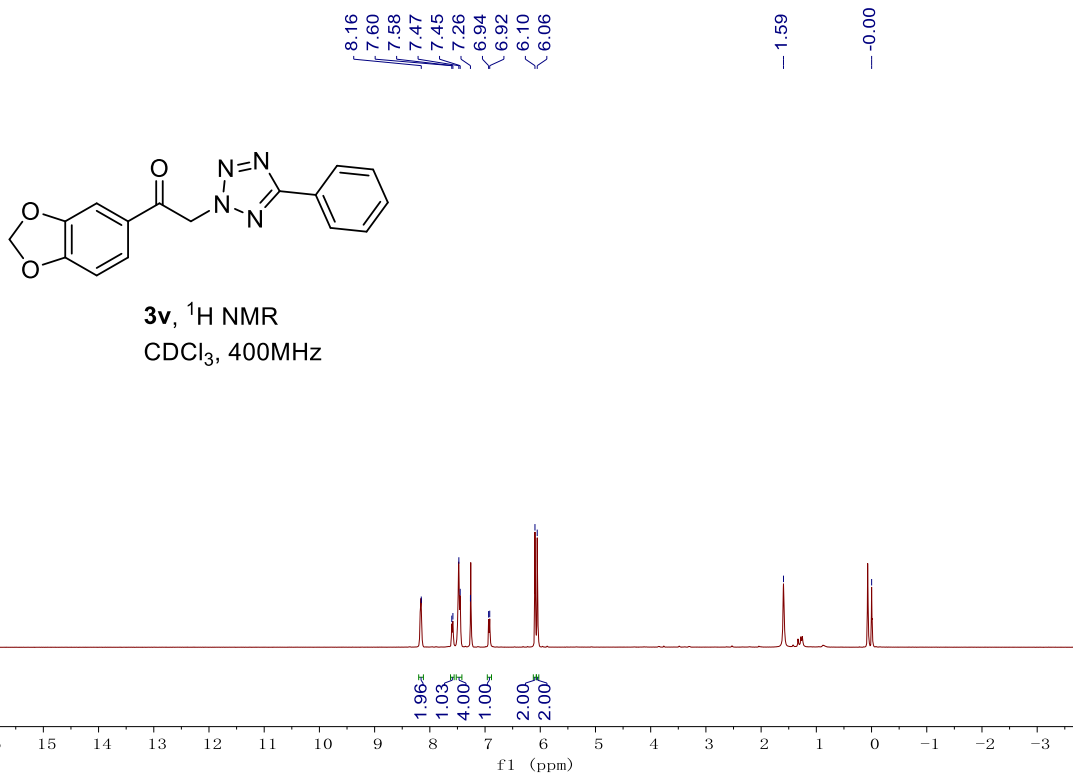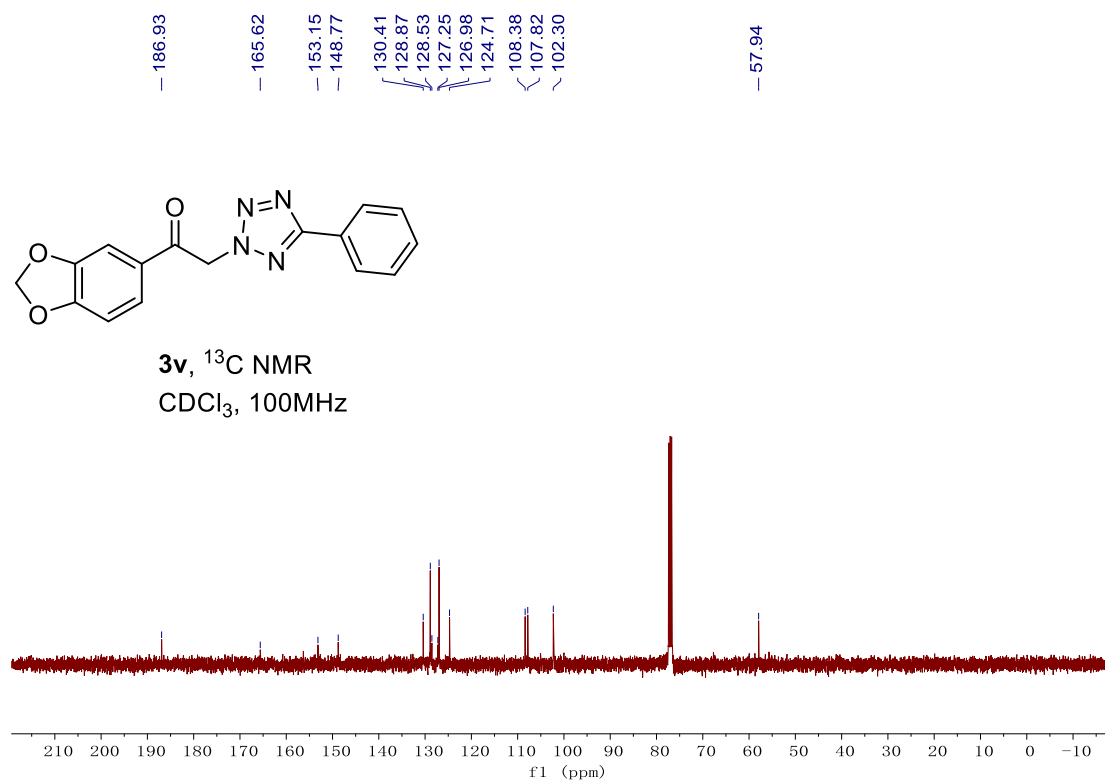

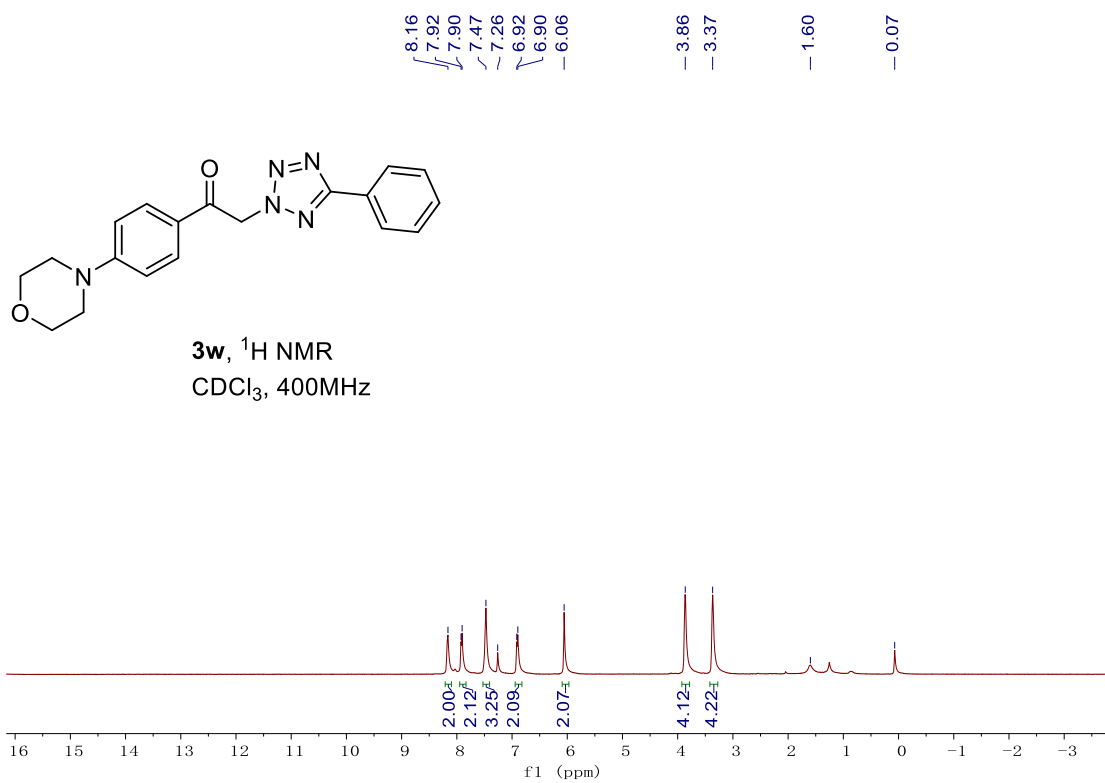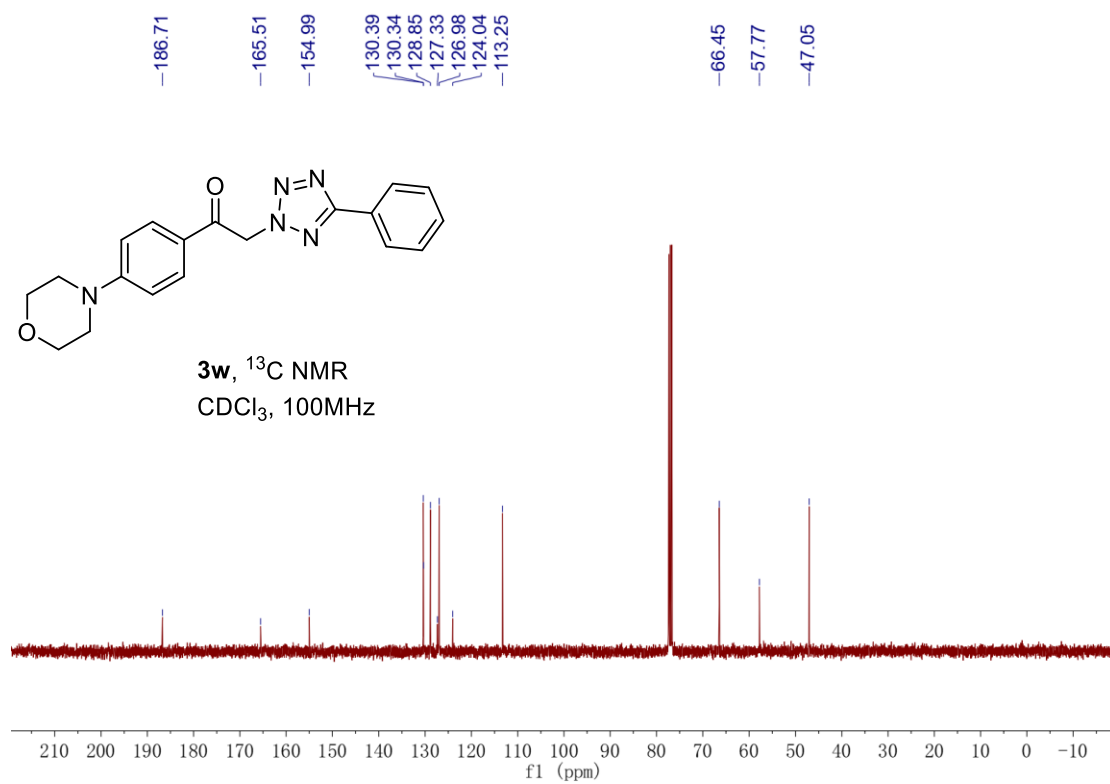



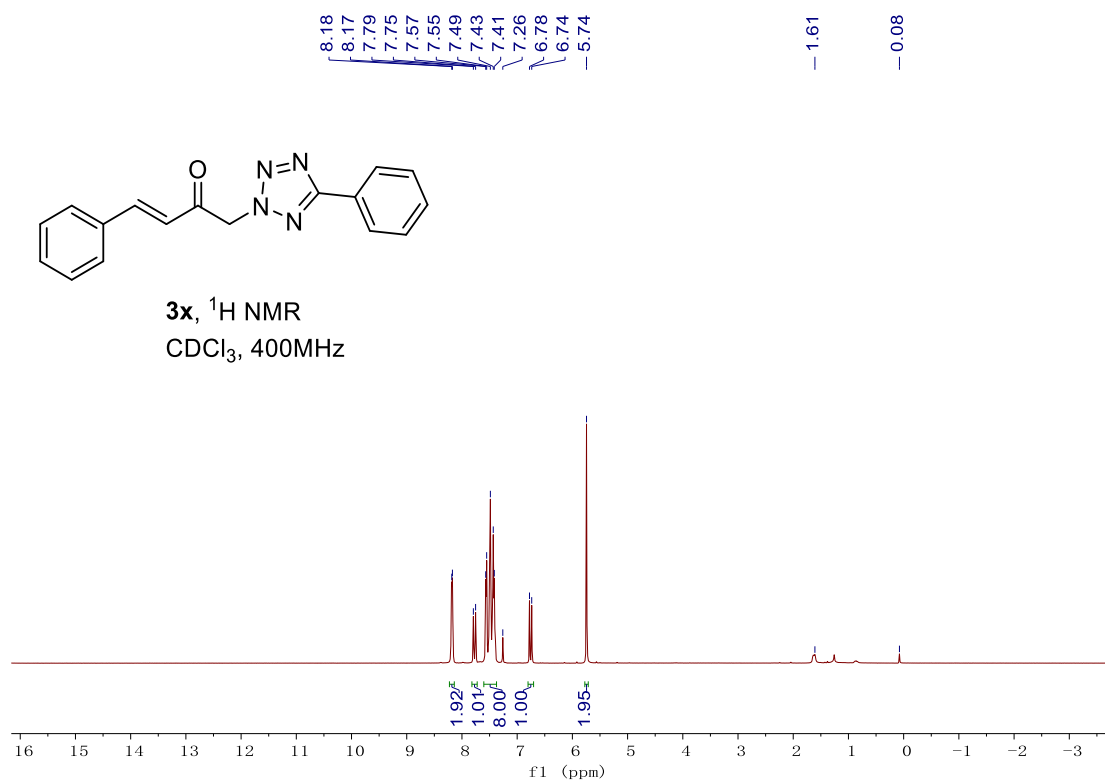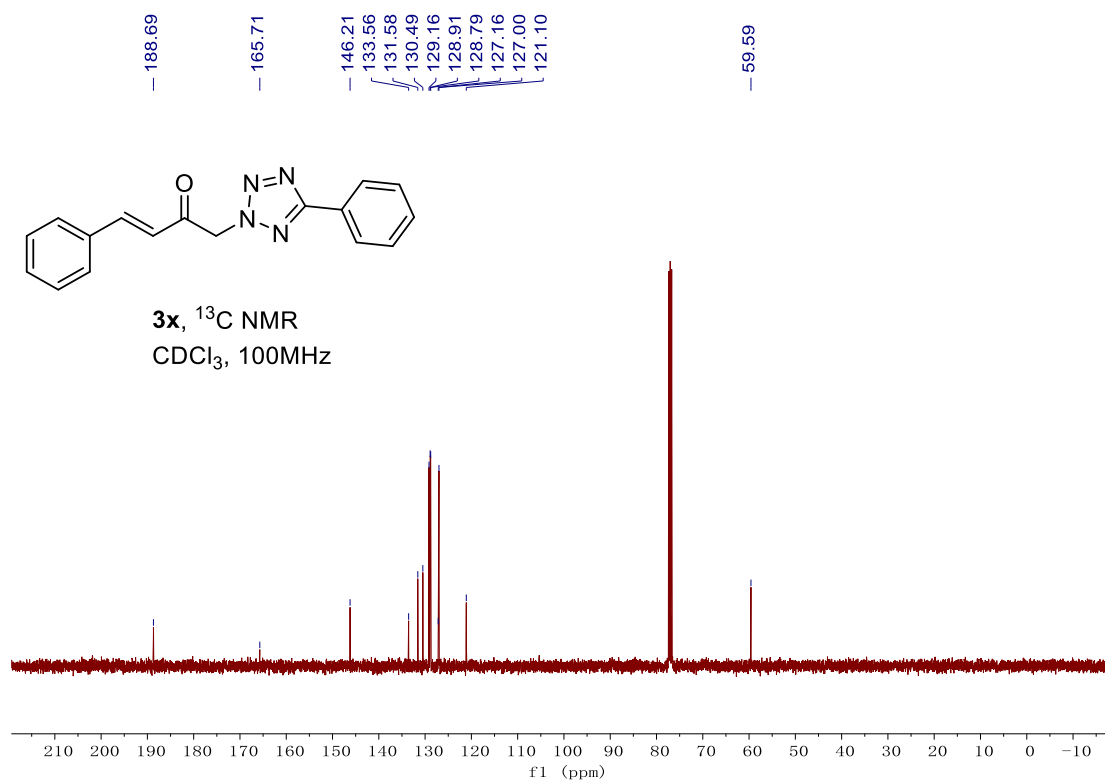

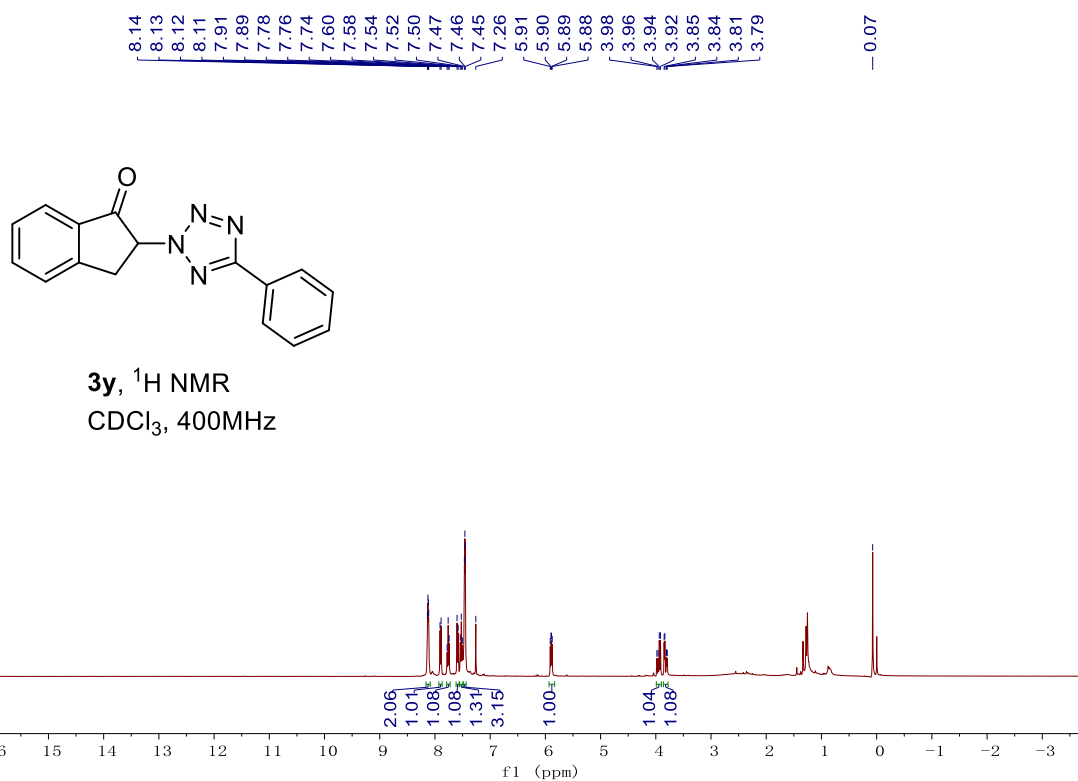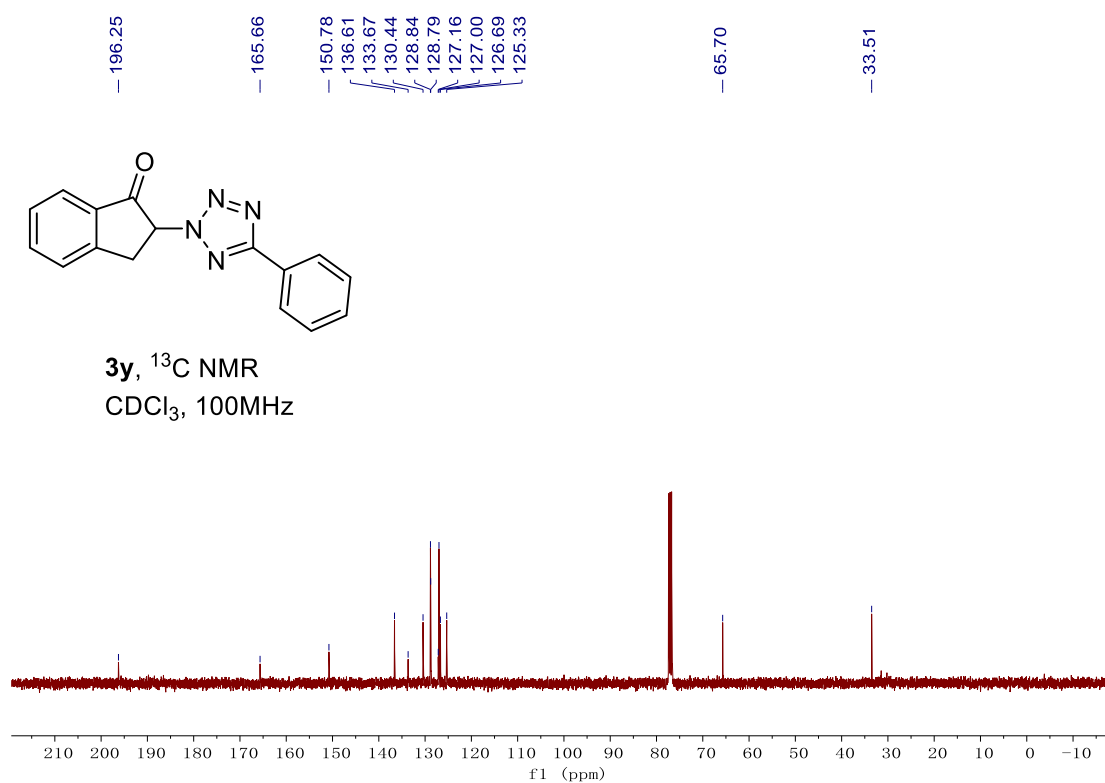

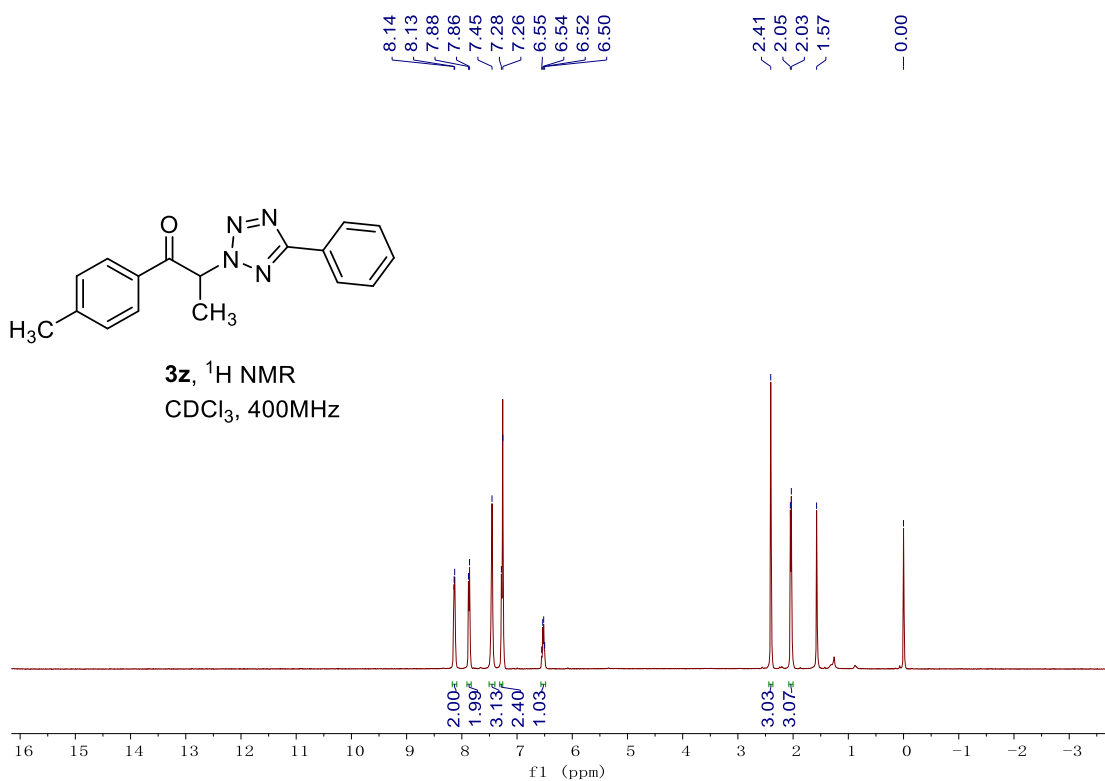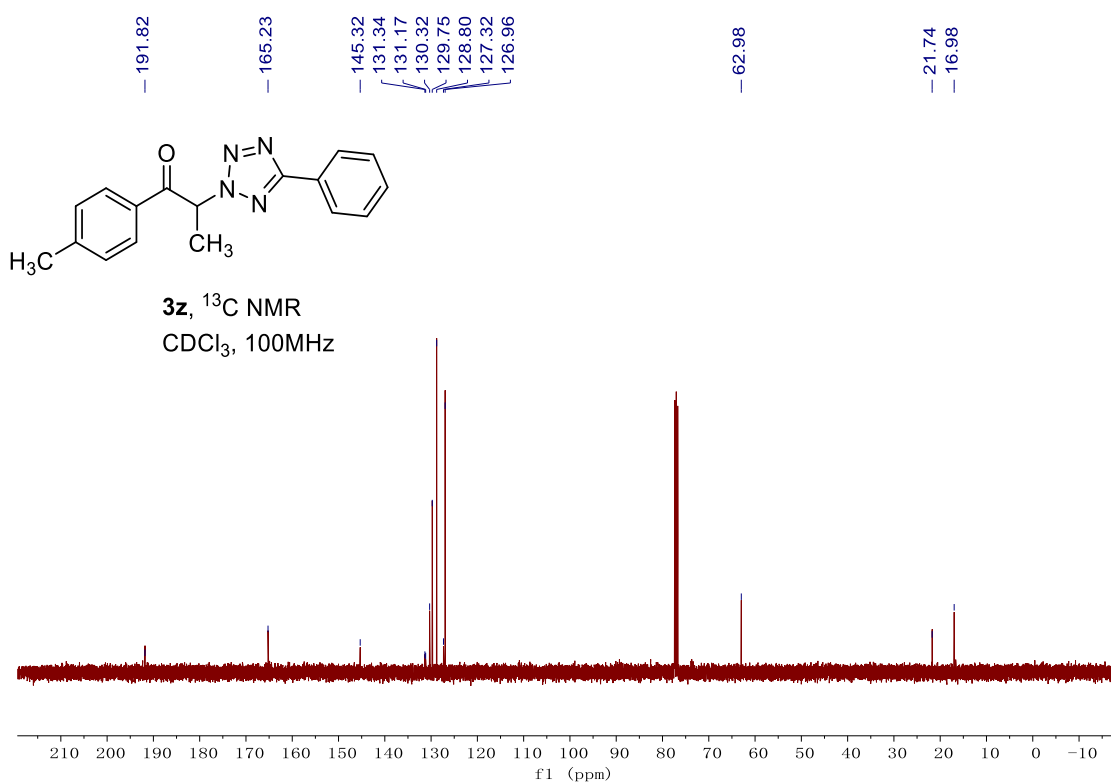

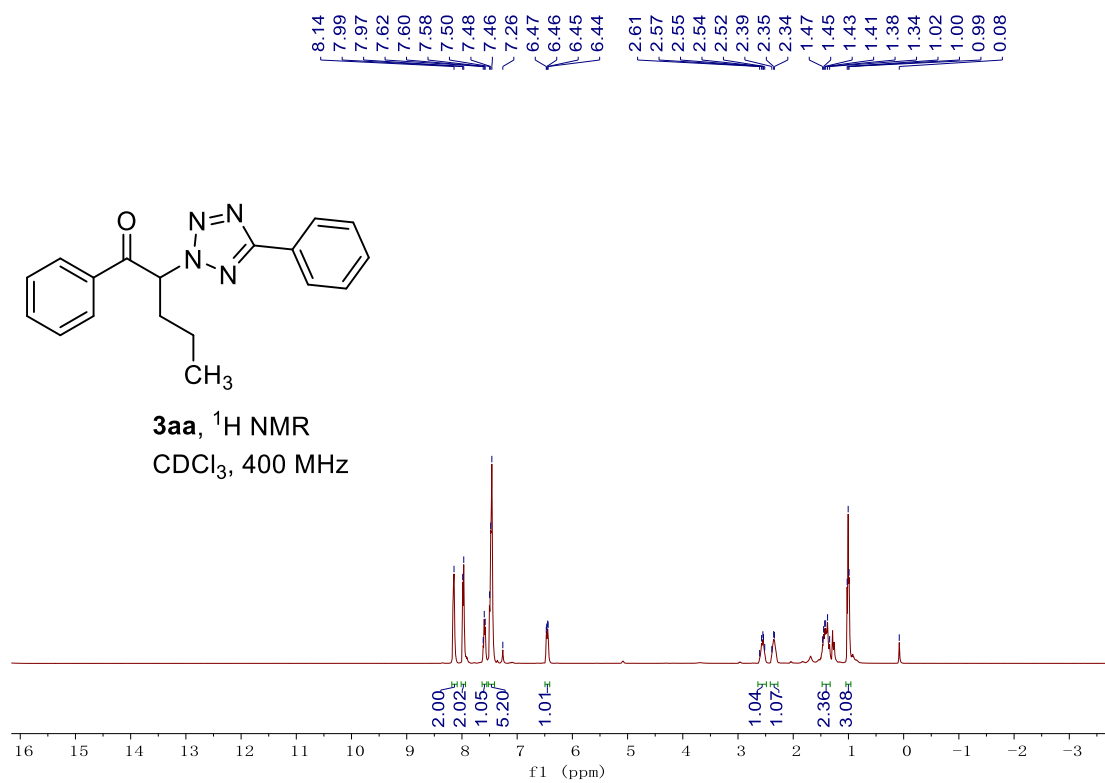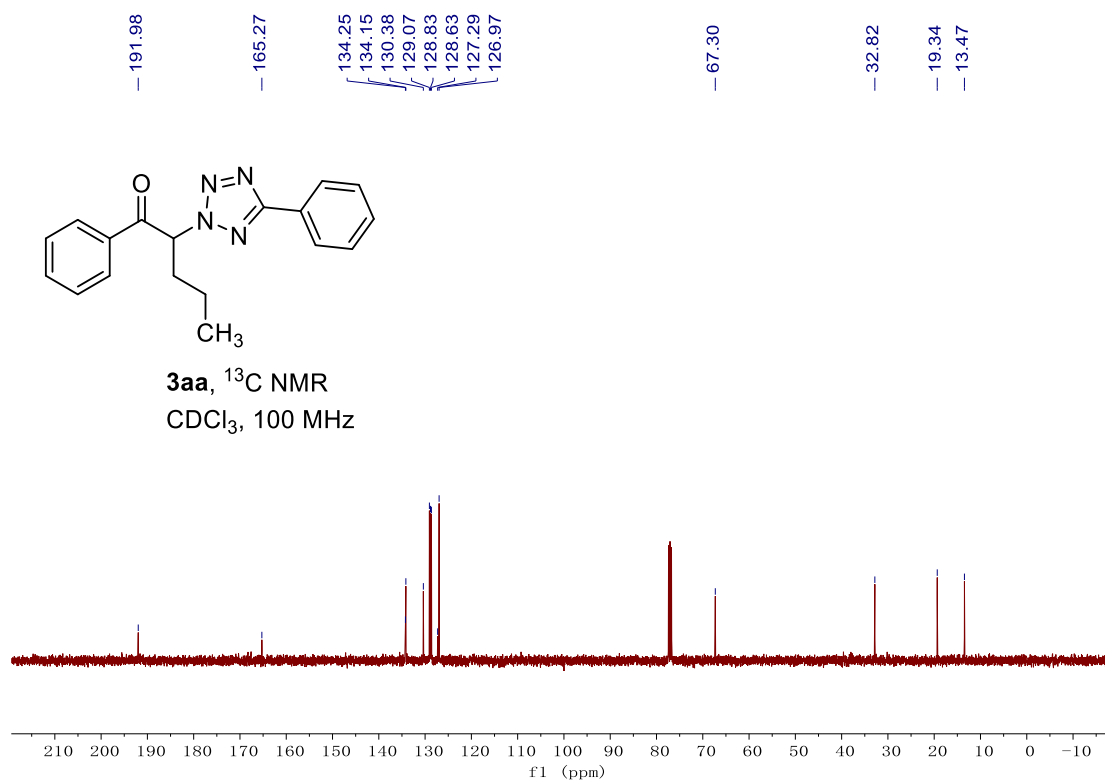

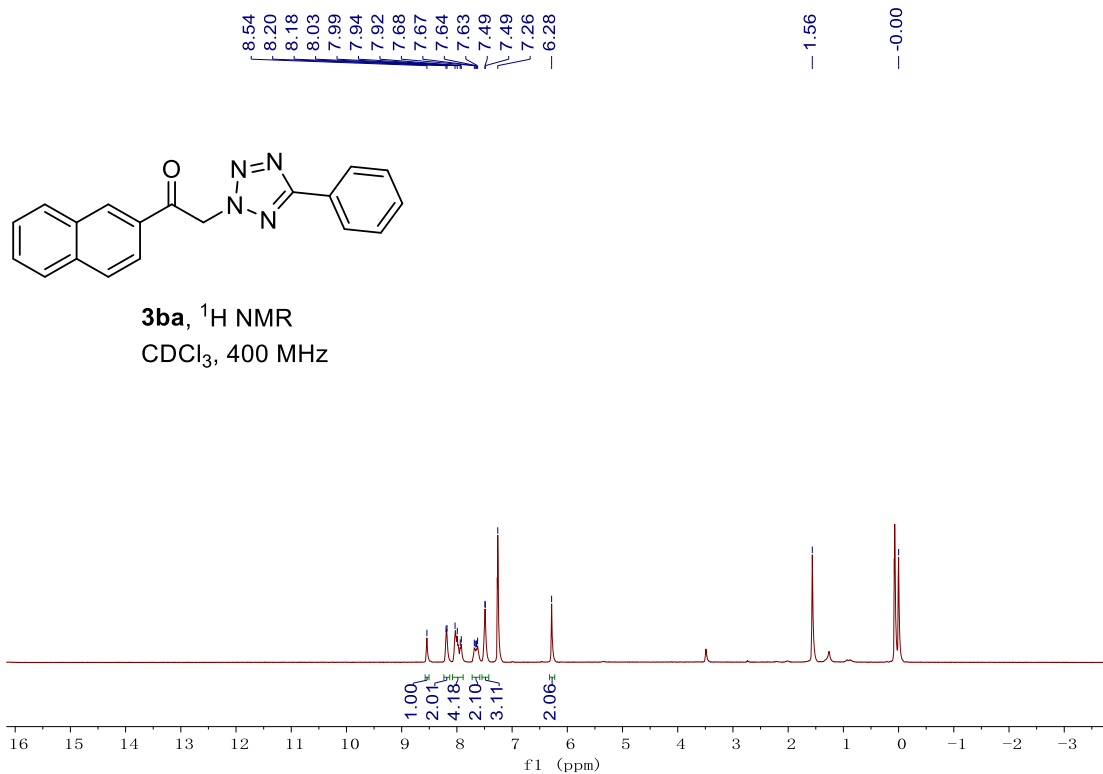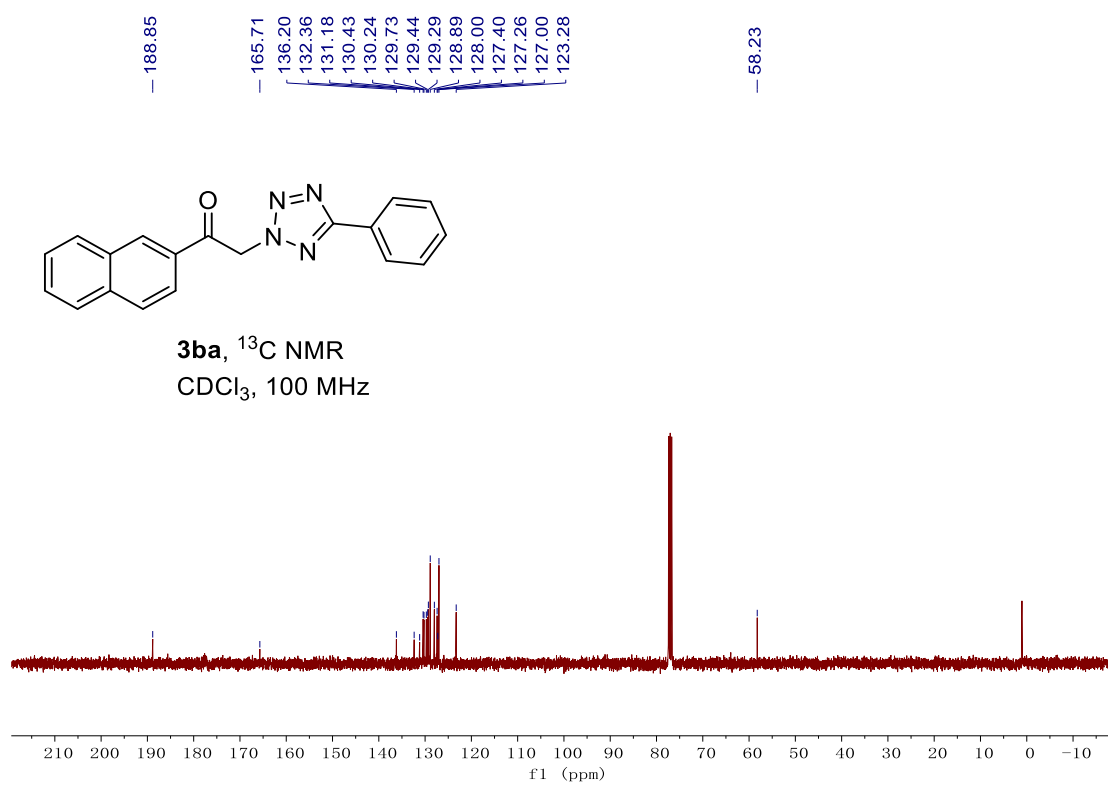

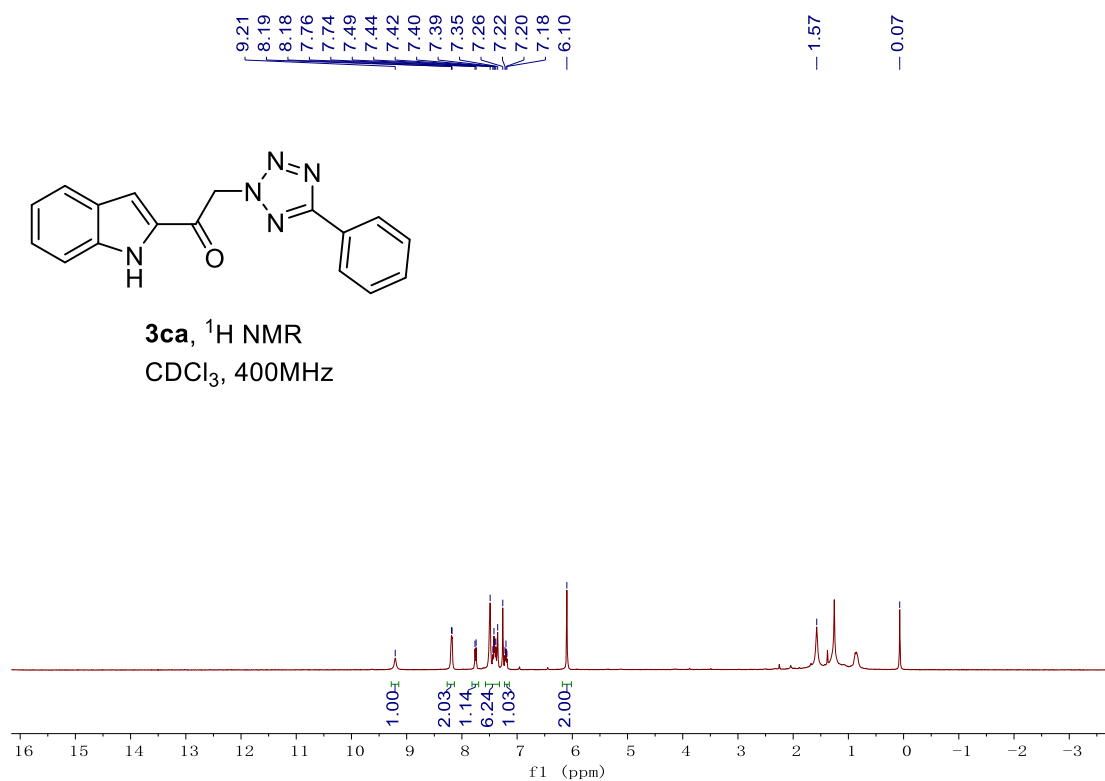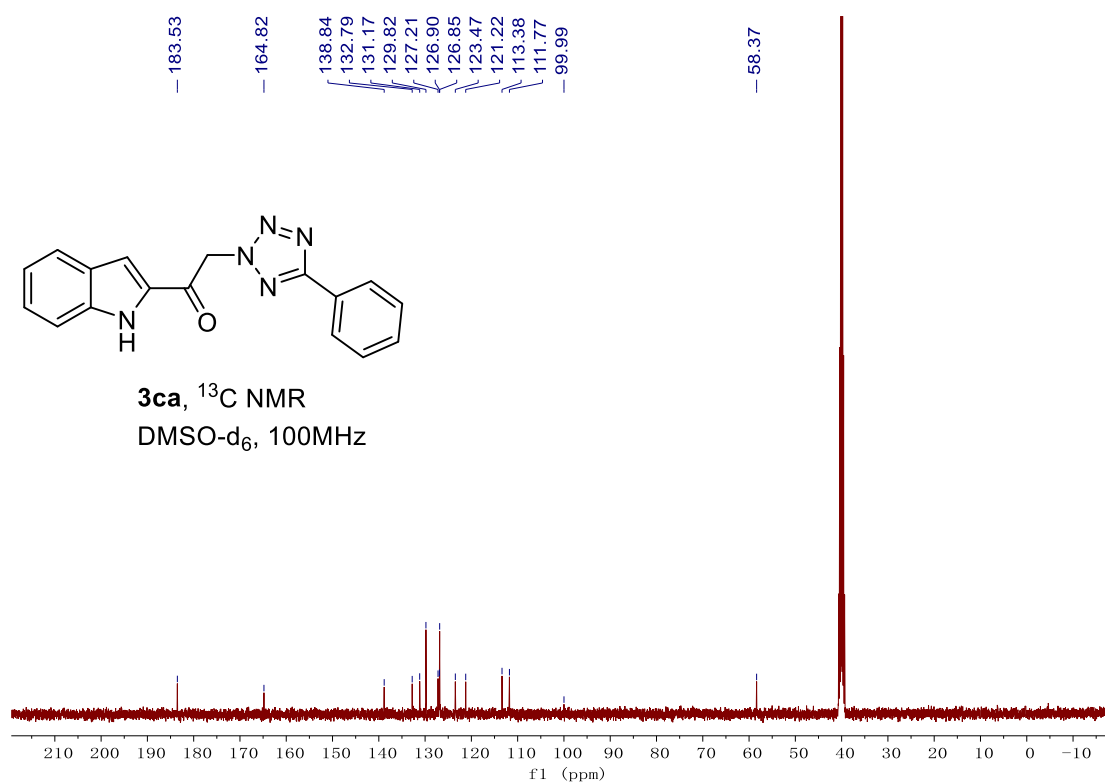

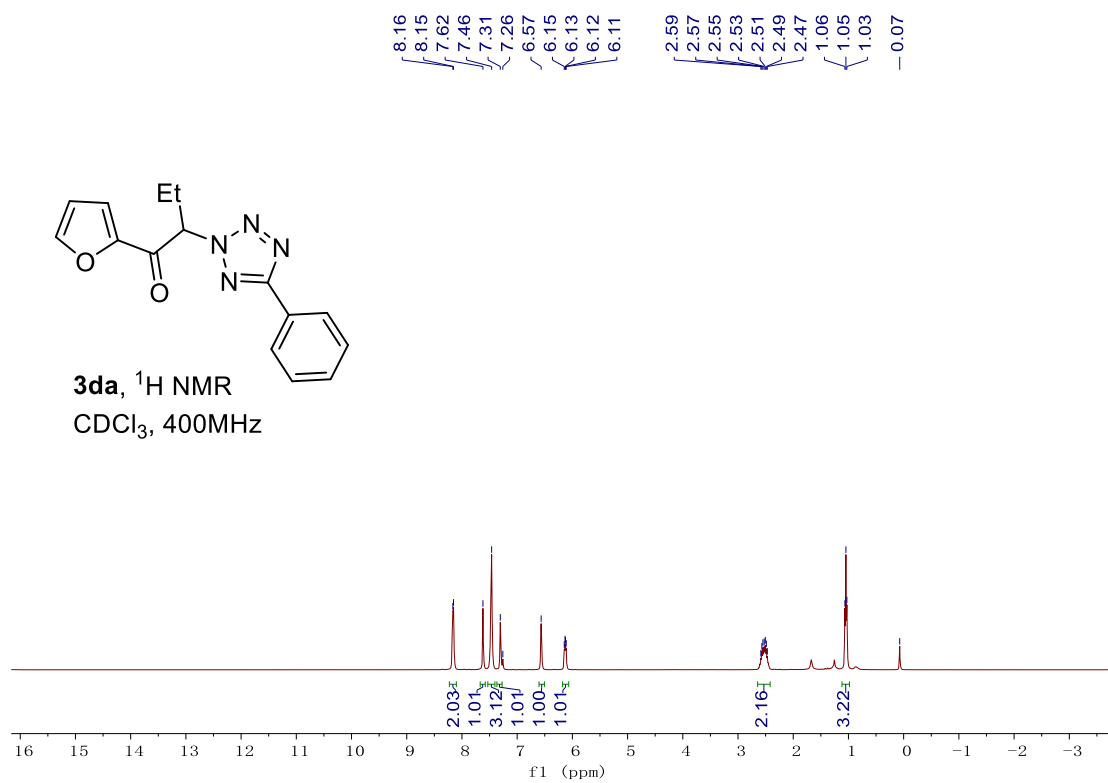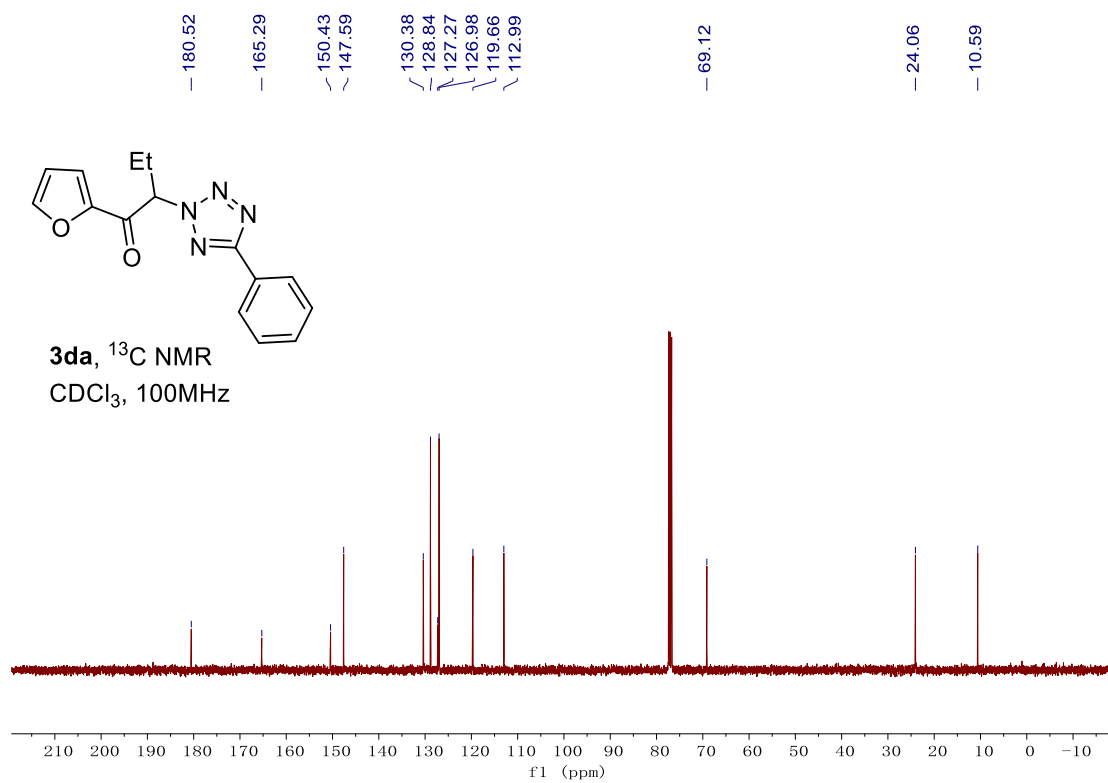

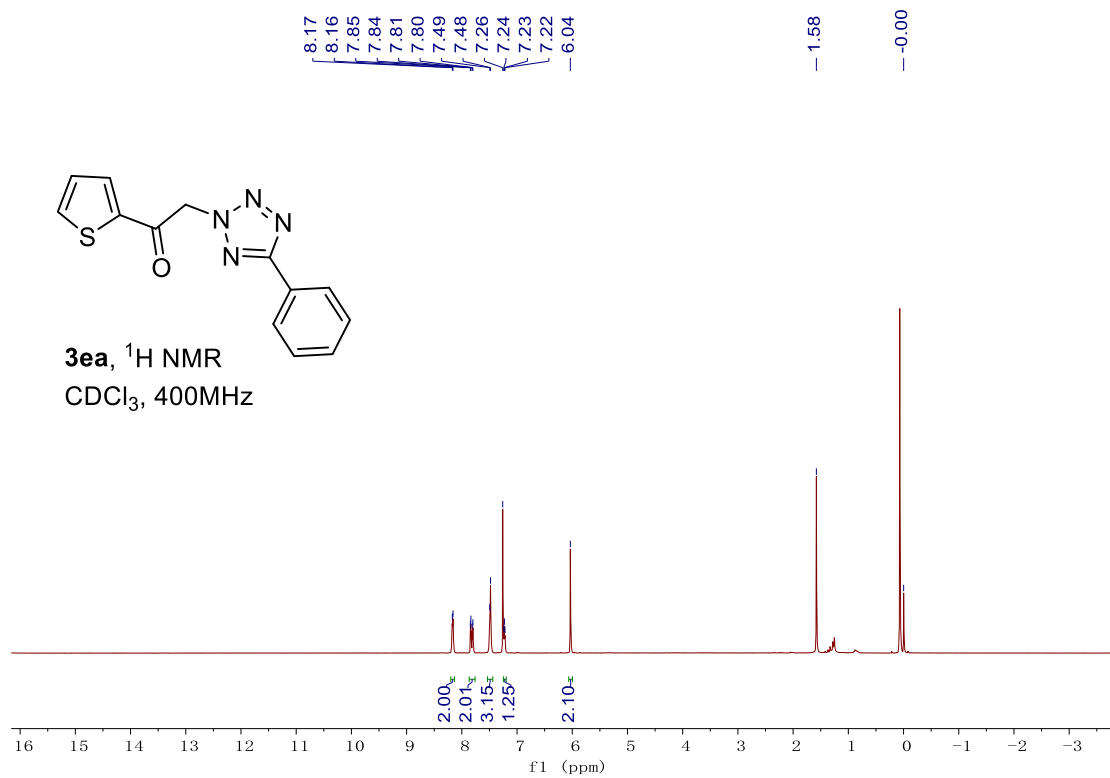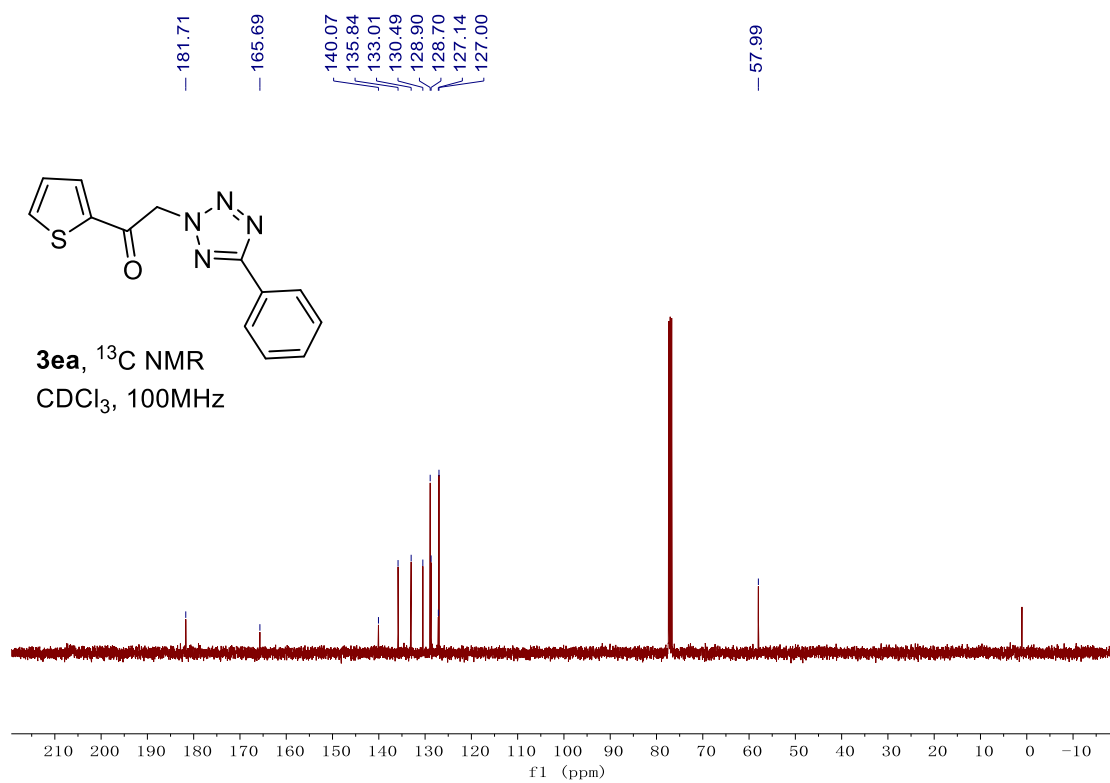



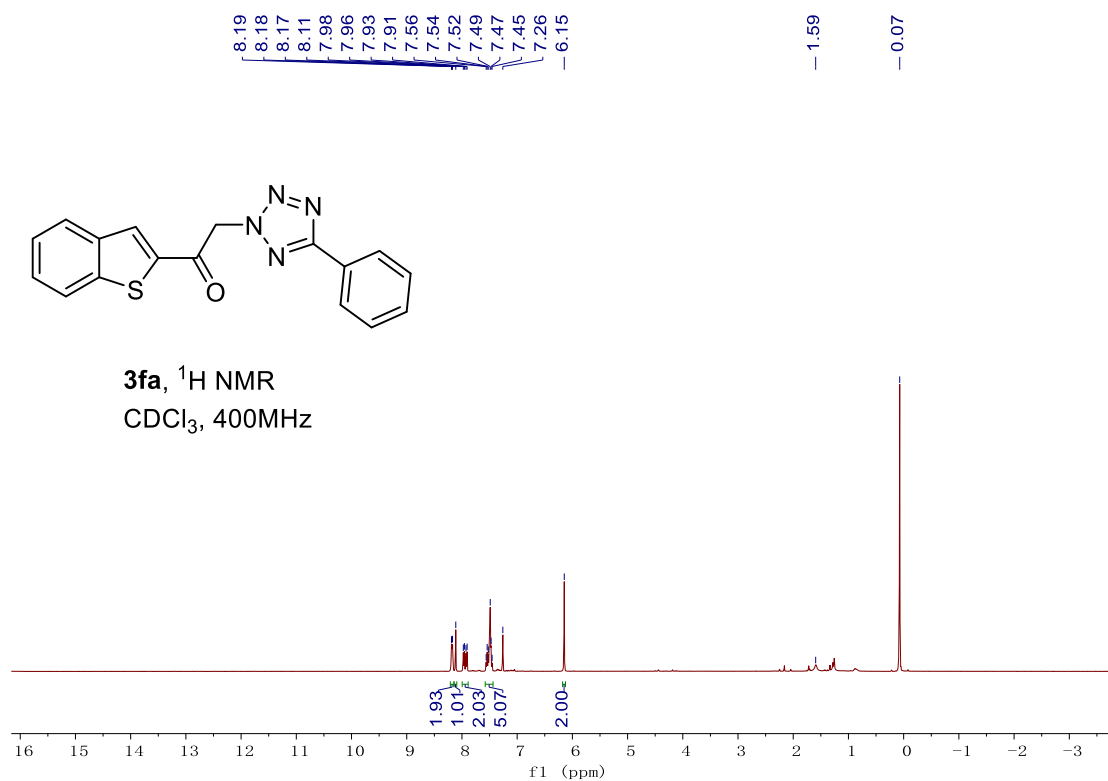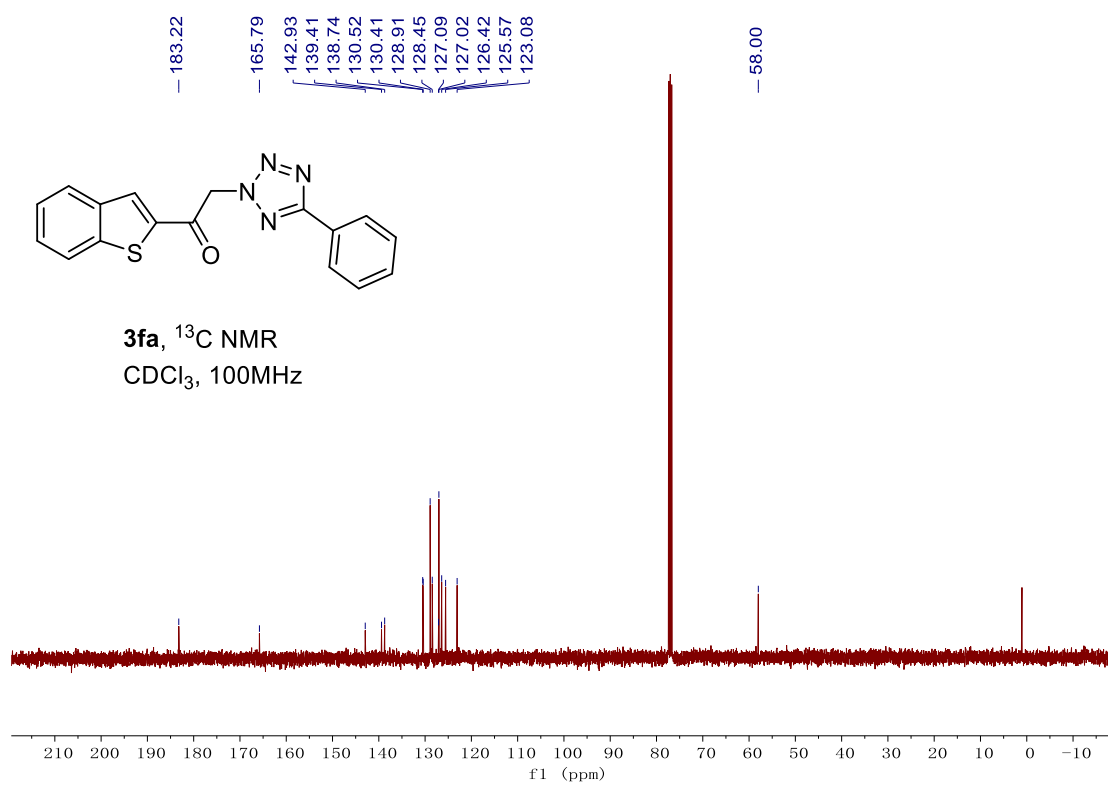

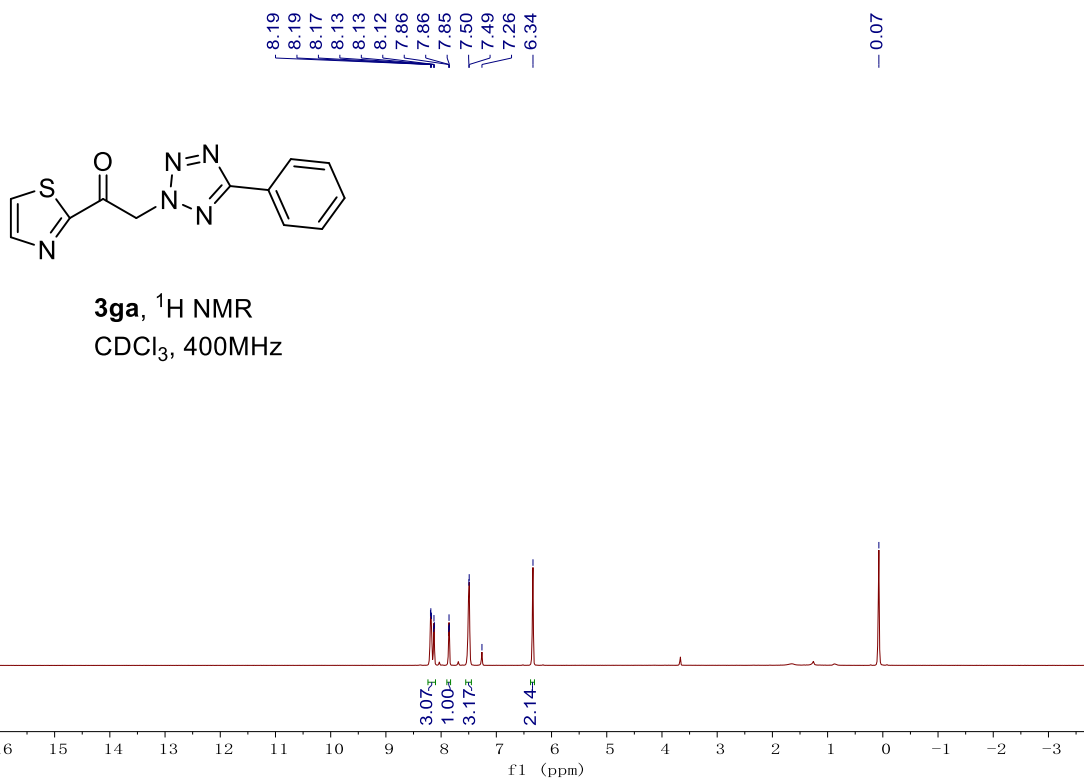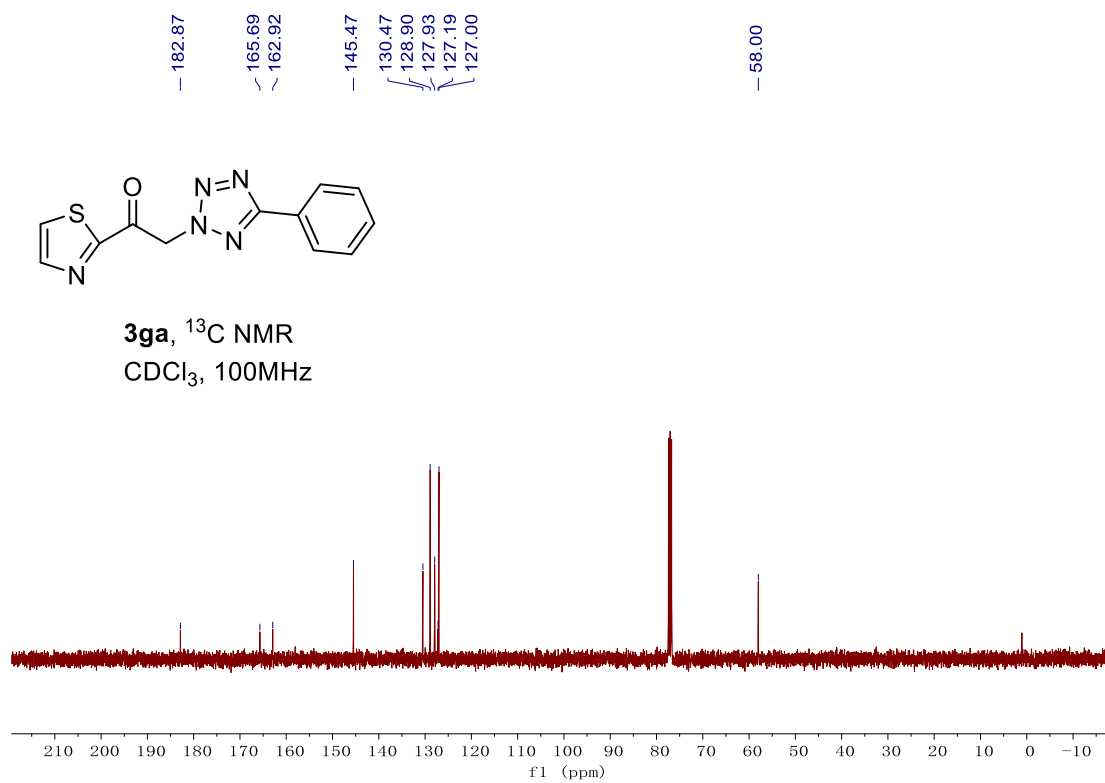

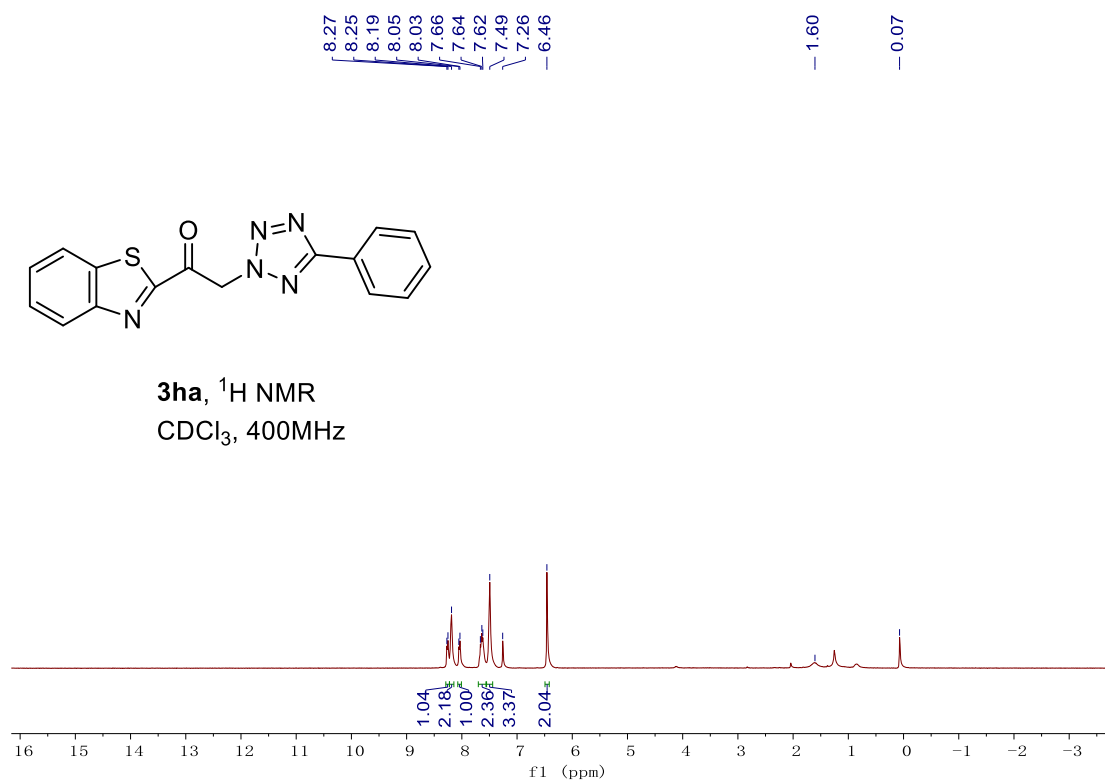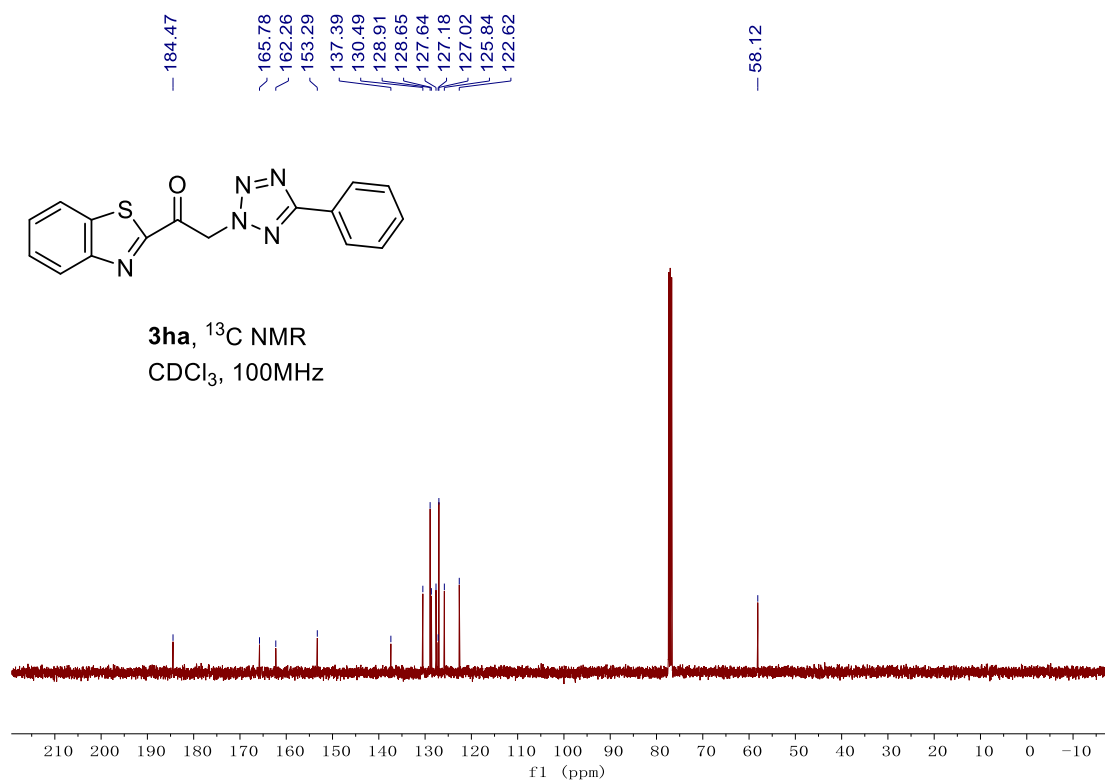

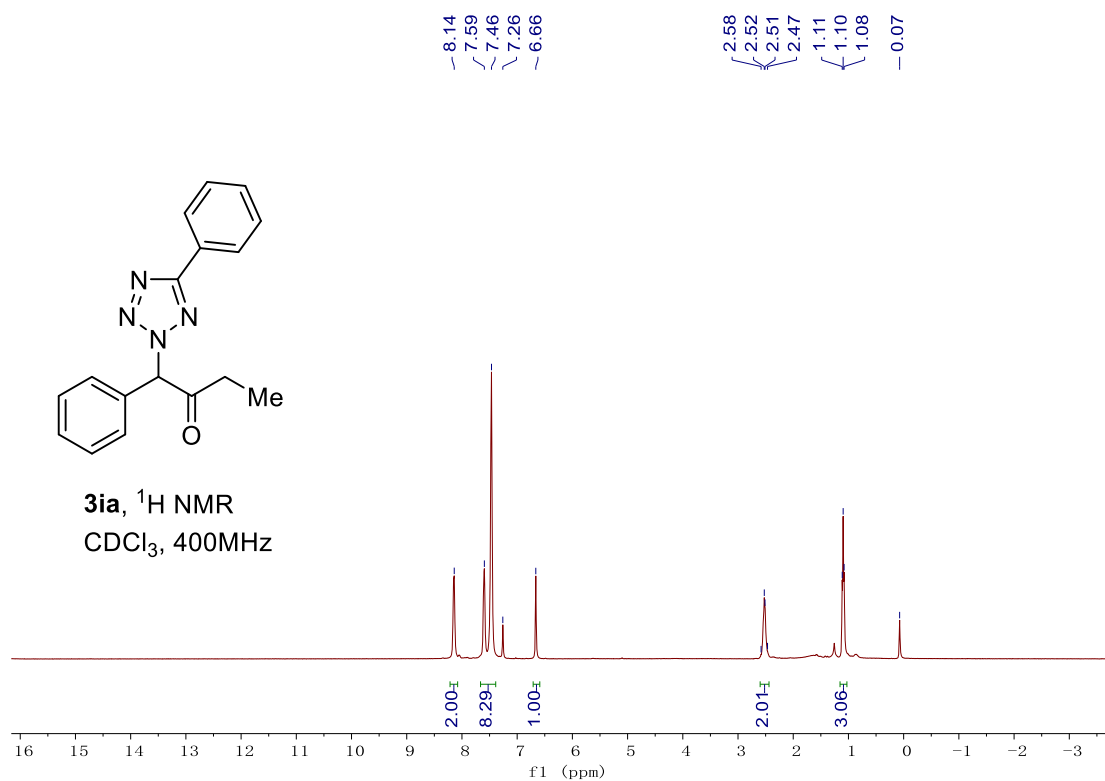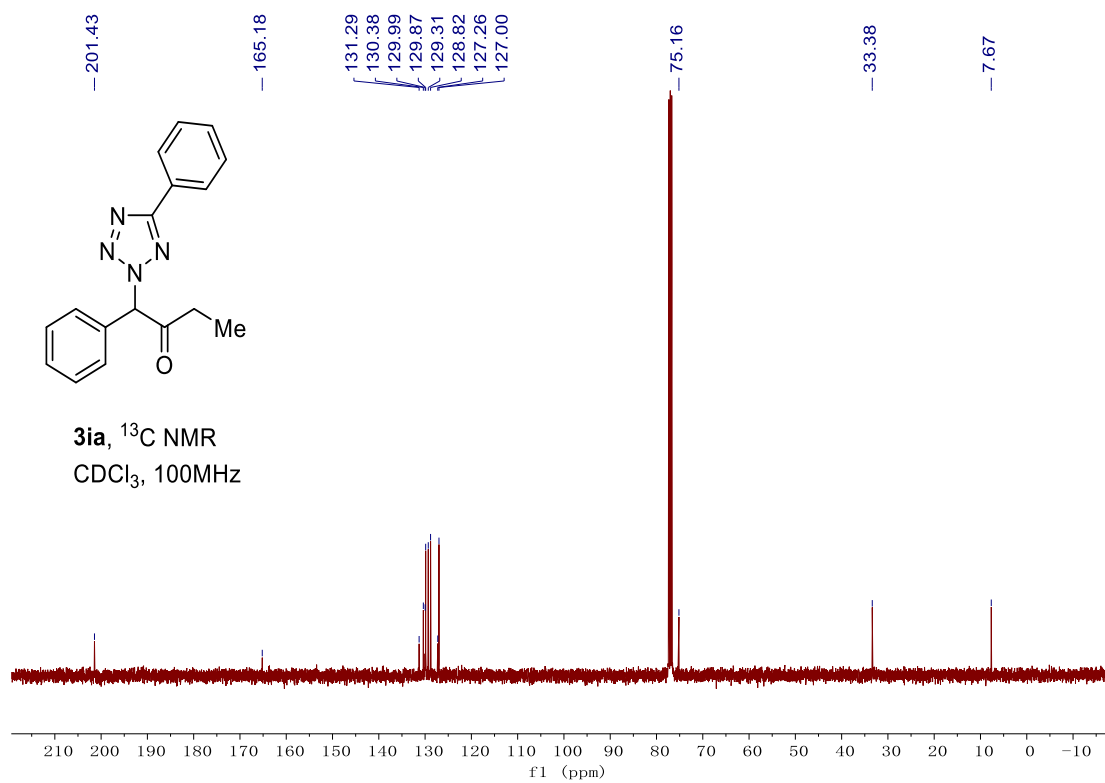

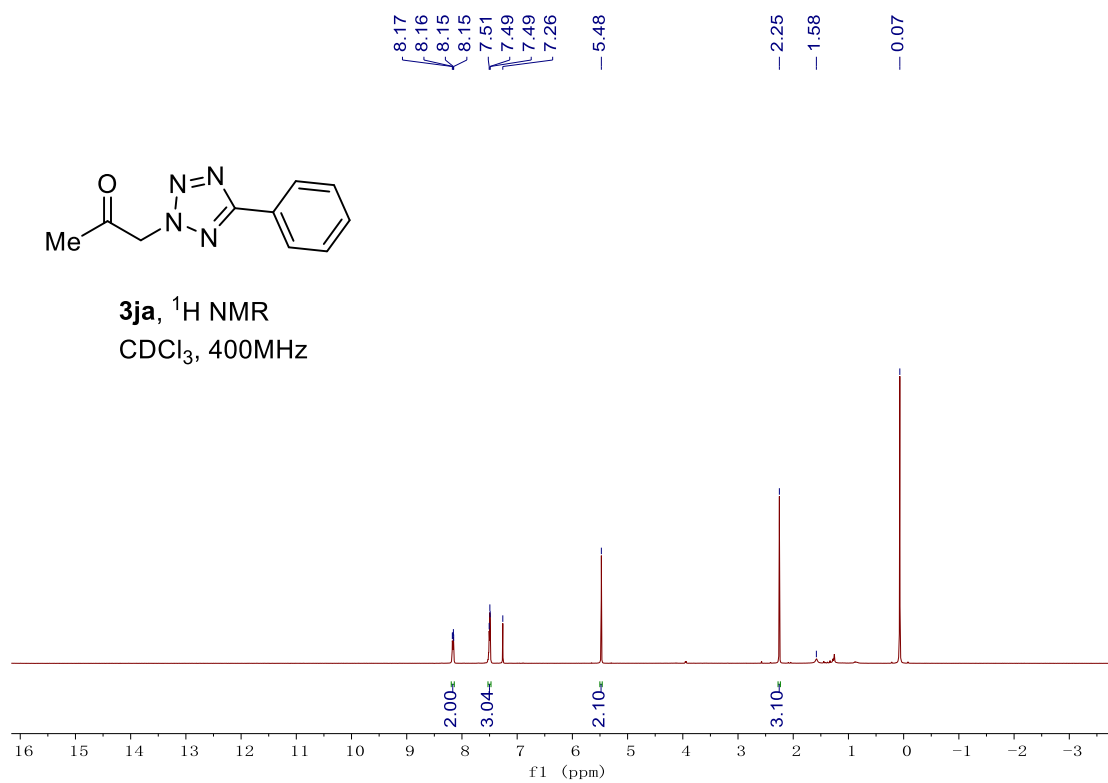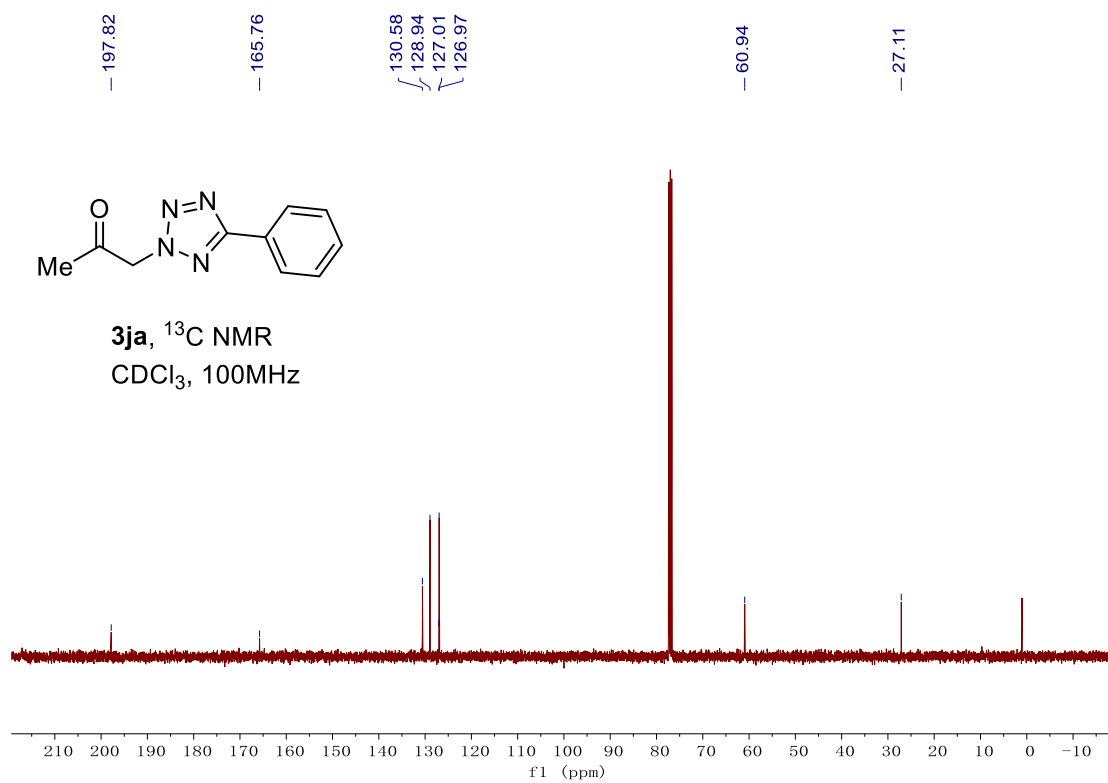

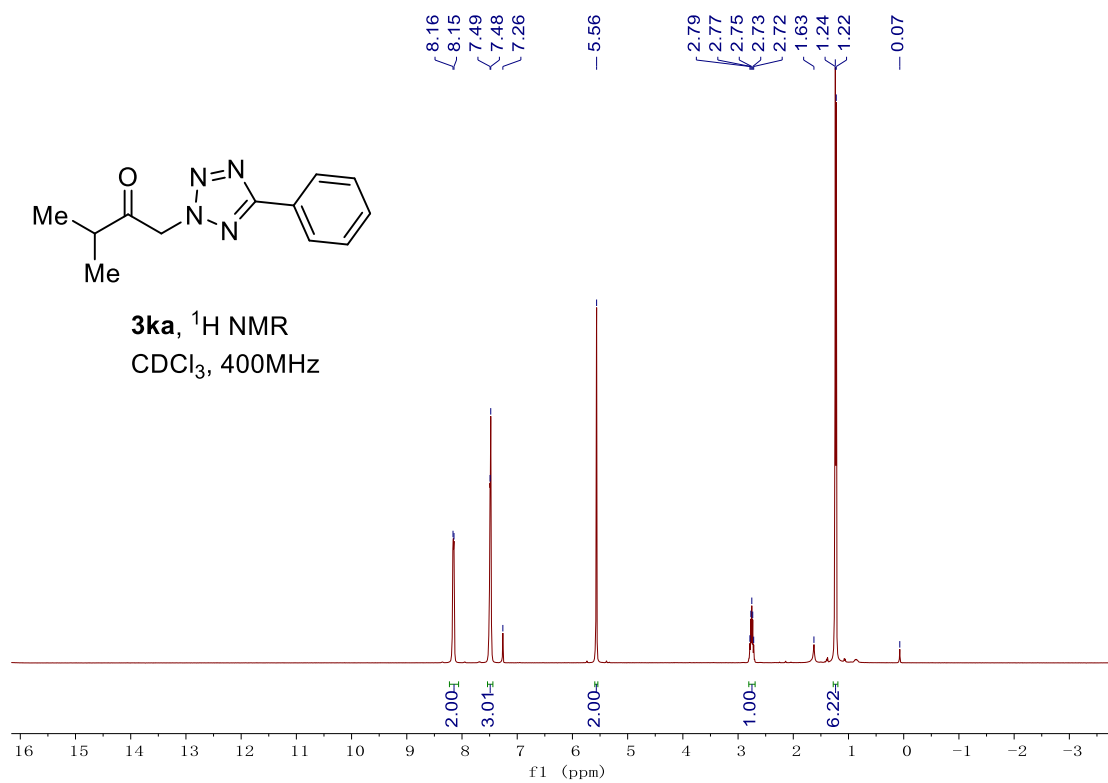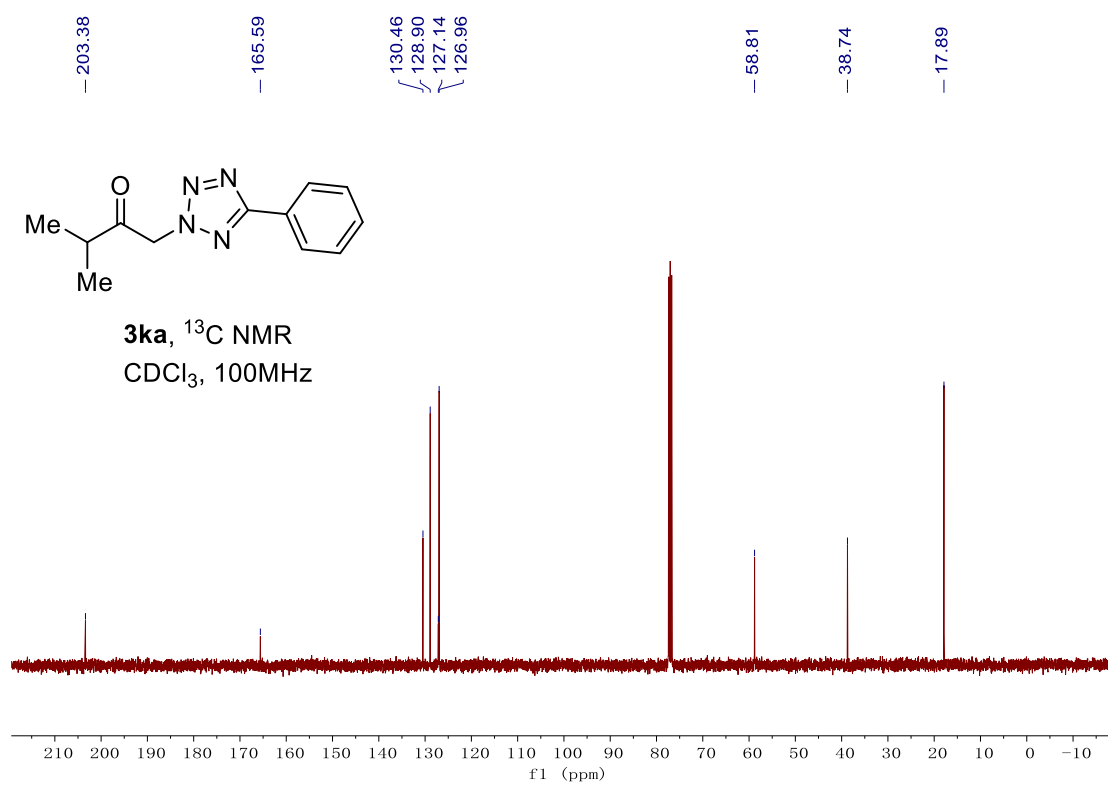

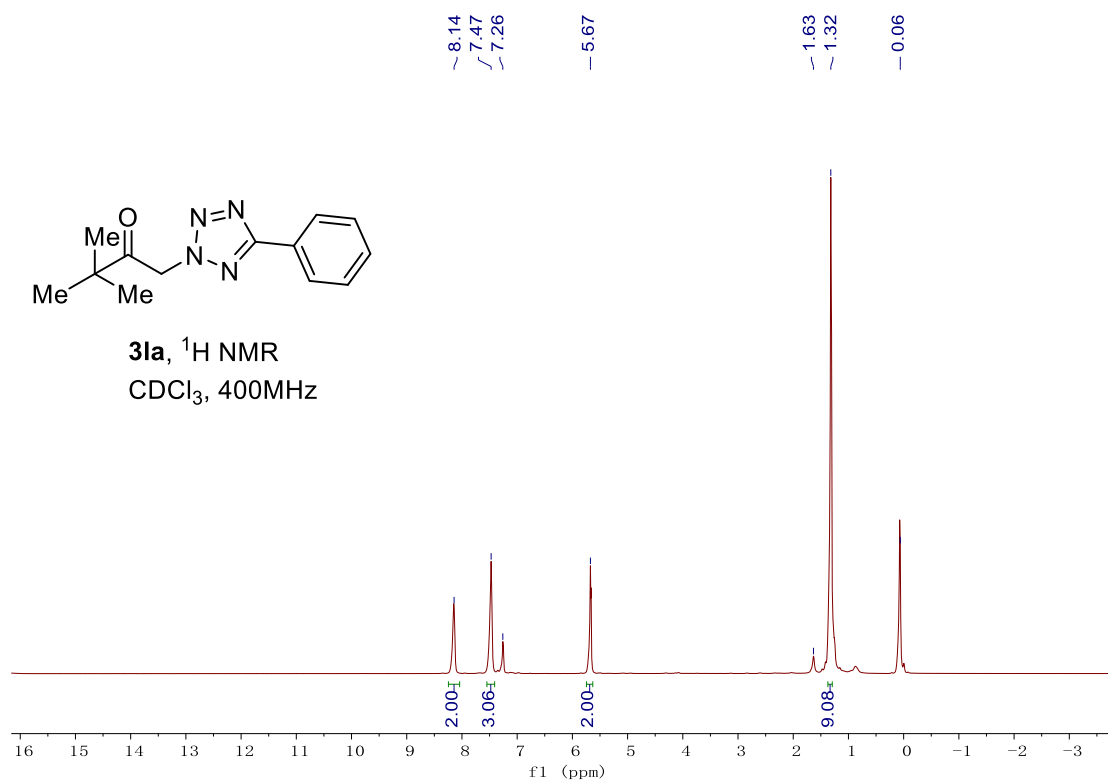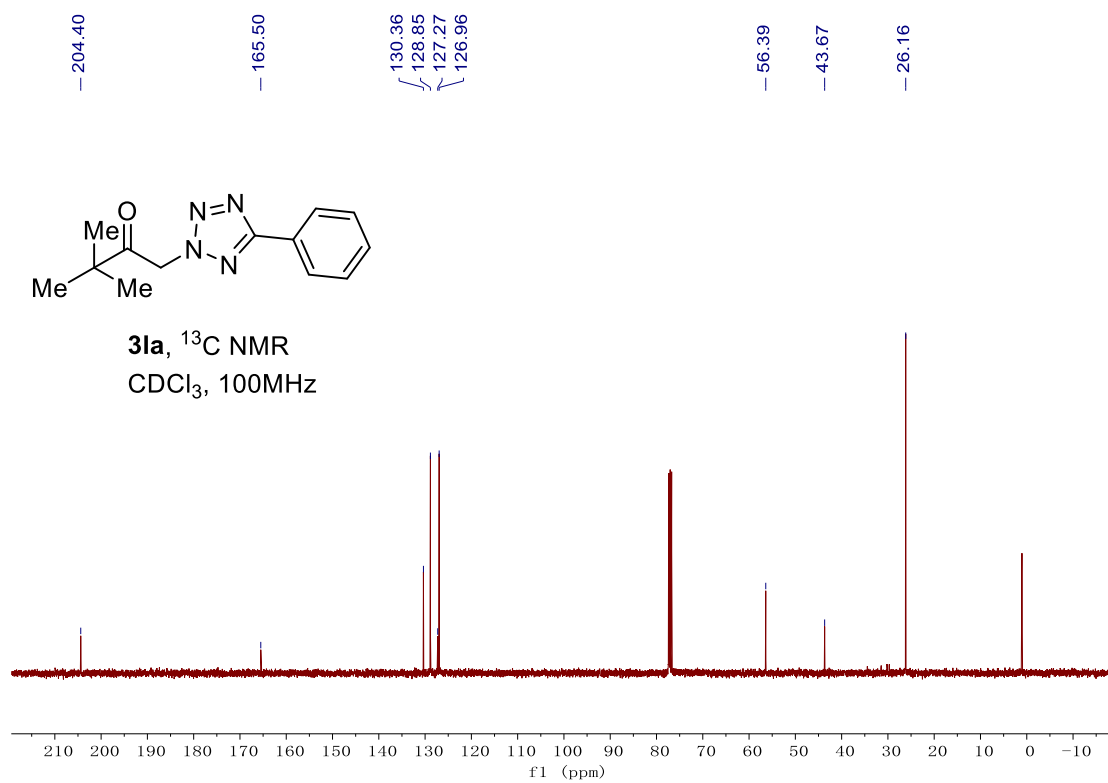

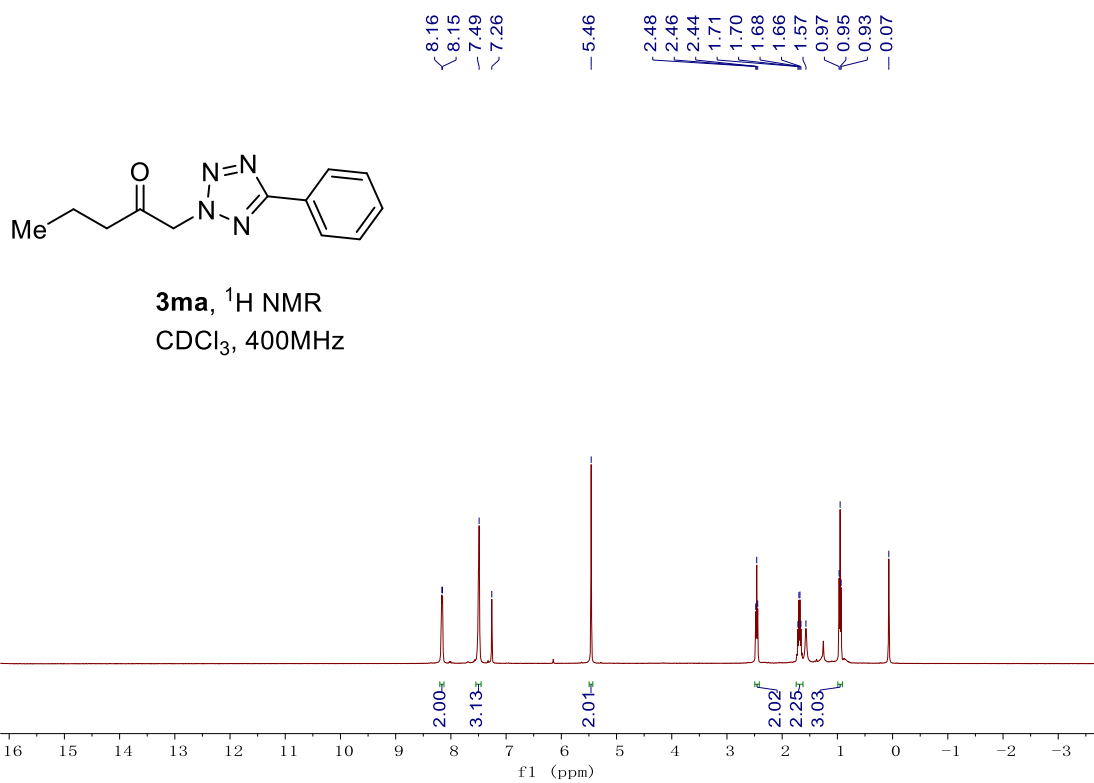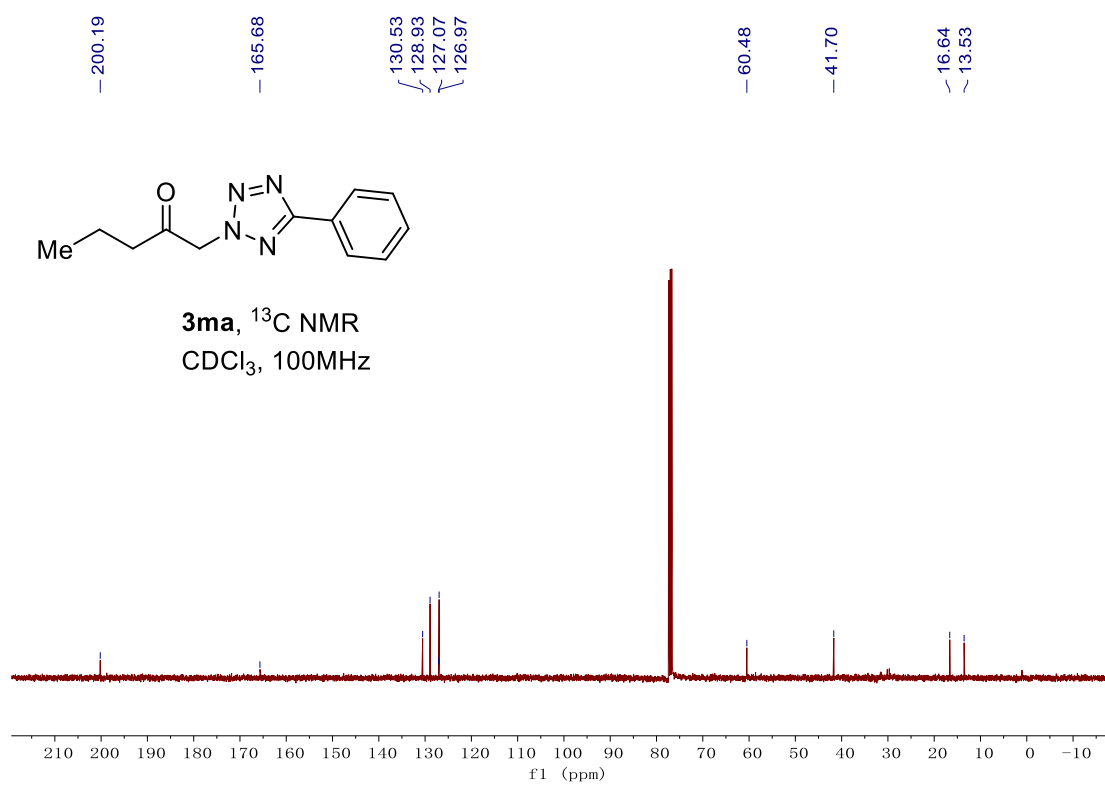



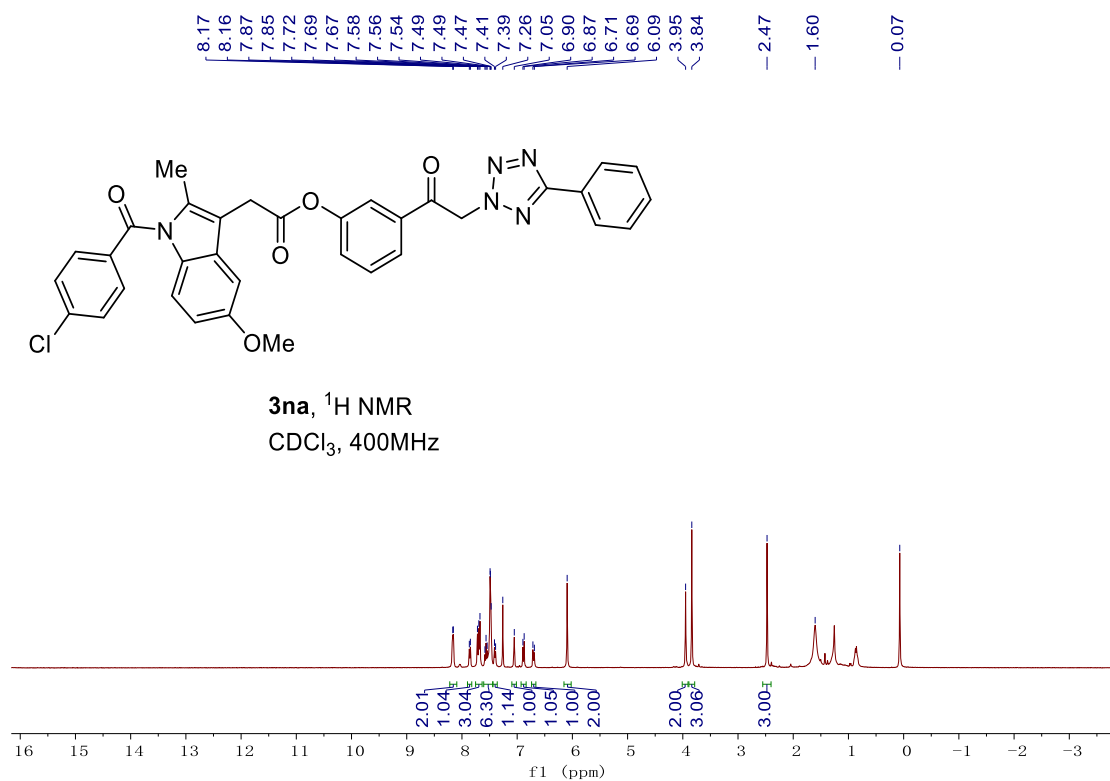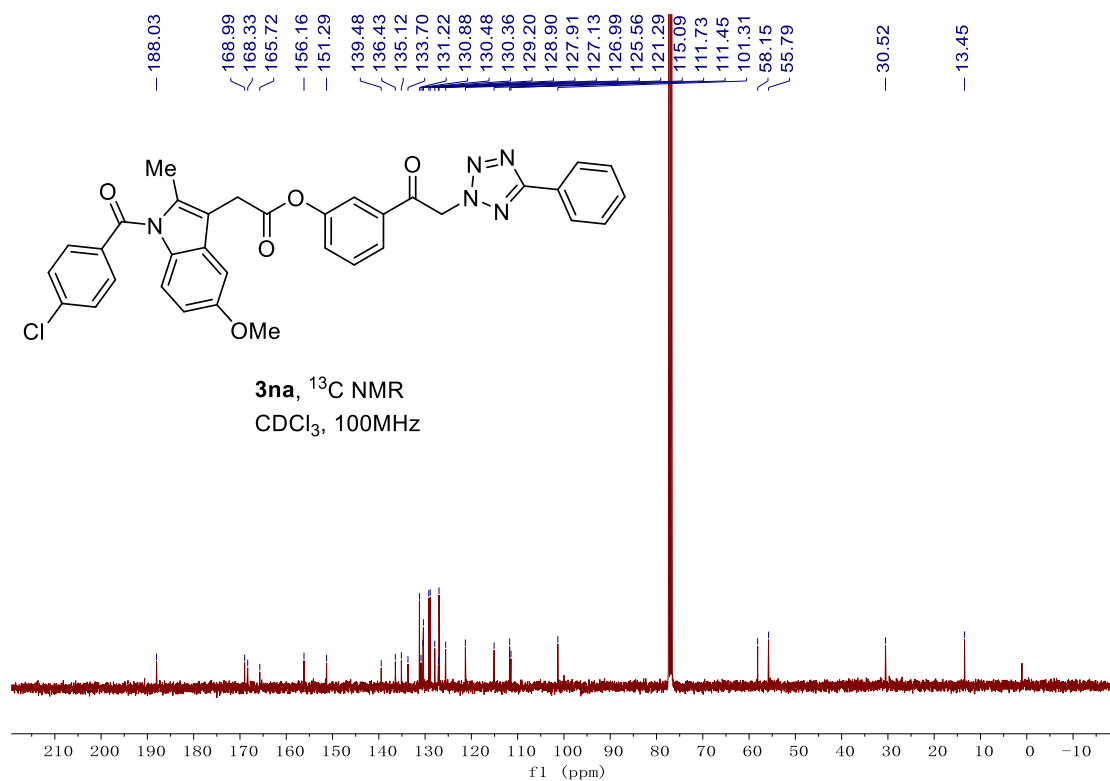

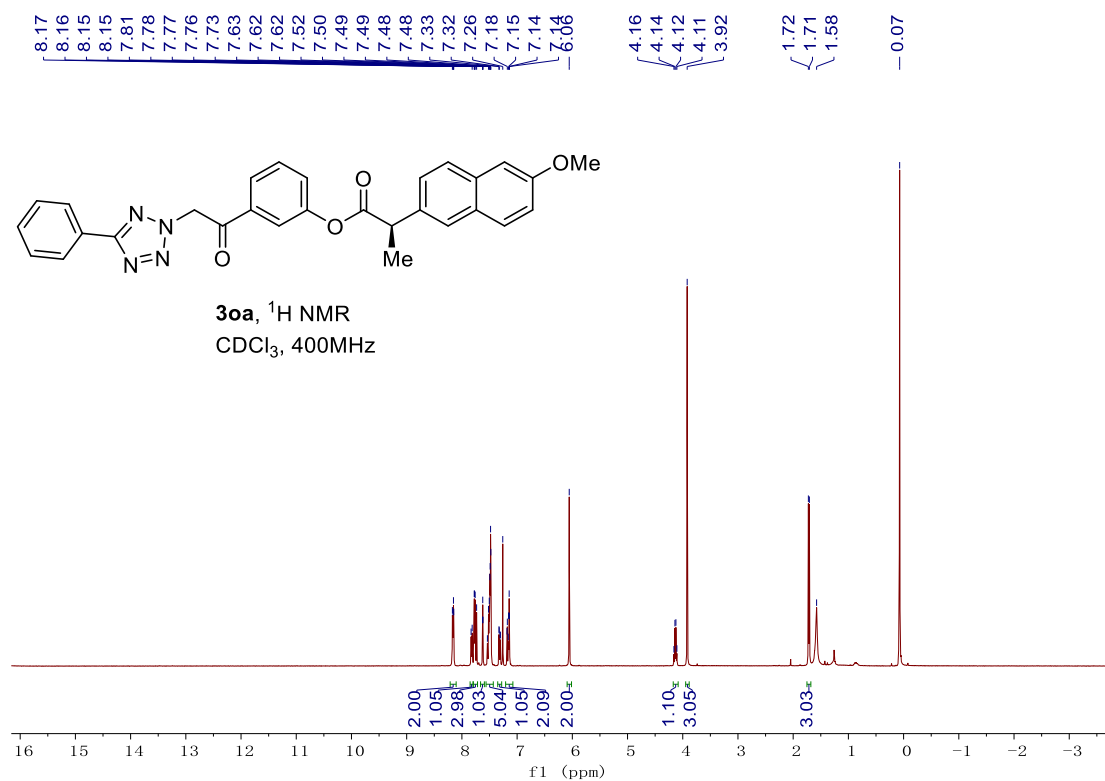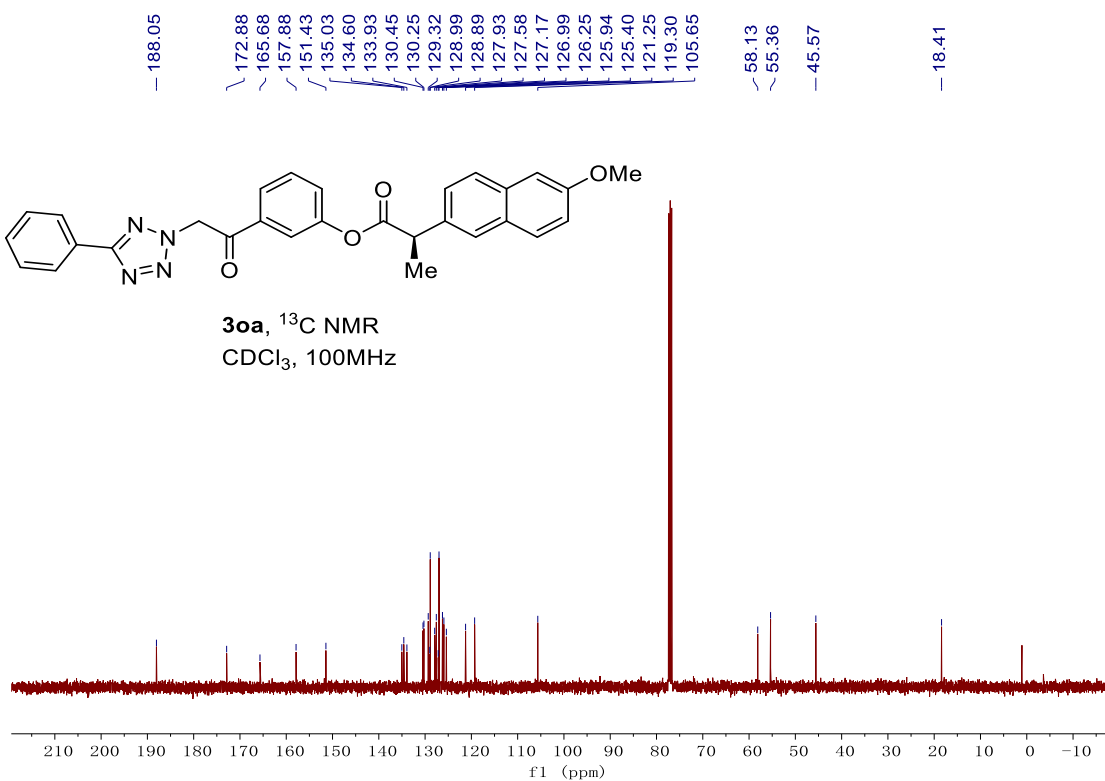

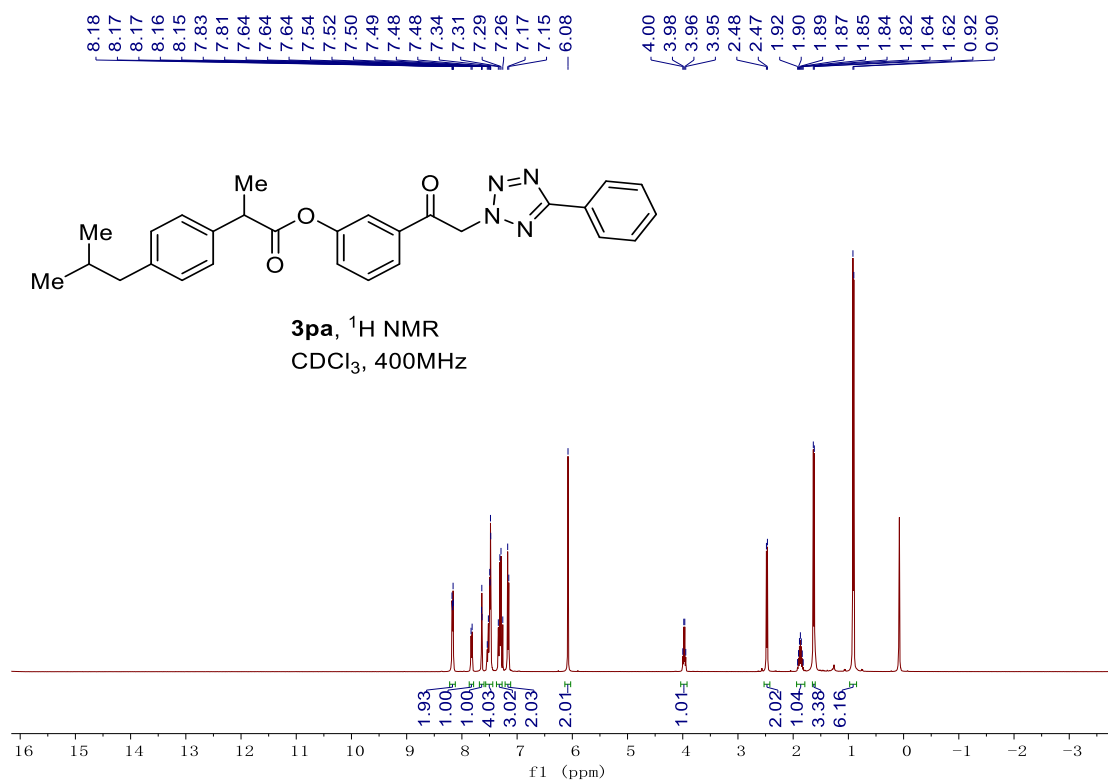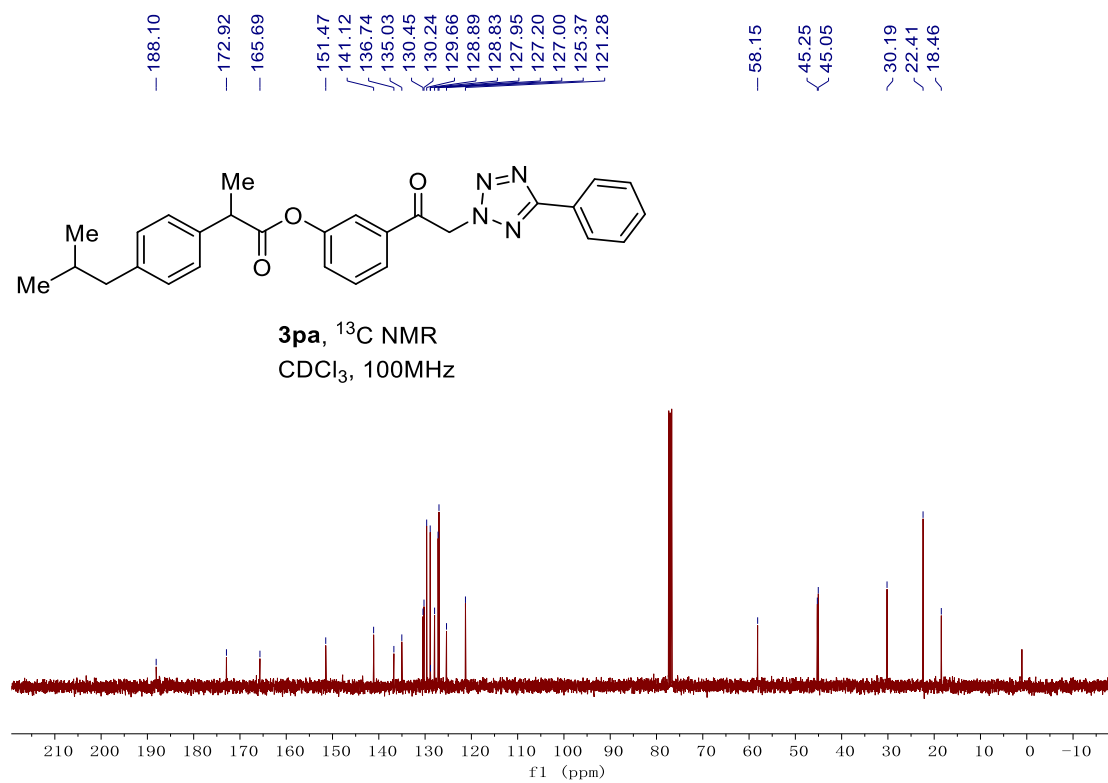

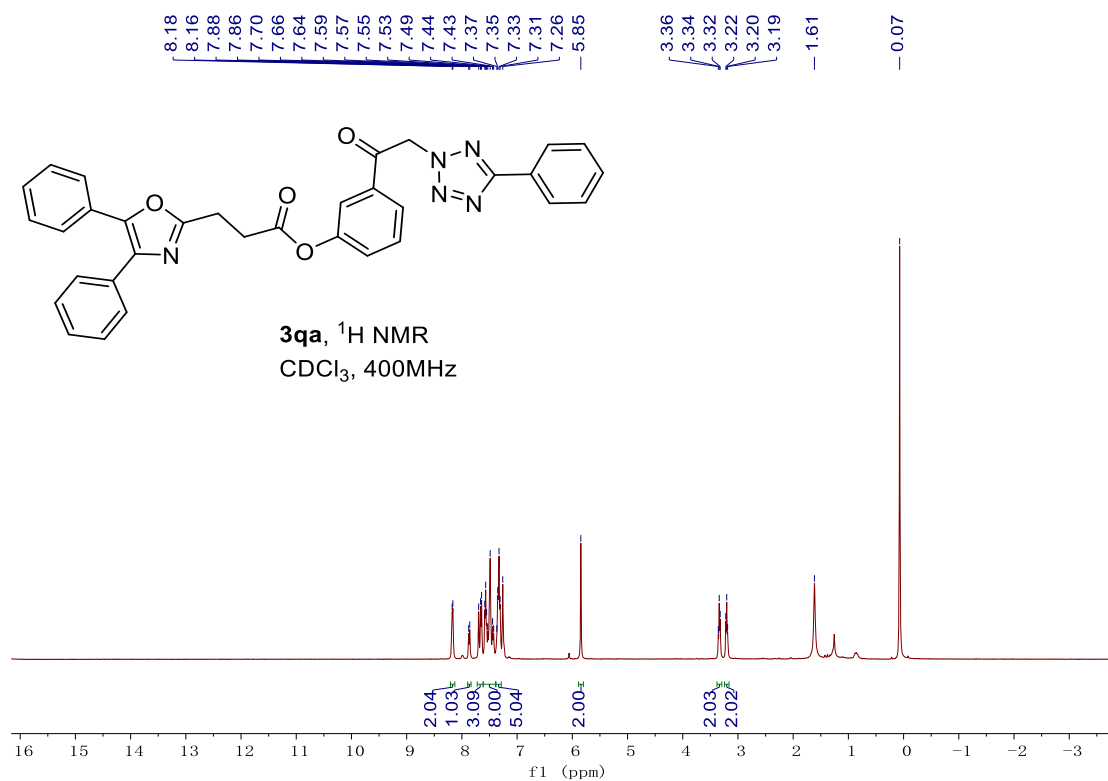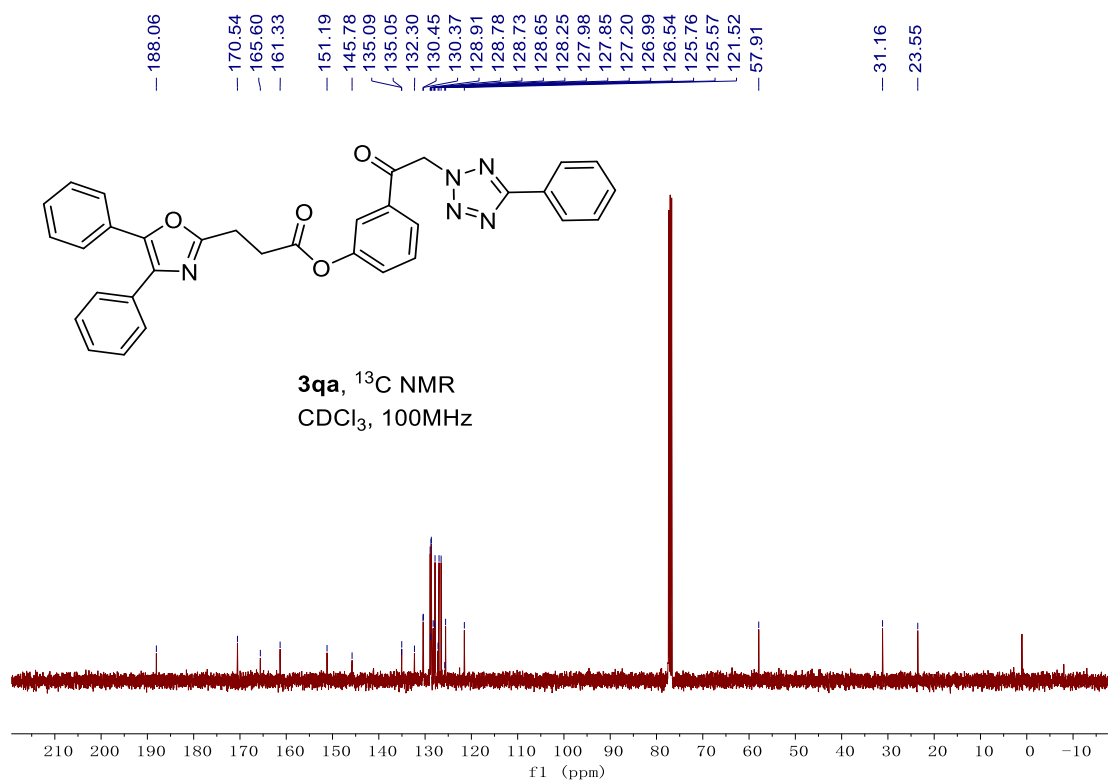

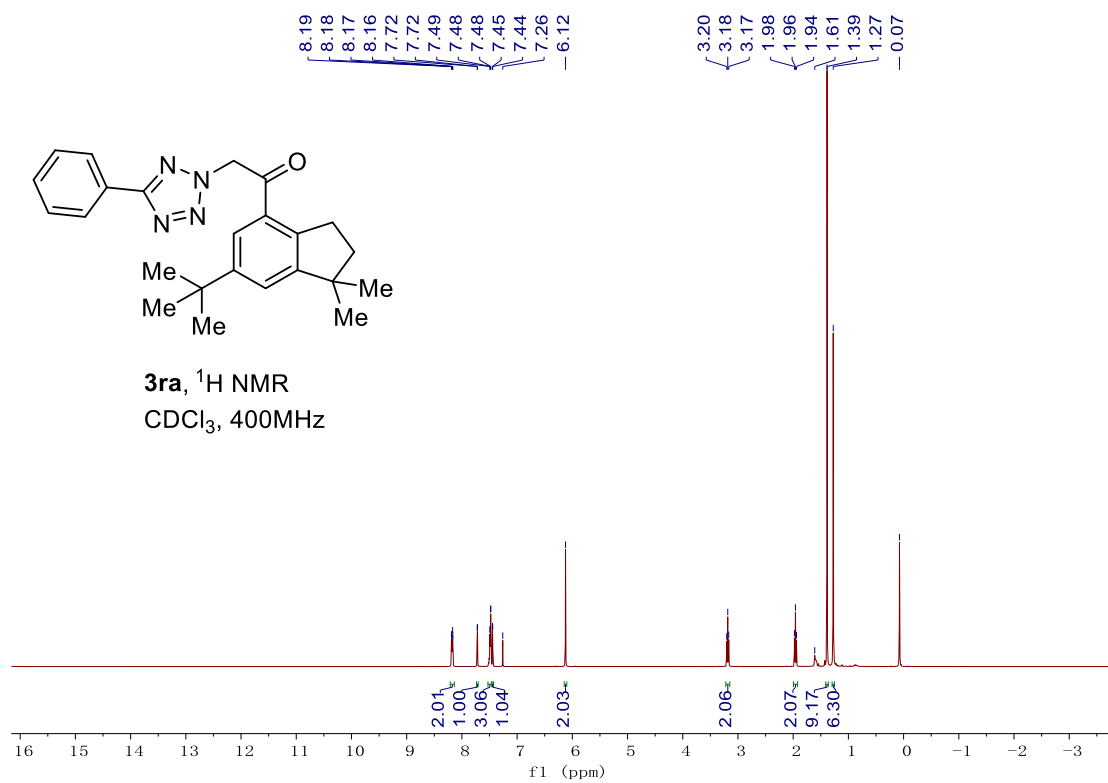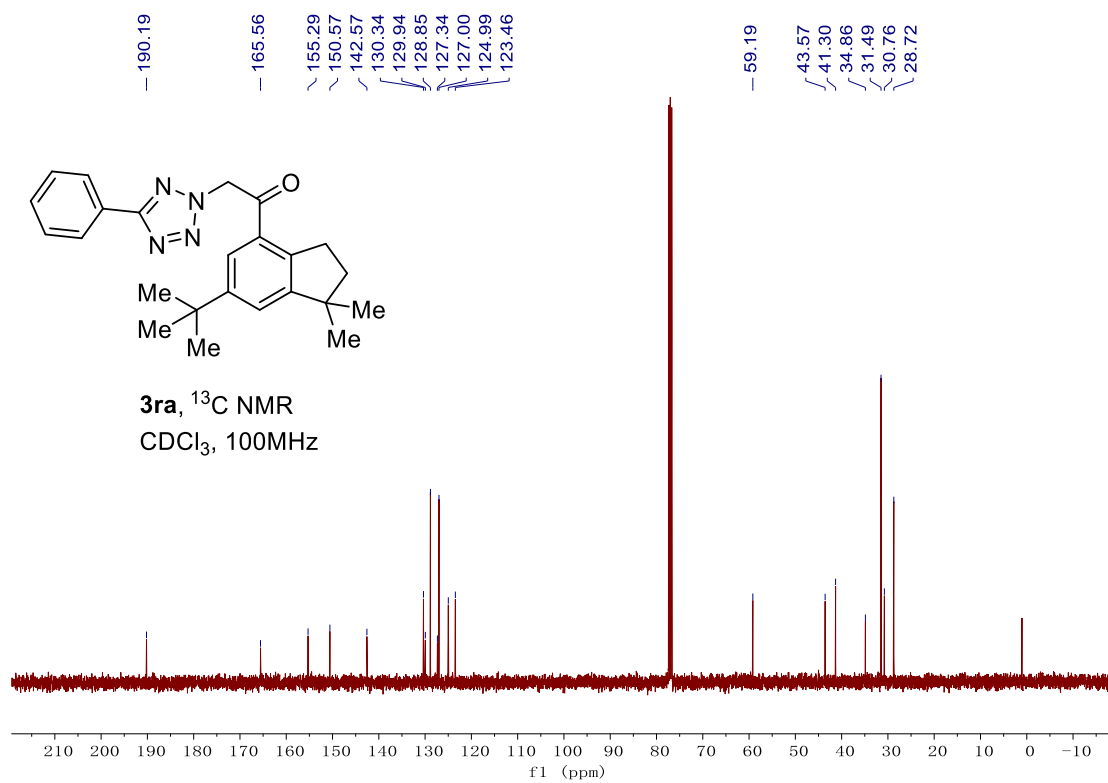

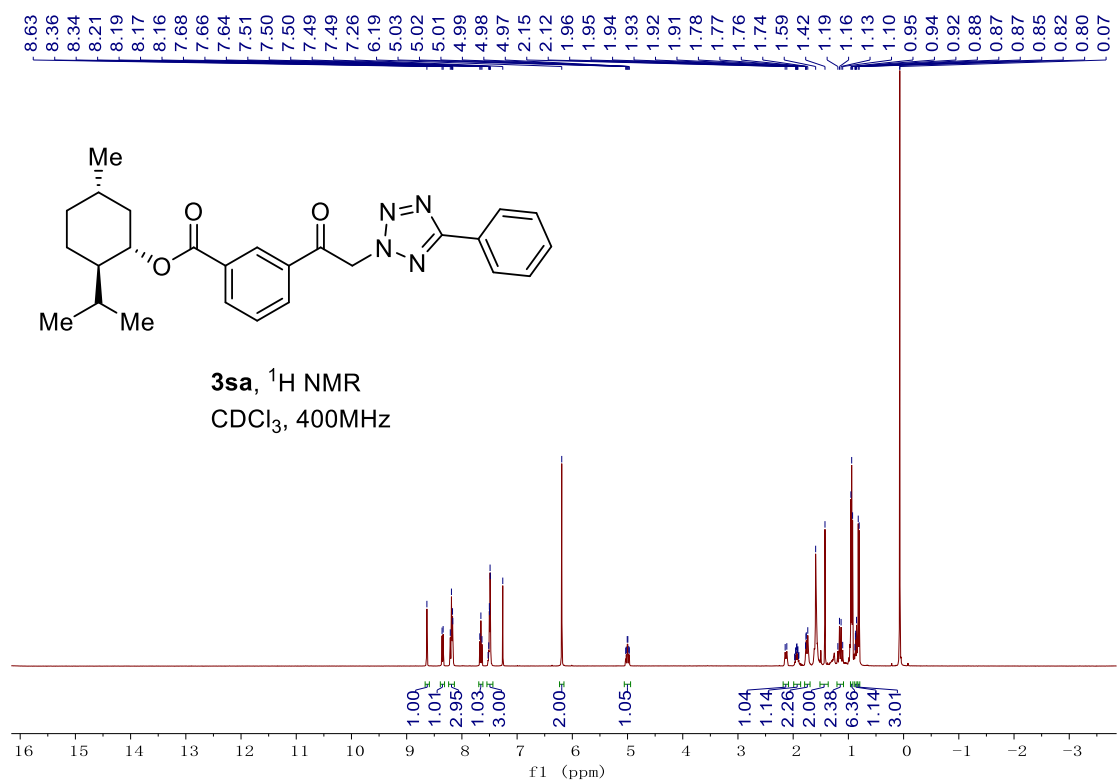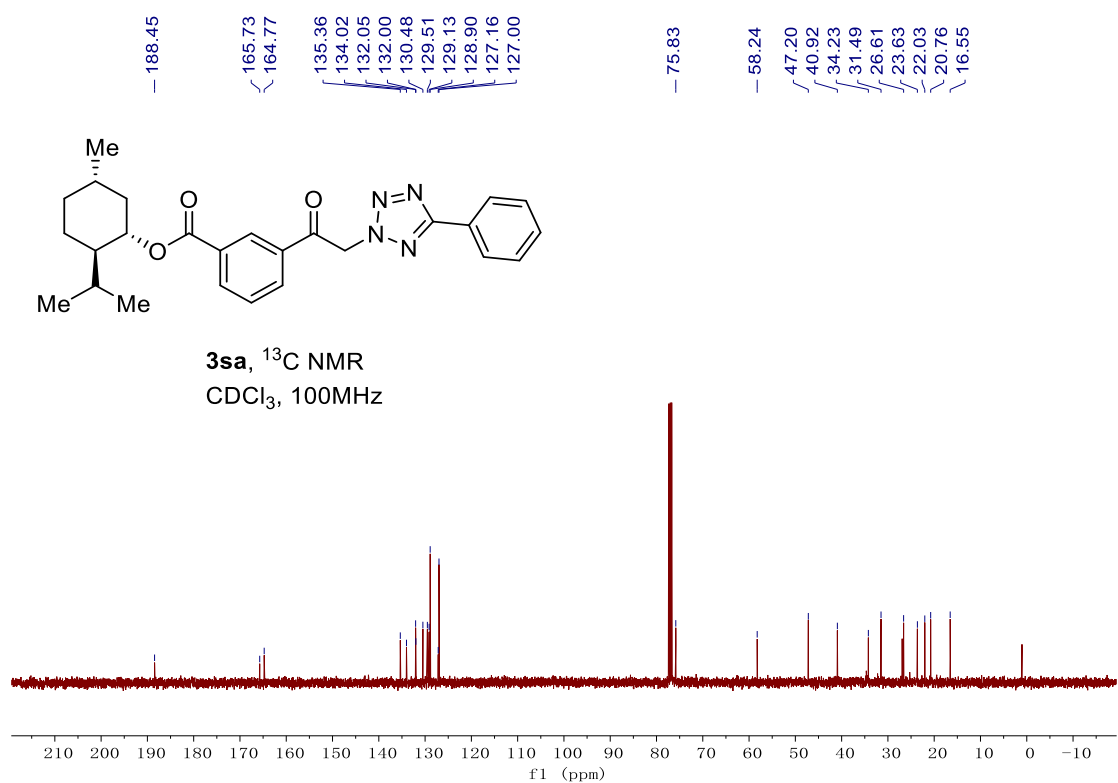

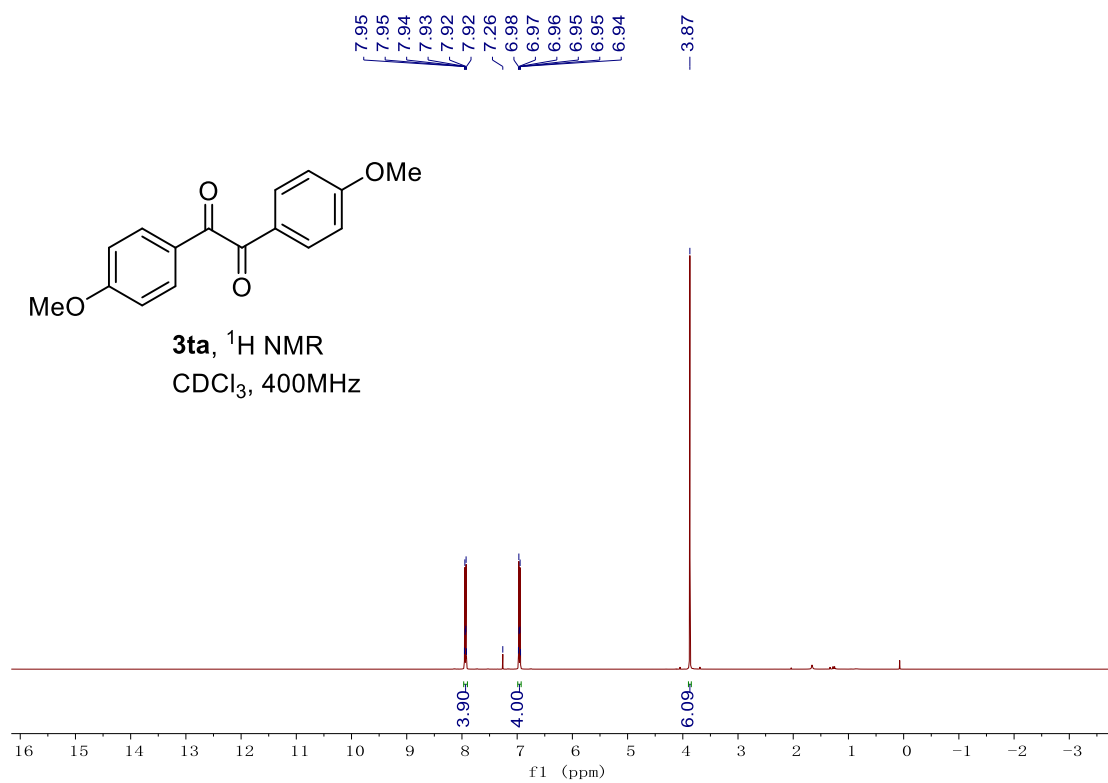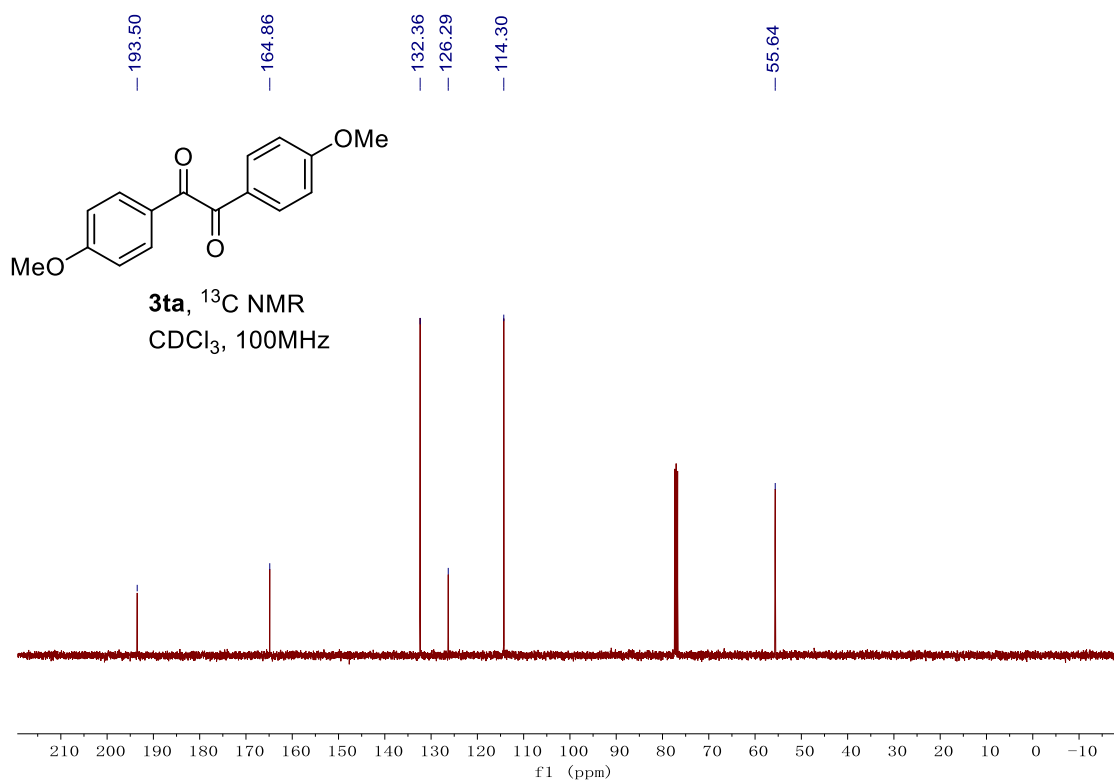

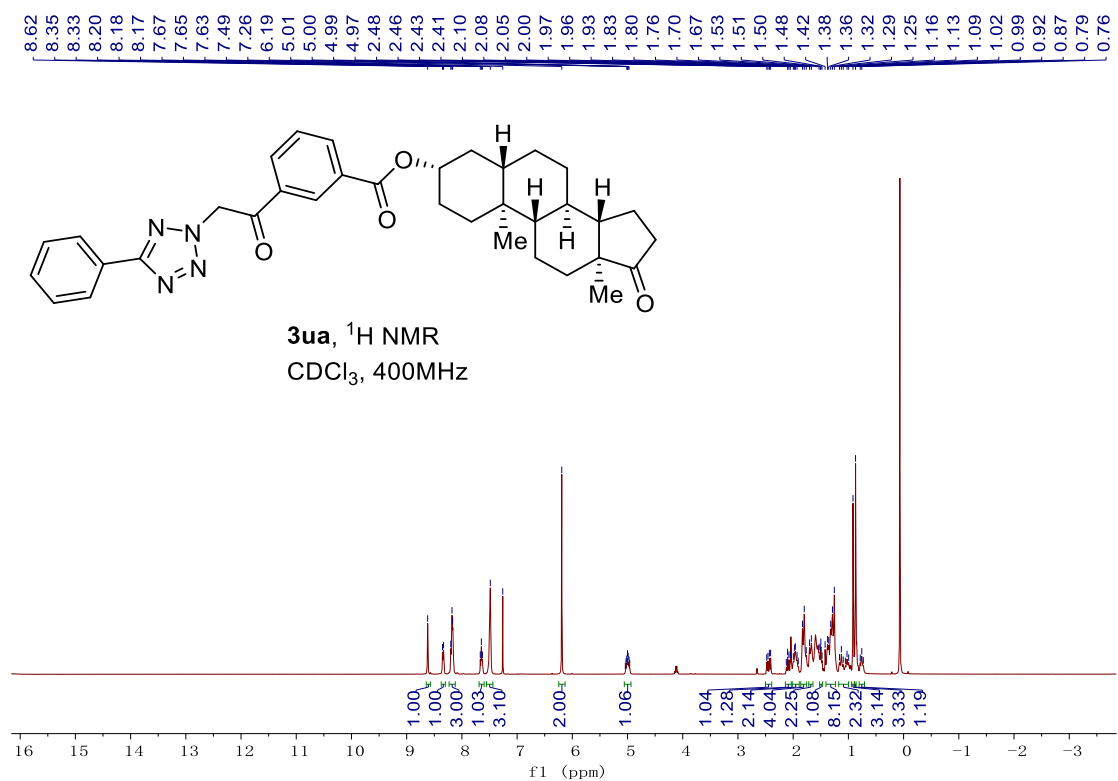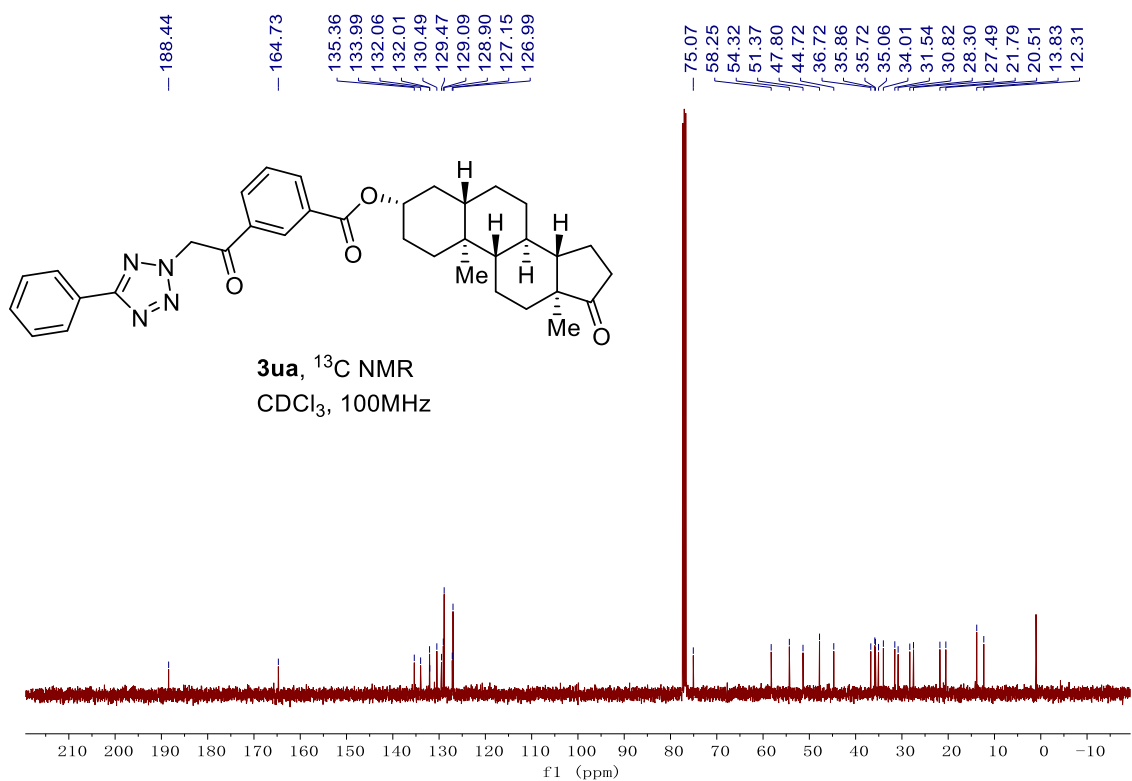



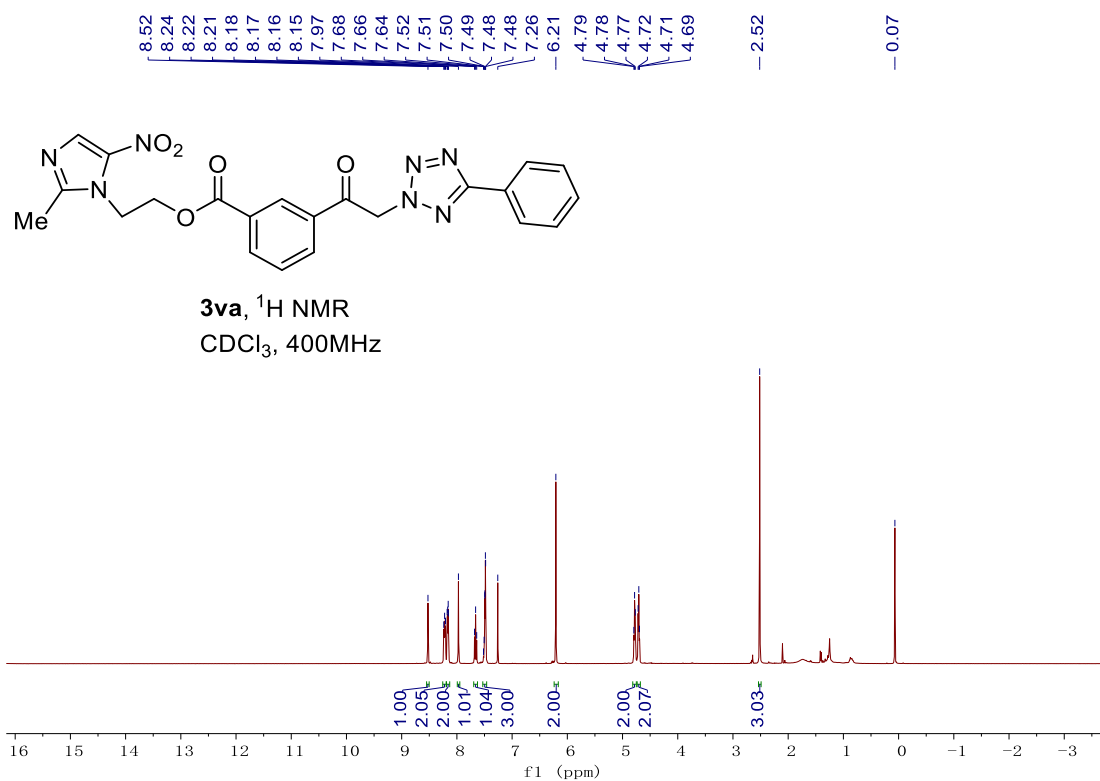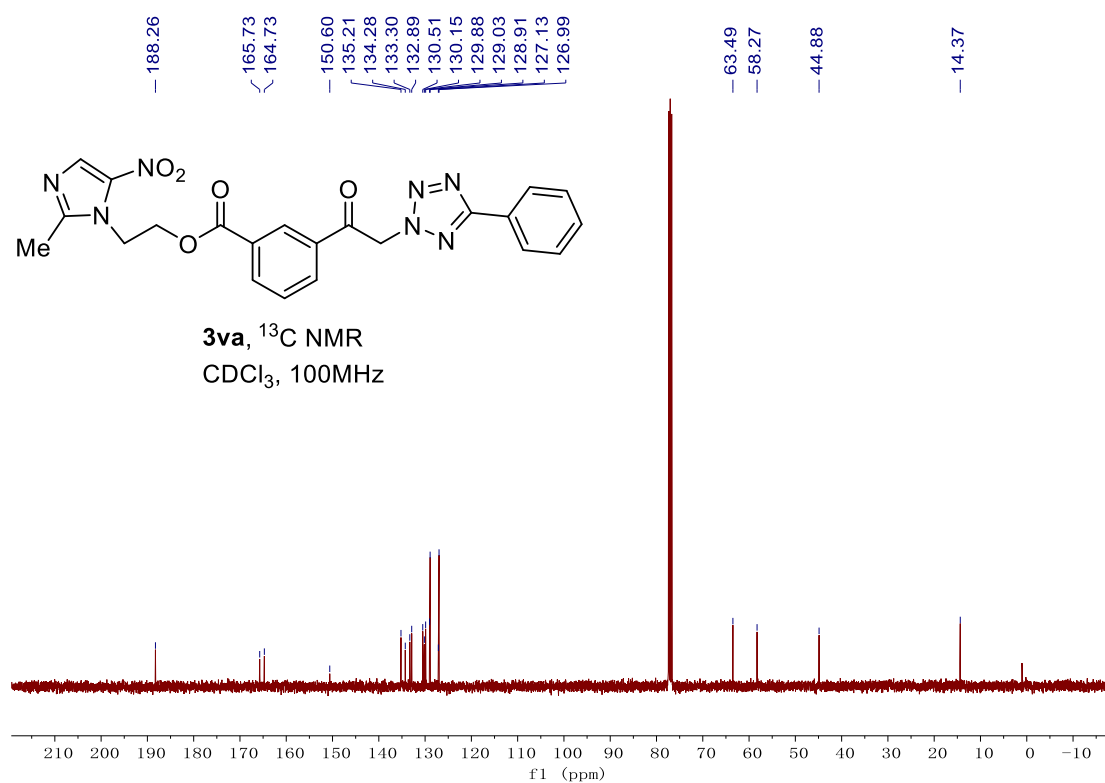

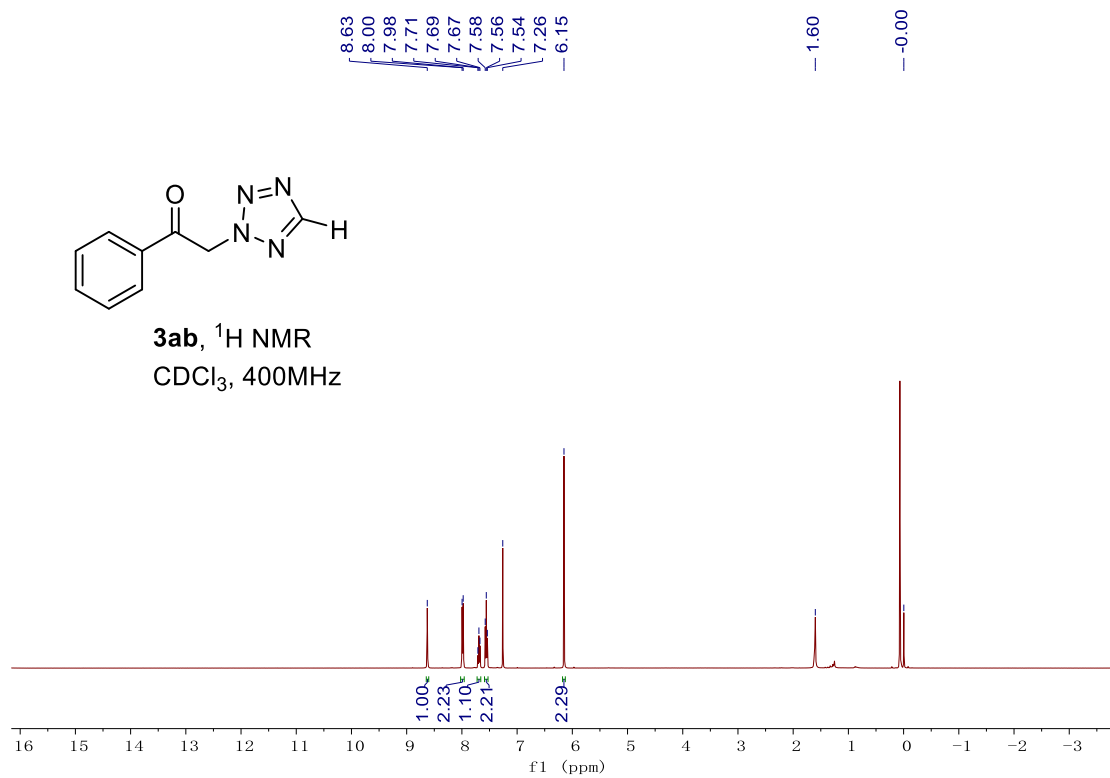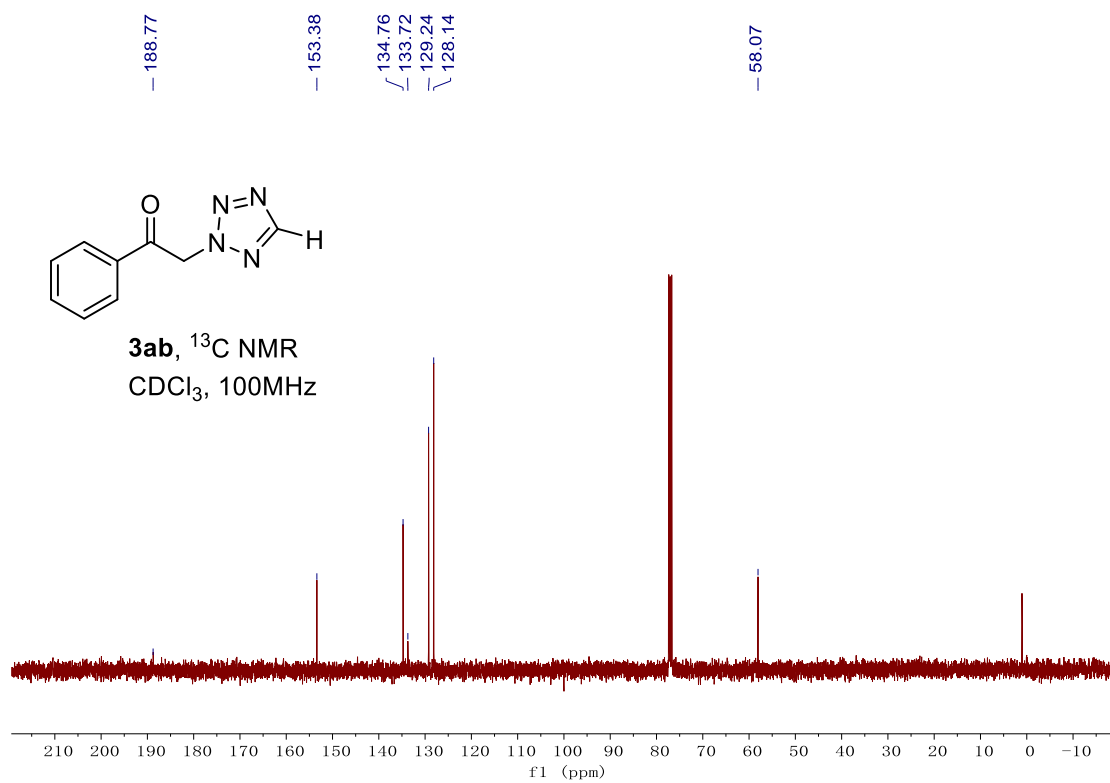

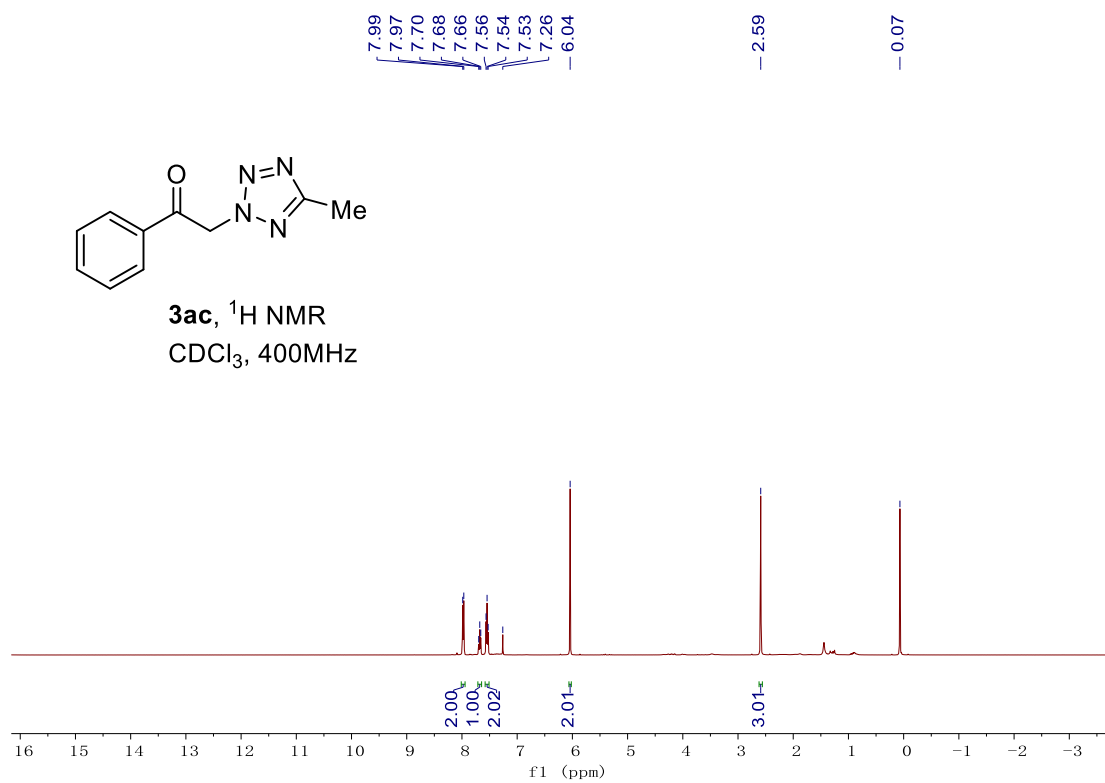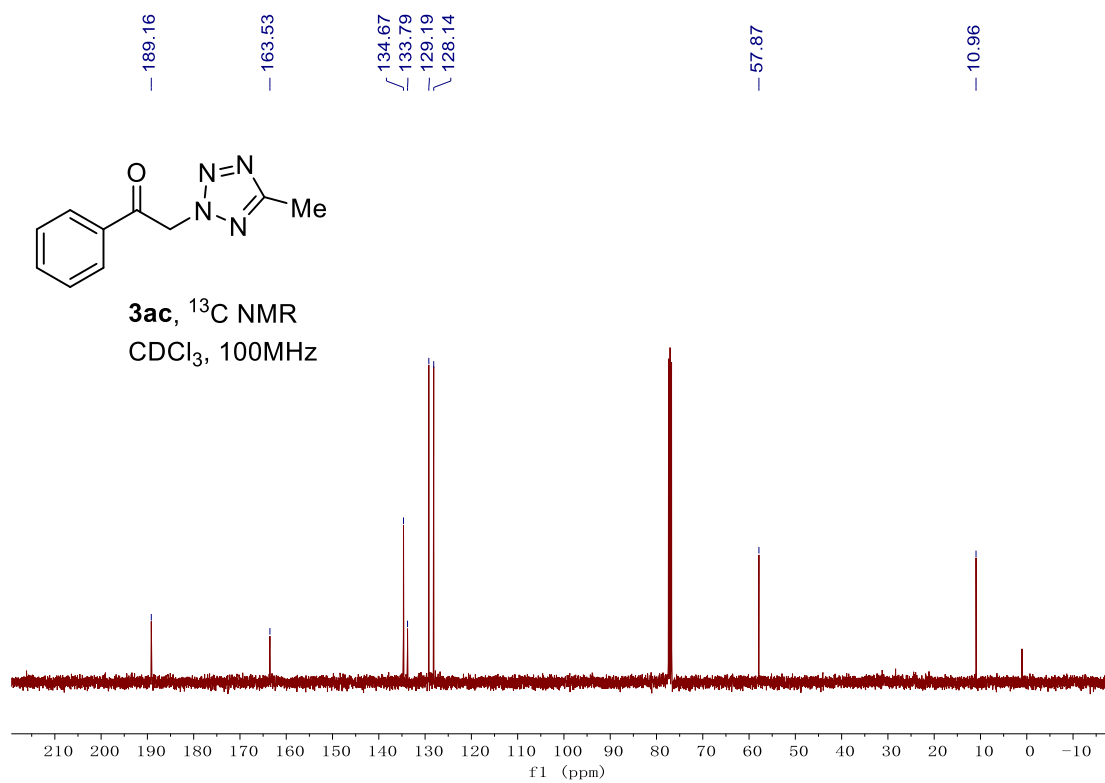

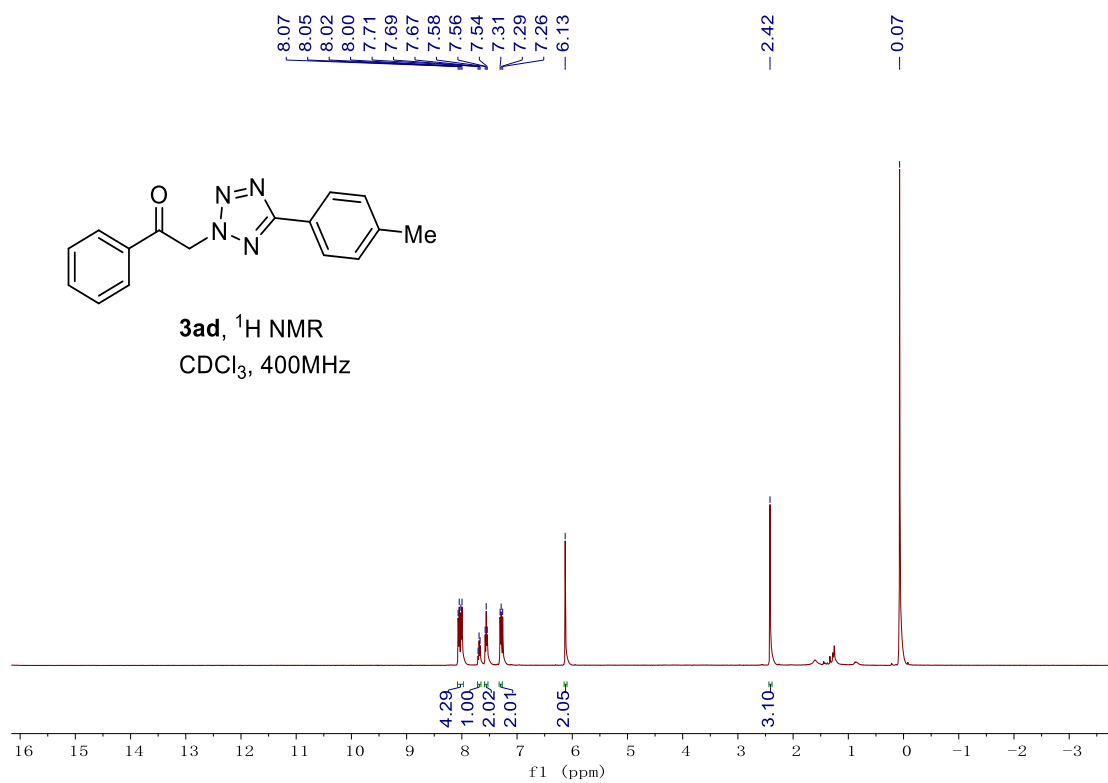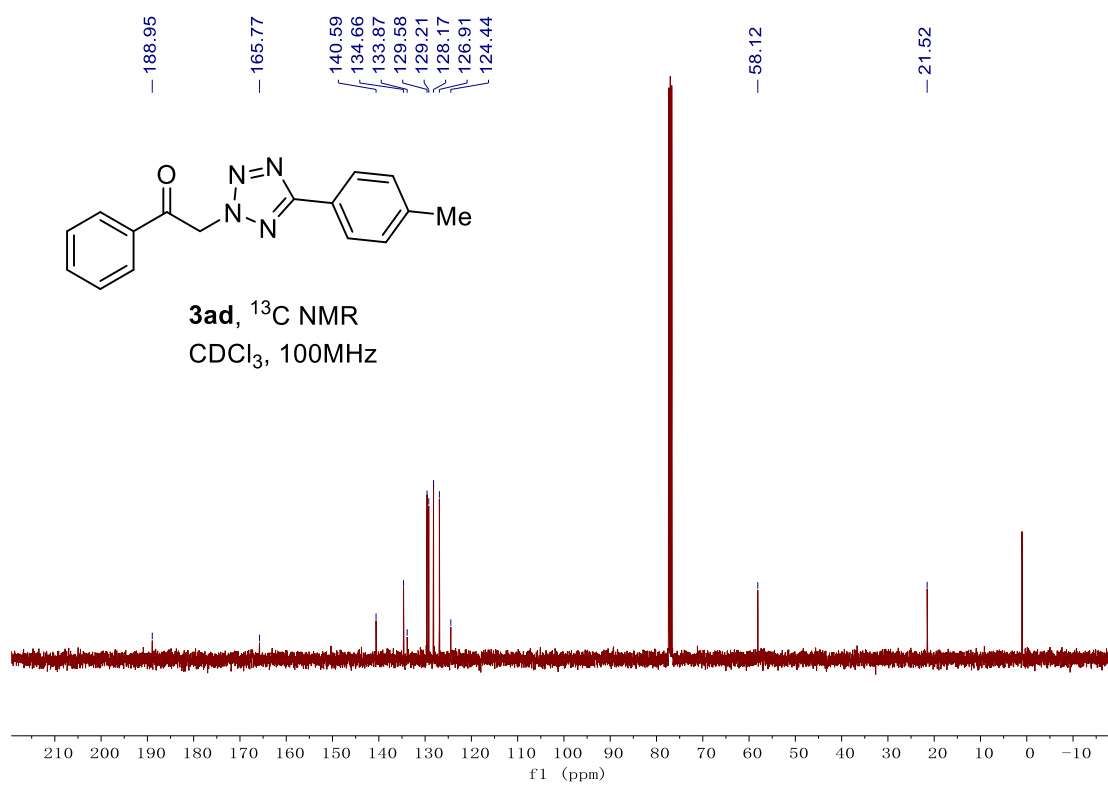

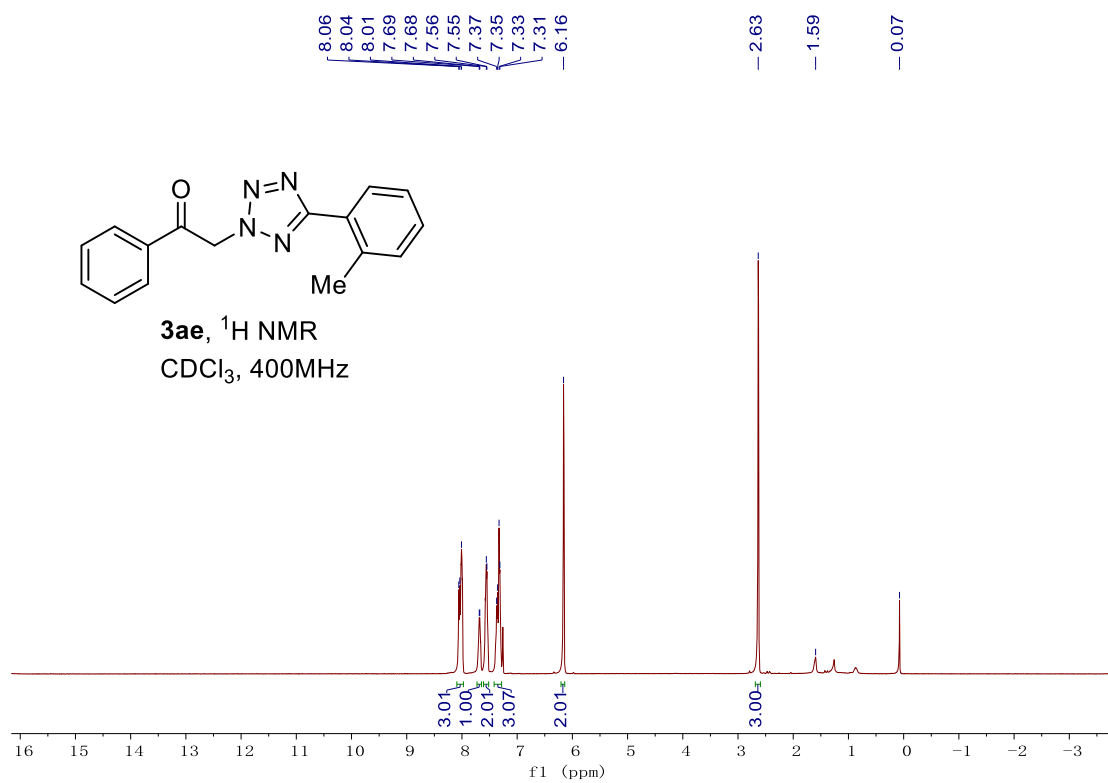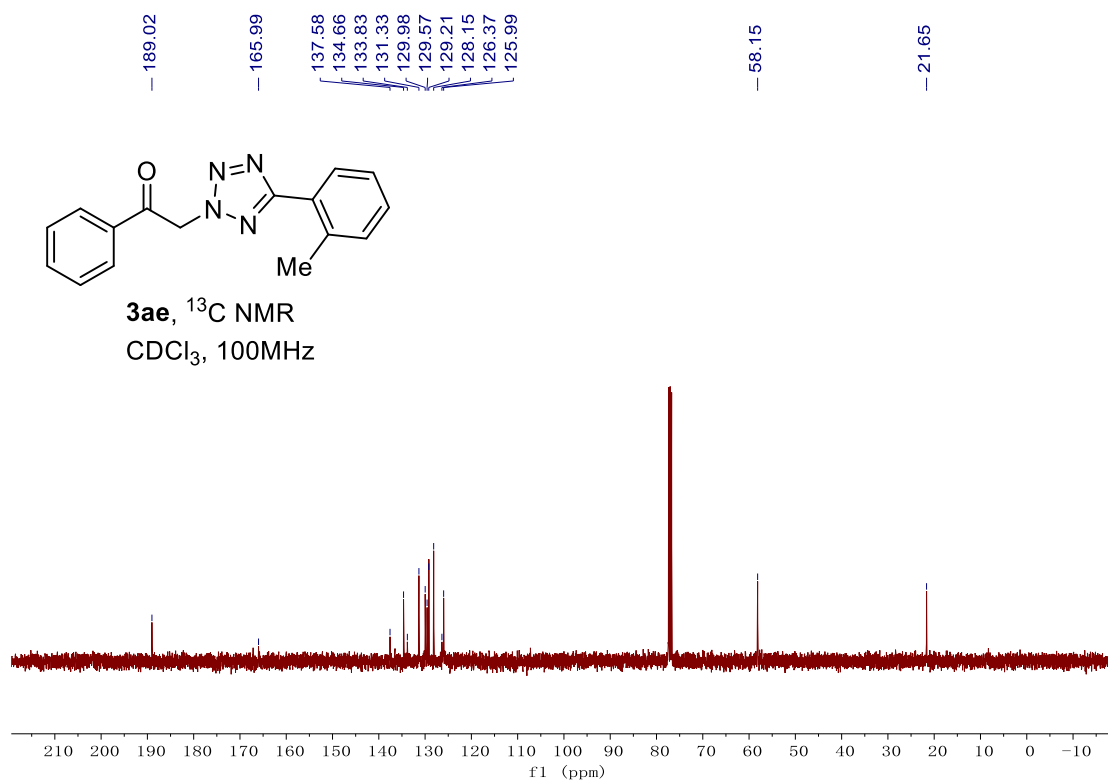

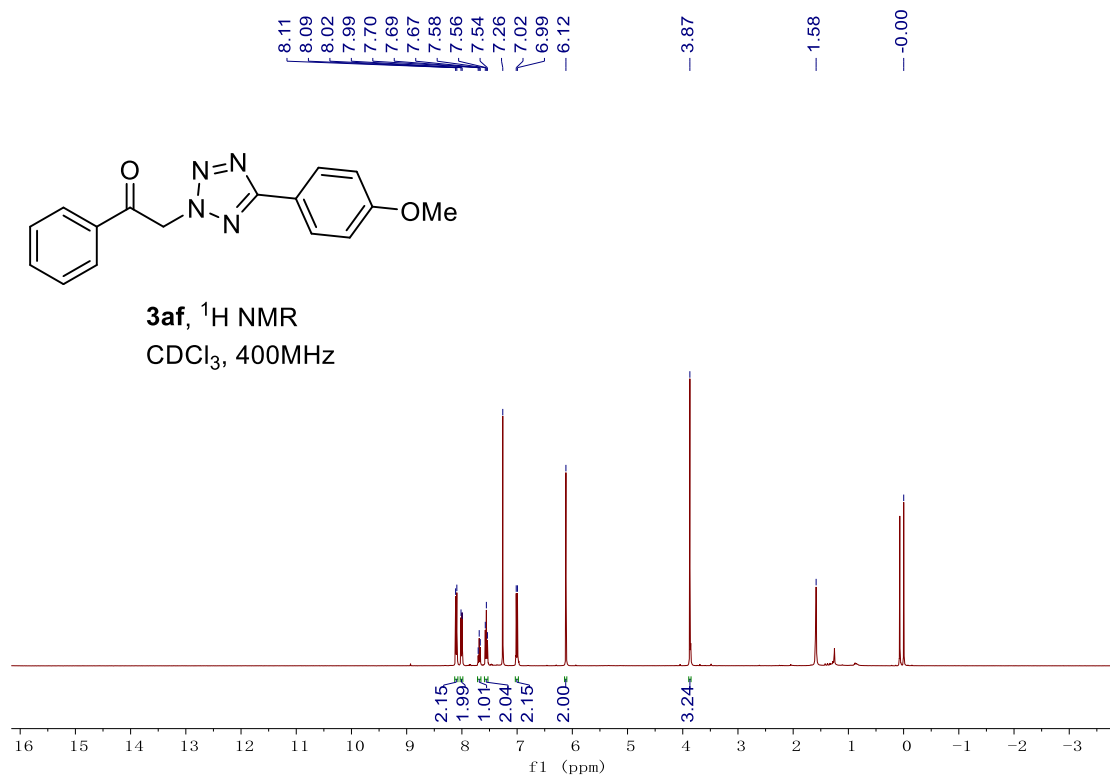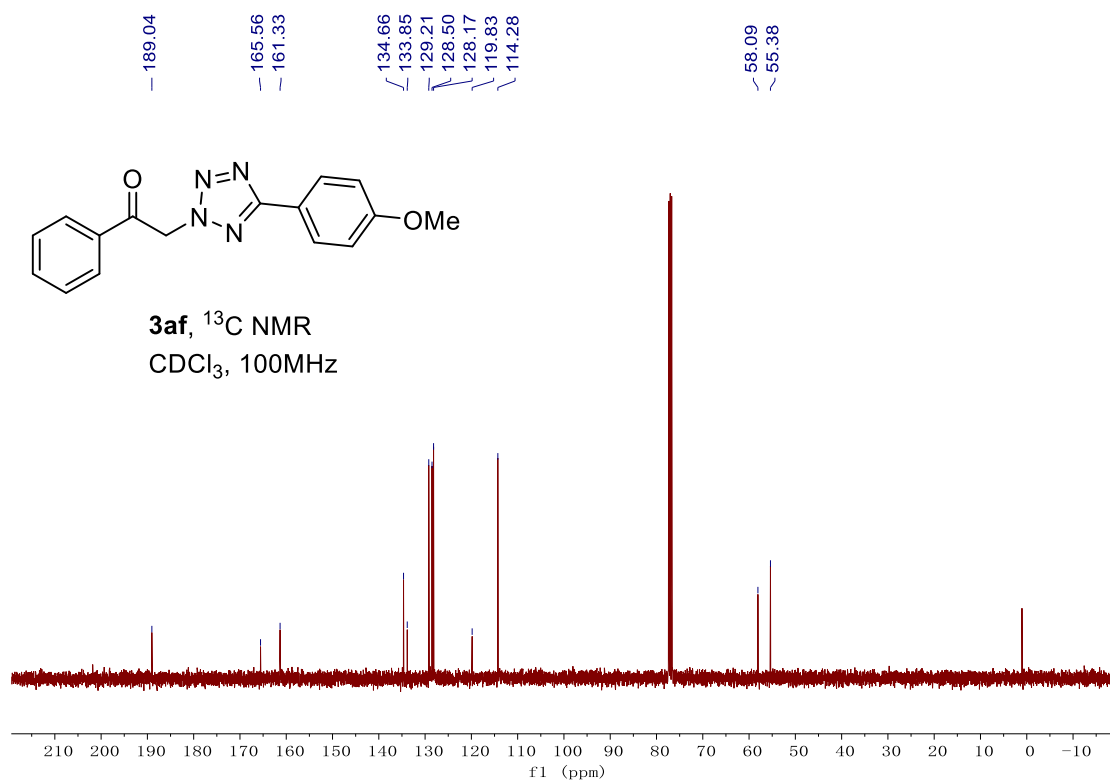

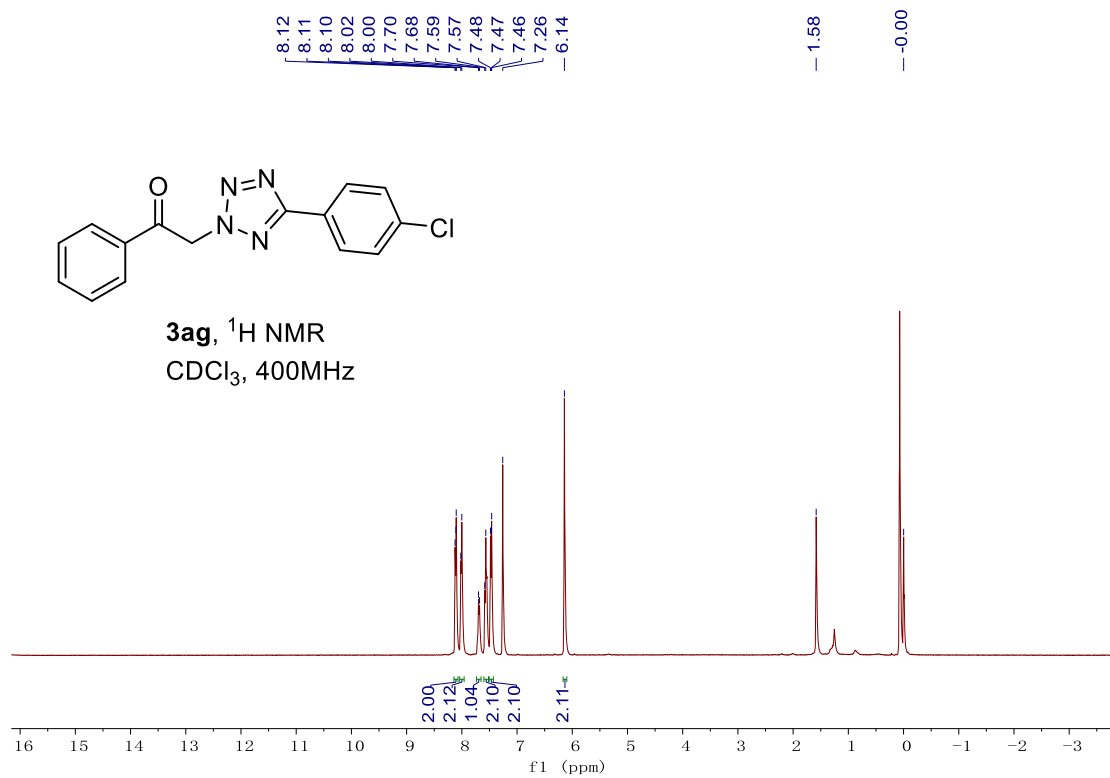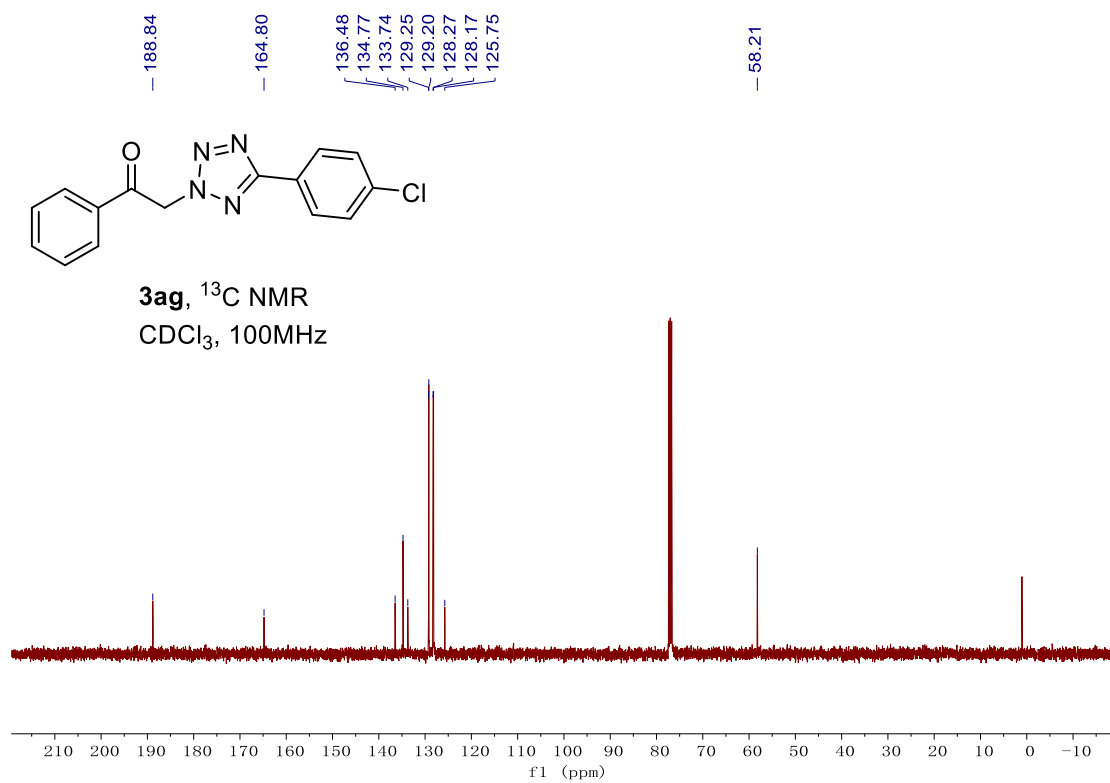

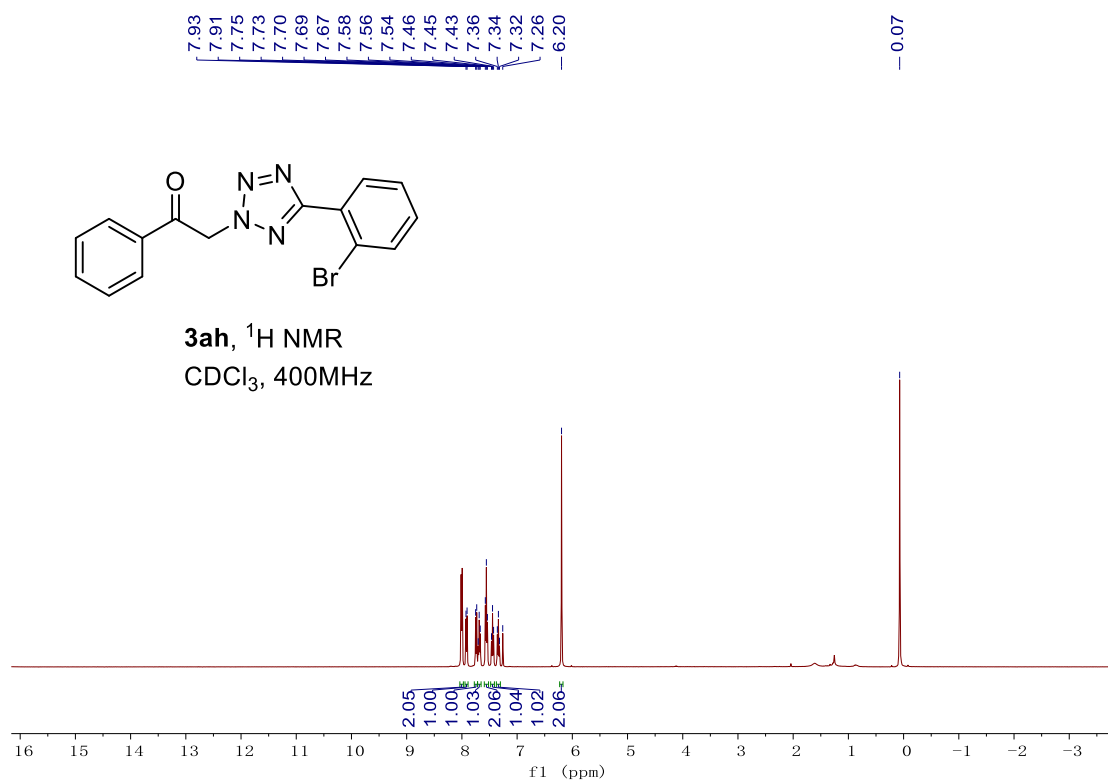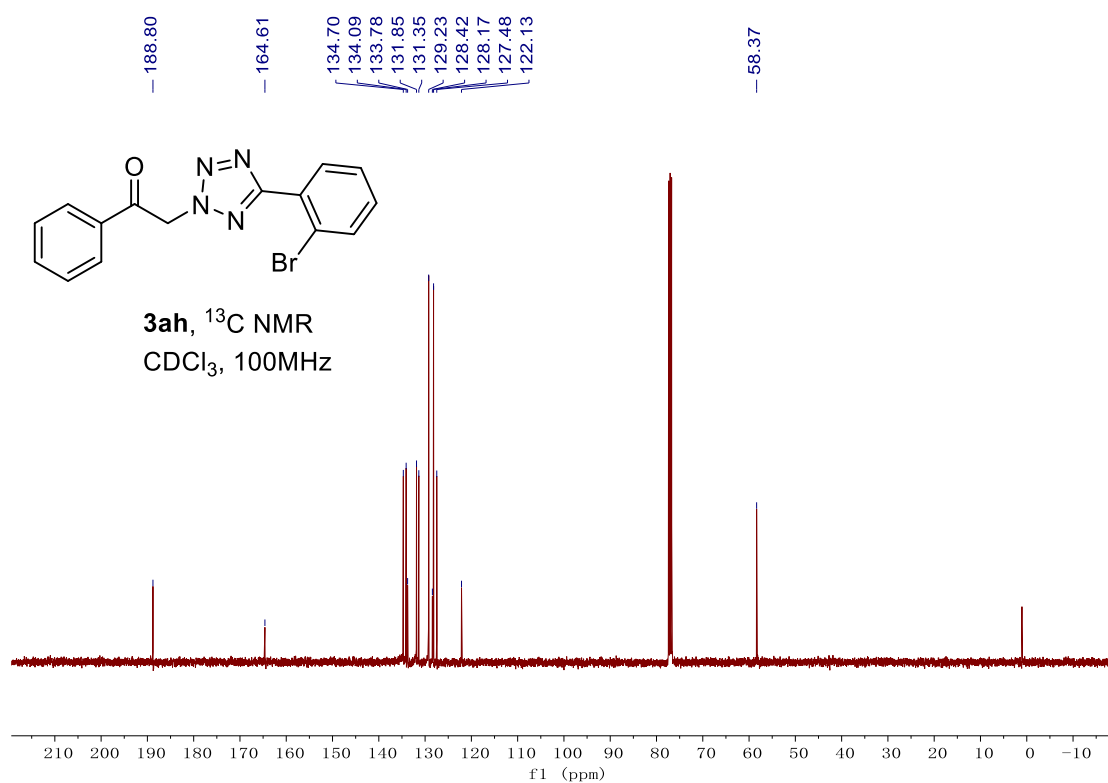



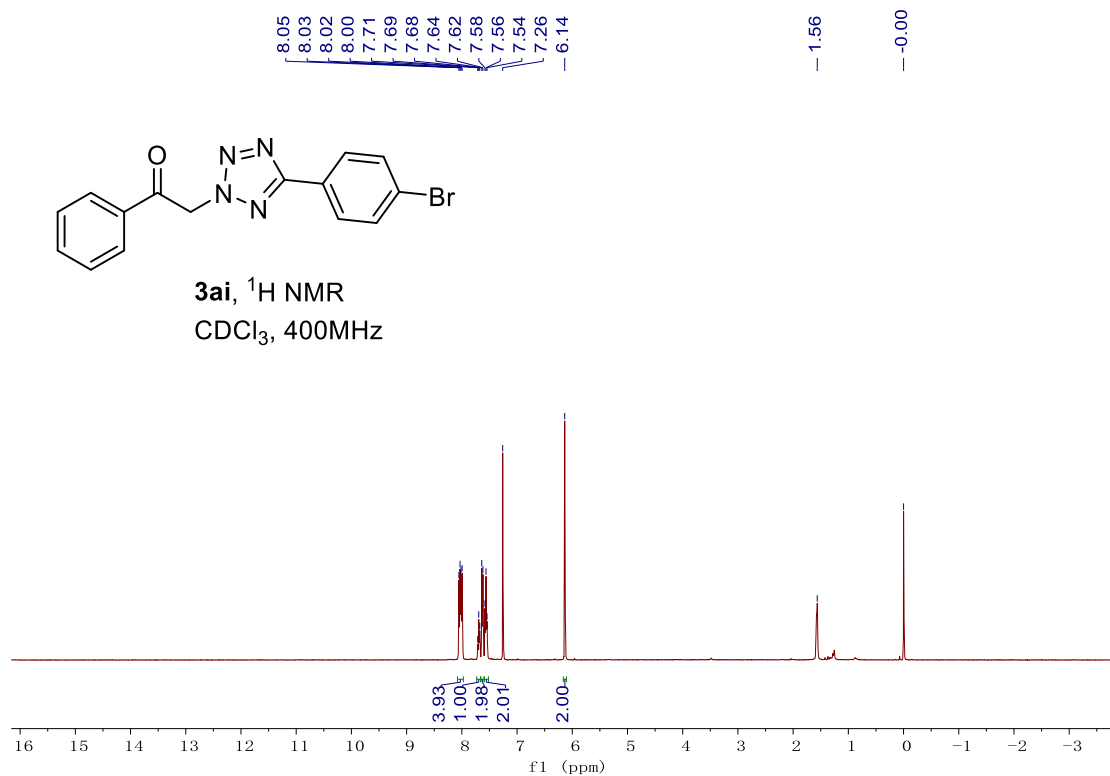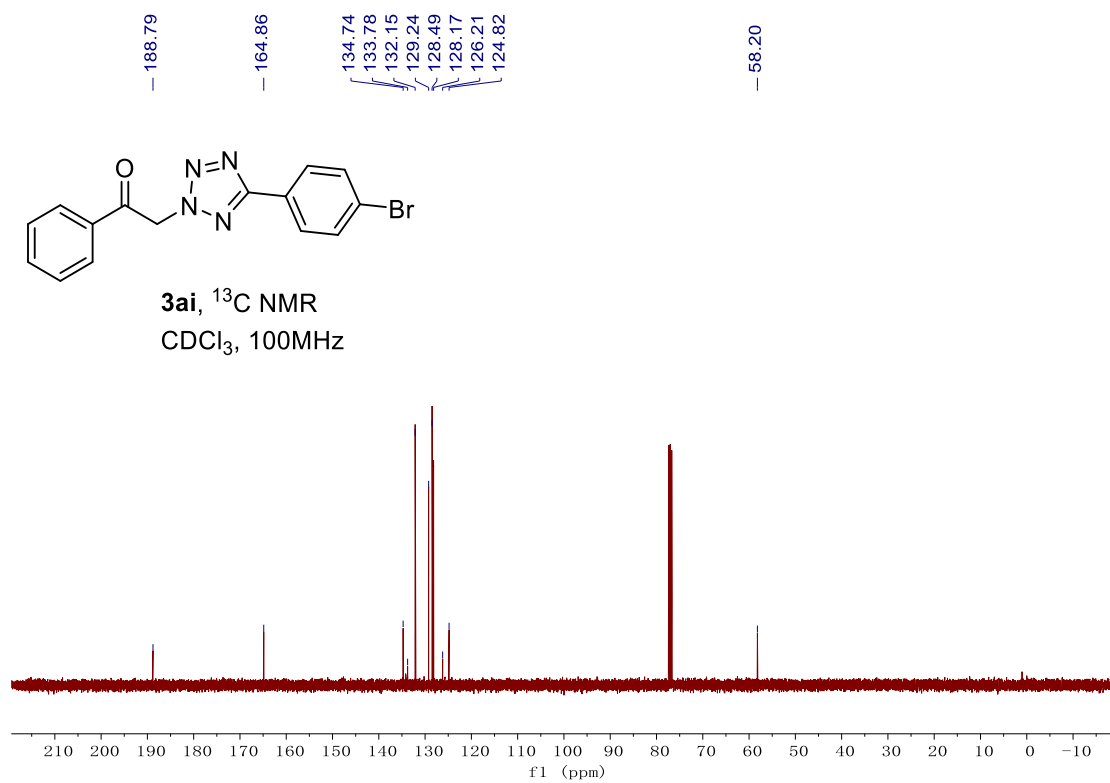

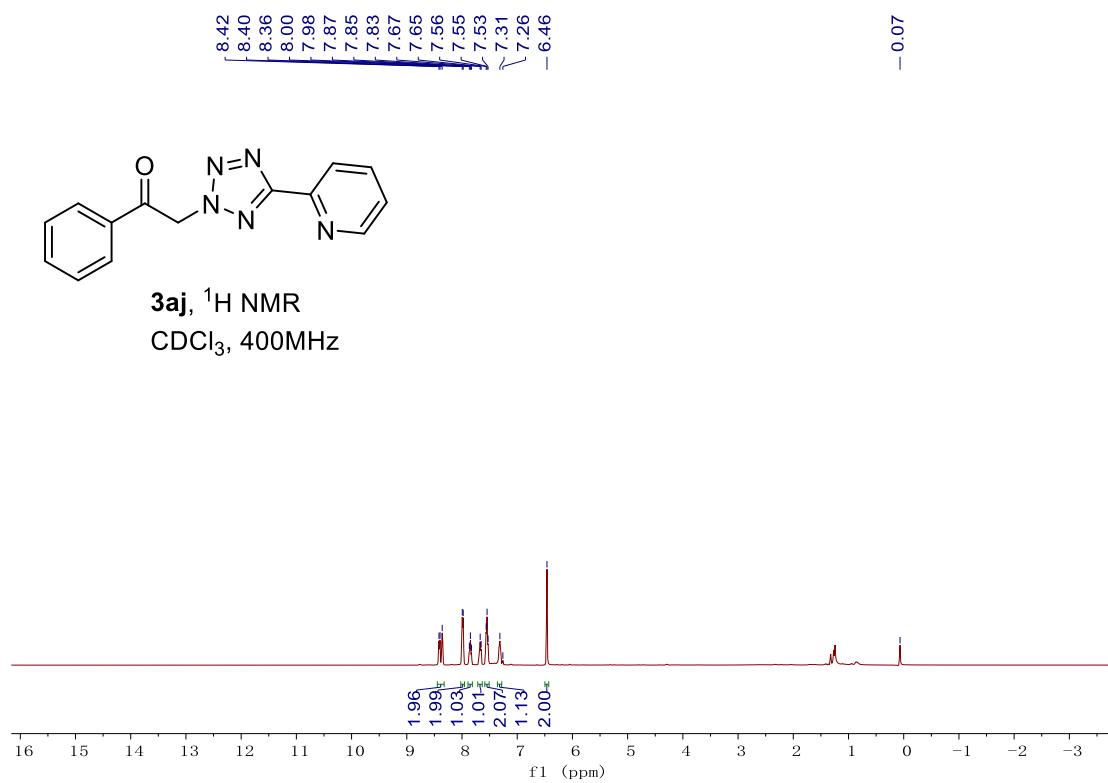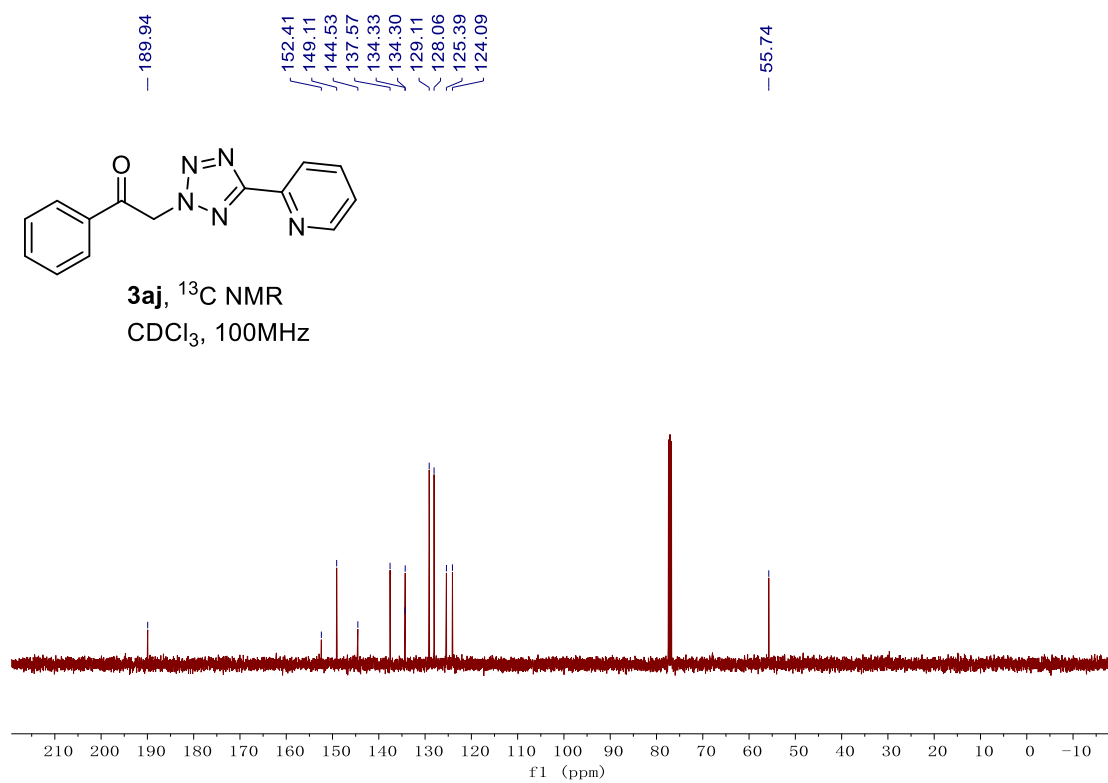

Supplement: d3cc02852f1.pdf [file d3cc02852f1.pdf]
